# Supplementary material for: Genetics of Externalizing Behavior and Structural Brain Development in Adolescence
Source: Preprints.org preprint supplement (doi:10.20944/preprints202202.0077.v1), 2022-02-04
Supplement: Supplementary file 1 [file supplementary]

## Sheet: Associations CBCL
				Assessment #1: 10 years																				Assessment #2: 13 years																				Assessment #3: 18 years
Brain measure				Phenotypic association					Genetic association					Common environment association					Unique environment association					Phenotypic association					Genetic association					Common environment association					Unique environment association					Phenotypic association					Genetic association
atlas	region	abbreviation	correct global brain	estimate	lower CI	upper CI	p-value (0)	p-value (1)	estimate	lower CI	upper CI	p-value (0)	p-value (1)	estimate	lower CI	upper CI	p-value (0)	p-value (1)	estimate	lower CI	upper CI	p-value (0)	p-value (1)	estimate	lower CI	upper CI	p-value (0)	p-value (1)	estimate	lower CI	upper CI	p-value (0)	p-value (1)	estimate	lower CI	upper CI	p-value (0)	p-value (1)	estimate	lower CI	upper CI	p-value (0)	p-value (1)	estimate	lower CI	upper CI	p-value (0)	p-value (1)	estimate
global	Total brain volume	TBV	NO	-0.06	-0.2077	0.0916	0.433072	2.12887e-69	-0.1105	-0.302	0.0361	0.299106	1.91616e-08	0.7372	-1	NA	0.531839	0.861876	-0.137	-0.4969	0.2501	0.497756	1.62489e-34	-0.1056	-0.2481	0.0398	0.151969	2.01552e-74	-0.1226	-0.2791	-0.1226	0.160025	1.53844e-12	0.5603	-1	1	0.780163	0.862492	-0.2177	-0.5255	NA	0.23991	3.42766e-32	-0.0551	-0.2019	0.0922	0.463095	6.07215e-75	-0.0654
global	Global white matter mean fractional anisotropy	GFA	NO	0.1756	0.0231	0.3198	0.0235472	5.19976e-86	0.087	0.0195	0.3714	0.478167	0.000655825	0.7705	NA	NA	0.26607	0.410367	0.2339	-0.1753	0.5651	0.259784	3.20227e-25	0.1977	NA	0.3509	0.0157516	2.17399e-55	0.1025	-0.1615	0.3413	0.426254	0.000149439	0.9847	-1	1	0.117245	0.816227	0.0564	NA	0.3463	0.718782	5.46802e-33	-0.0134	-0.1601	0.1458	0.870308	7.44351e-65	0.0076
global	Global white matter mean diffusivity	GMD	NO	-0.1284	-0.2791	0.0305	0.11126	2.91996e-71	-0.2309	-0.4963	-0.2086	0.0889416	4.32257e-06	0.3178	-1	1	0.646382	0.168307	-0.0257	-0.3451	0.2986	0.881596	1.03653e-43	-0.1994	-0.3489	-0.0403	0.0139719	9.9425e-73	-0.265	-0.4795	-0.17	0.0410445	9.19353e-06	0.2907	-1	1	0.794004	0.46499	-0.1894	-0.4751	0.1299	0.241481	4.19627e-40	0.0423	-0.1131	0.1968	0.591005	5.75441e-59	-0.1221
global	Total cortical gray matter volume	CGM	YES	-0.0229	-0.1675	0.1197	0.695907	4.47722e-71	0.0773	-0.1836	0.3914	0.571159	4.26582e-06	-0.9091	-1	-0.9091	0.124462	0.116121	0.0633	-0.338	0.4386	0.739091	1.21479e-29	-0.1998	-0.3546	-0.0388	0.0119175	5.57104e-79	-0.0116	-0.0446	0.0182	0.85933	2.21266e-07	-0.9687	-1	-0.8163	0.0256498	0.0141036	-0.1232	-0.4119	0.1792	0.42495	5.41255e-43	0.0693	-0.0806	0.2128	0.338611	1.68645e-61	0.183
global	Total subcortical gray matter volume	SGM	YES	-0.0496	-0.1979	0.1012	0.46499	3.94961e-68	-0.1052	-0.4171	0.1737	0.389283	2.32852e-05	0.0076	NA	1	0.715505	0.49013	0.1179	-0.226	0.4241	0.419058	6.44836e-40	-0.0512	-0.2024	0.1036	0.469577	3.43306e-68	-0.0831	-0.353	0.0651	0.492568	3.29408e-05	0.1245	-1	1	0.600963	0.477222	-0.0322	-0.3285	0.2707	0.725808	2.03625e-36	-0.0471	-0.196	0.103	0.502772	2.73214e-70	-0.0695
global	Total cortical white matter volume	WMV	YES	0.0339	-0.1086	0.1779	0.627003	2.68715e-73	-0.054	-0.4002	0.2149	0.672054	4.70252e-07	0.9778	-1	1	0.15419	0.814103	-0.0605	-0.4595	0.3527	0.785915	2.90004e-37	0.154	-0.002	0.3054	0.0531175	2.6723e-56	0.0131	-0.2438	0.2579	0.455434	2.25391e-09	0.9257	-1	1	0.0914896	0.715829	0.0844	-0.2141	NA	0.58622	8.65717e-34	-0.0943	-0.2404	0.0584	0.330934	1.00956e-69	-0.187
subcortical	Left putamen	PUT_L	YES	-0.0272	-0.1855	0.1329	0.628509	1.47116e-69	-0.0429	-0.2947	-0.0429	0.610761	8.16451e-08	-0.0127	NA	1	0.744331	0.420643	0.0476	-0.3325	0.4112	0.680634	3.32827e-30	-0.0443	-0.1987	0.1126	0.515909	4.23712e-68	-0.0358	-0.2685	0.2162	0.693403	3.76715e-07	-0.0767	-1	1	0.731944	0.415405	-0.088	-0.3846	0.2166	0.508588	1.13773e-41	-0.133	-0.2741	0.0154	0.0737199	1.31357e-80	-0.2623
subcortical	Left hippocampus	HIP_L	YES	-0.0094	-0.1487	0.1293	0.854344	1.33095e-73	0.0482	-0.3692	0.445	0.709779	7.63089e-06	-0.8945	-1	1	0.250295	0.202395	0.2096	-0.1726	0.5181	0.264781	4.2068e-34	-0.1716	-0.3129	-0.0221	0.0235529	1.17761e-76	-0.1772	-0.5343	-0.1772	0.14854	8.89719e-06	-0.7611	-1	1	0.460961	0.260892	0.104	-0.1893	0.3887	0.485297	1.19973e-34	0.015	-0.1301	0.1582	0.748095	1.47022e-67	0.0699
subcortical	Left amygdala	AMY_L	YES	-0.0851	-0.2279	0.0621	0.253147	7.17749e-73	0.0232	0.0232	0.7592	0.910512	0.0326377	-0.597	NA	1	0.487834	0.305842	-0.1421	-0.4397	0.1926	0.401184	3.52123e-53	-0.0274	-0.1802	0.1263	0.726558	1.59585e-65	0.0482	-1	1	0.803725	0.0656832	-0.2176	NA	1	0.80081	0.282763	-0.1946	-0.4632	0.1101	0.205686	8.90362e-58	-0.0687	-0.2077	0.0741	0.340744	2.38528e-70	-0.0527
subcortical	Right putamen	PUT_R	YES	-0.0744	-0.2225	0.0789	0.314075	1.99925e-69	-0.0376	-0.3017	0.2123	0.671762	5.81036e-08	-0.556	-1	1	0.580367	0.237638	-0.0175	-0.3507	0.3256	0.79077	5.98157e-43	-0.0203	-0.1727	0.1341	0.708465	6.88529e-68	0.061	-0.1661	0.2913	0.536467	1.88676e-08	-0.5482	-1	1	0.449459	0.307354	-0.1258	-0.4147	0.1888	0.403563	1.94285e-33	-0.1135	-0.2543	0.032	0.107697	1.4366e-75	-0.1559
subcortical	Right hippocampus	HIP_R	YES	-0.1164	-0.2548	0.0224	0.0982531	7.78106e-77	-0.3267	-0.7518	-0.0184	0.0362296	9.08993e-06	-0.2666	-1	1	0.777608	0.323699	0.4464	0.0631	0.6887	0.0235544	1.11287e-23	-0.1436	-0.2882	0.0078	0.0610364	1.87998e-85	-0.2248	-0.4993	-0.2248	0.0622603	6.24681e-06	0.0795	-1	1	0.926134	0.156922	0.1546	-0.1903	0.4585	0.372828	2.33064e-29	-0.0193	-0.1661	0.1258	0.785574	6.46857e-72	0.0895
subcortical	Right amygdala	AMY_R	YES	-0.1469	-0.2829	-0.0057	0.0402938	1.69011e-79	-0.1967	-0.577	-0.1967	0.202451	0.000651703	-0.8814	NA	1	0.674179	0.608929	0.04	-0.2915	0.3614	0.818115	1.03775e-50	-0.0592	-0.207	0.0902	0.435186	1.14275e-71	-0.0828	-0.3978	0.2378	0.590073	0.000685542	0.3159	-1	1	0.899793	0.840968	-0.1041	-0.4097	0.2266	0.560154	3.24333e-38	-0.0679	-0.2084	NA	0.351382	3.80981e-69	-0.0761
temporal cortex	Left banks of superior temporal gyrus	Bank_L	YES	-0.0729	-0.2165	0.0738	0.405824	1.6247e-75	-0.0759	-0.5409	0.3173	0.685554	0.000304253	1	-1	NA	0.850955	1	-0.1643	-0.4551	0.1798	0.339966	8.18274e-49	-0.135	-0.2748	0.011	0.0675953	2.33803e-81	-0.2429	-0.9048	-0.2429	0.140404	0.00162733	-1	NA	1	0.52079	0.558377	0.1351	-0.2013	0.4292	0.425147	4.95033e-41	-0.1324	-0.2702	0.0118	0.120988	1.05253e-77	-0.2111
anterior cingulum	Left caudal anterior cingulate cortex	ACc_L	YES	-0.1151	-0.2492	0.0246	0.103864	7.74954e-83	-0.1513	-1	-0.1513	0.530789	0.0578576	1	-1	NA	0.624625	1	-0.2789	-0.5681	0.0774	0.121827	2.19574e-64	-0.0452	-0.1868	0.0987	0.535176	6.32371e-75	-0.121	-0.854	-0.121	0.480184	0.0249162	1	-1	NA	0.610702	1	-0.045	NA	0.3031	0.807461	1.8771e-44	0.0005	-0.1402	0.1424	0.994492	4.45344e-72	-0.0083
frontal cortex	Left caudal middle frontal gyrus	cMFG_L	YES	-0.0513	-0.1989	0.0987	0.430139	3.60666e-72	-0.2205	-1	1	0.504522	0.173754	0.0268	-1	1	0.777888	0.161773	0.117	-0.3371	0.4926	0.537753	1.27225e-40	-0.1475	-0.2916	0.0029	0.0465826	2.20095e-75	-0.3635	-1	1	0.27544	0.124961	-0.1583	-1	1	0.778528	0.14484	-0.0786	-0.3614	0.2144	0.535324	1.85945e-56	-0.0482	-0.1905	0.0954	0.434797	1.76719e-80	-0.1833
temporal cortex	Left entorhinal gyrus	Ent_L	YES	0.0188	-0.1246	0.1616	0.796976	2.08311e-70	0.2414	-0.031	0.8892	0.34633	0.00866571	-0.0939	NA	1	0.874065	0.346813	-0.2732	-0.5148	0.0248	0.07005	4.05759e-62	-0.1095	-0.2565	0.0446	0.197983	2.44842e-71	-0.2649	-0.9975	-0.2649	0.25677	0.0179227	0.2935	-1	1	0.700673	0.349754	-0.1354	-0.4312	0.1931	0.418455	6.77312e-56	-0.0392	-0.1828	0.106	0.596815	2.33596e-67	0.0435
temporal cortex	Left fusiform gyrus	FG_L	YES	-0.1449	-0.274	-0.0118	0.0319904	1.05009e-82	-0.348	-0.8949	-0.348	0.121429	0.0261546	-0.872	NA	0.724	0.567641	0.252434	0.1986	NA	0.5261	0.330636	7.12097e-32	-0.2163	-0.3537	-0.0673	0.00492296	8.04393e-88	-0.2732	-0.9916	-0.2206	0.20989	0.0320681	-0.8373	-1	1	0.484855	0.424311	-0.2024	-0.5542	0.2268	0.354405	9.05081e-39	-0.0161	-0.155	0.126	0.821923	5.19407e-71	0.01
temporal cortex	Left inferior temporal gyrus	ITG_L	YES	-0.0484	-0.1899	0.0949	0.507025	4.5025e-72	0.0973	-1	1	0.659773	0.0641789	-0.7355	NA	-0.7355	0.306524	0.169188	-0.0271	-0.3513	0.3015	0.875671	2.24325e-48	-0.1247	-0.2694	0.0248	0.099931	1.60127e-78	0.0347	-0.8131	0.8391	0.848688	0.0463826	-0.8112	-1	NA	0.165366	0.0332801	-0.1896	-0.467	0.1336	0.242218	7.35301e-47	-0.101	-0.2432	0.0455	0.173094	1.46354e-74	-0.1181
frontal cortex	Left lateral orbitofrontal gyrus	lOFG_L	YES	-0.0362	-0.1773	0.1073	0.57787	3.89955e-71	0.0412	-0.476	0.6379	0.878378	0.00165224	0.1095	-1	1	0.620654	0.197298	-0.2704	-0.5416	0.0744	0.112914	2.2962e-56	-0.2162	-0.3554	-0.0668	0.00422626	4.14952e-80	-0.2777	-0.5694	-0.2777	0.0518802	8.34925e-05	-0.205	-1	1	0.528409	0.241272	-0.1623	-0.4332	0.1407	0.248856	3.86966e-53	-0.0187	-0.1639	0.1279	0.635655	1.67059e-67	0.0289
frontal cortex	Left medial orbitofrontal gyrus	mOFG_L	YES	0.0551	-0.0862	0.1949	0.434439	6.91587e-75	-0.0562	-0.5994	0.4669	0.660306	0.000407998	0.5566	-1	1	0.505583	0.481508	0.1032	-0.2703	0.4487	0.604431	5.24536e-37	-0.0536	-0.2073	0.1073	0.492734	3.10652e-72	-0.1662	-0.5845	-0.1662	0.295676	0.00209075	0.5659	-1	1	0.799408	0.79239	0.2031	-0.1457	0.5008	0.255413	3.94972e-32	0.0202	-0.1223	0.1628	0.816654	3.43425e-71	0.0009
temporal cortex	Left middle temporal gyrus	MTG_L	YES	-0.1115	-0.2506	0.029	0.119668	1.1684e-77	-0.0275	-0.3975	0.423	0.870263	0.00353051	-1	NA	1	0.252472	0.104918	-0.048	-0.3816	0.3028	0.794954	1.46745e-38	-0.1762	-0.3211	-0.0256	0.0216073	1.70107e-85	-0.1191	NA	-0.1191	0.528546	0.0135828	-1	NA	1	0.142189	0.130443	0.0553	-0.2585	0.3494	0.730397	1.13755e-46	-0.0923	-0.2331	0.0518	0.20828	4.51417e-75	-0.1843
temporal cortex	Left parahippocampal gyrus	Par_L	YES	-0.0391	-0.177	0.0993	0.771192	7.09949e-73	-0.0076	-0.3491	0.3991	0.974292	0.000512019	-0.2562	-1	1	0.78188	0.431502	-0.0484	-0.3503	0.2615	0.764399	5.62047e-58	-0.0541	-0.2122	0.1075	0.508147	9.15431e-73	-0.1313	-0.4339	NA	0.348385	0.000835534	0.2054	NA	NA	0.827576	0.443373	0.2111	-0.1368	NA	0.228416	1.70869e-23	-0.0053	-0.1503	0.141	0.945066	1.43882e-70	0.0059
frontal cortex	Left pars opercularis	Opr_L	YES	0.0779	-0.0619	0.214	0.273101	5.4925e-85	0.3315	NA	1	0.124996	0.112895	-0.9016	-1	1	0.482074	0.477992	-0.1747	-0.4829	0.1782	0.43082	2.29088e-47	0.0302	-0.1125	0.1722	0.648009	1.18867e-69	0.1895	0.1228	0.9518	0.292443	0.0424605	-0.6781	-1	1	0.735649	0.62739	-0.2933	-0.5958	0.1034	0.165486	1.99364e-49	0.0791	-0.0627	0.2189	0.270696	2.18857e-67	0.1893
frontal cortex	Left pars orbitalis	Orb_L	YES	-0.0034	-0.143	0.1371	0.966914	7.66973e-80	0.0282	-0.3769	0.399	0.876274	0.00838904	0.5477	-1	1	0.836355	0.958807	-0.1398	-0.4017	0.1517	0.34198	4.67372e-59	-0.0882	-0.2305	0.0582	0.235656	8.17907e-80	-0.1763	-0.9699	-0.1763	0.44776	0.0155062	0.6435	-1	1	0.795412	0.957424	-0.0294	-0.3293	0.276	0.854044	6.80653e-46	-0.0163	-0.1545	0.1239	0.819678	2.55376e-70	-0.1302
frontal cortex	Left pars triangularis	Tri_L	YES	0.0448	-0.0886	0.1761	0.616336	5.60947e-78	0.1965	-0.0074	0.9996	0.242526	0.0726974	-0.7536	-1	1	0.532099	0.328706	-0.0062	-0.3015	0.2995	0.838248	1.63861e-48	-0.0886	-0.2293	0.0563	0.52718	1.86154e-76	-0.0823	-0.9992	0.3233	0.777652	0.0306436	-0.9952	NA	1	0.561294	0.551916	-0.0206	-0.3553	0.3198	0.908478	1.13821e-42	-0.0068	-0.1463	0.133	0.771121	4.99259e-76	0.0871
anterior cingulum	Left rostral anterior cingulate gyrus	ACr_L	YES	-0.0854	-0.2263	0.059	0.242396	1.16988e-78	0.0434	-1	1	0.697838	0.245513	-0.2886	-1	1	0.519648	0.212961	-0.174	-0.4792	0.1961	0.362684	5.11919e-47	-0.1473	-0.2892	0.0015	0.0460927	2.29862e-78	-0.1639	-1	1	0.449106	0.108303	-0.3848	-1	1	0.385585	0.23144	-0.1012	-0.3874	0.202	0.514384	3.26975e-54	-0.1076	-0.2481	0.0375	0.174074	3.85454e-74	-0.0192
frontal cortex	Left rostral middle frontal gyrus	rMFG_L	YES	-0.0843	-0.2229	0.0551	0.234286	2.2881e-75	0.1267	NA	0.7494	0.519663	0.00355251	-1	NA	1	0.148501	0.121934	-0.1995	-0.4988	0.1414	0.252021	1.21651e-56	-0.2364	-0.3729	-0.0921	0.00141731	1.61323e-84	-0.2231	-0.43	-0.2231	0.081656	3.85238e-05	-1	NA	1	0.142548	0.142395	-0.0127	-0.3312	0.3087	0.939903	9.75921e-41	-0.1145	-0.2581	0.0321	0.12392	1.94506e-74	-0.0705
frontal cortex	Left superior frontal gyrus	SFG_L	YES	0.078	-0.0615	0.2127	0.267605	3.20207e-73	0.45	0.45	1	0.0730418	0.147701	-0.9814	NA	NA	0.0584783	0.0256963	0.0745	-0.2983	0.4351	0.709799	1.82077e-32	-0.2356	-0.3817	-0.0797	0.00316787	5.3822e-85	-0.1145	-1	1	0.717647	0.0768481	-0.9911	NA	NA	0.0276432	0.010823	-0.1151	-0.4285	0.2257	0.512607	1.1949e-58	-0.0603	-0.2087	0.0901	0.427739	2.49947e-69	0.2821
temporal cortex	Left superior temporal gyrus	STG_L	YES	0.0152	-0.1285	0.1575	0.834738	6.58736e-68	0.0602	0.0602	0.5109	0.710045	0.00104448	0.0381	NA	1	0.962702	0.405934	-0.1451	-0.4962	0.2483	0.481987	3.29111e-37	-0.0606	-0.2118	0.0913	0.432501	1.28195e-71	-0.0012	-0.2502	0.2868	0.992554	0.000473519	-0.7501	-1	1	0.48922	0.436219	-0.058	-0.4083	0.3065	0.760755	1.43991e-33	-0.0102	NA	0.135	0.889939	9.59005e-70	0.0197
frontal cortex	Left frontal pole	FP_L	YES	0.0022	-0.128	0.1306	0.653762	2.42934e-78	0.6499	-1	1	0.489795	0.515285	-1	NA	NA	0.237847	0.229662	0.0563	-0.2121	0.3216	0.532908	5.75174e-62	0.0383	-0.1099	0.1836	0.908184	1.10066e-68	0.5485	-1	1	0.145785	0.342678	-1	NA	1	0.173943	0.188051	0.0035	-0.3231	0.3202	0.472852	9.49821e-46	0.0361	-0.1006	0.1712	0.545615	3.17028e-65	-0.2776
temporal cortex	Left temporal pole	TP_L	YES	0.0287	-0.1157	0.1707	0.694945	6.01864e-74	0.053	0.053	0.5973	0.764497	0.0109472	-0.018	-1	1	0.459061	0.615383	-0.0107	-0.3929	0.3392	0.956261	4.37921e-39	-0.0214	-0.1736	0.1329	0.784327	1.53633e-71	0.1291	-1	1	0.563334	0.141329	-0.8908	NA	NA	0.378459	0.349639	-0.1468	-0.4624	0.2195	0.42535	1.74929e-35	-0.0037	-0.1403	0.1344	0.793263	5.62917e-68	0.0754
temporal cortex	Left transverse temporal gyrus	TTG_L	YES	0.0422	-0.1056	0.1877	0.573081	1.52475e-76	-0.0434	-0.7265	0.0397	0.830799	0.0170172	0.534	NA	NA	0.562531	0.575549	0.0736	-0.241	NA	0.645588	4.74017e-43	-0.0394	-0.189	0.1131	0.609819	5.145e-74	-0.1483	-0.765	NA	0.353187	0.00581089	0.648	-1	1	0.52745	0.58693	0.0333	-0.2791	0.3364	0.836674	1.0629e-40	0.0069	-0.141	0.1549	0.927748	5.05089e-67	-0.1495
insular cortex	Left insula	Ins_L	YES	-0.0053	-0.1488	0.1391	0.939719	1.49718e-70	-0.1289	-0.6134	-0.0343	0.485318	0.00690683	0.5214	-1	1	0.373397	0.32951	-0.0447	-0.3905	0.3164	0.752557	6.43952e-43	-0.0739	-0.2225	0.0781	0.644899	1.9165e-70	-0.1983	-0.6898	-0.1983	0.243233	0.0116131	0.1161	-1	1	0.675287	0.296751	0.1028	-0.2059	0.396	0.480087	5.56786e-36	-0.0032	-0.1561	0.1494	0.727393	5.2151e-66	-0.0103
temporal cortex	Right banks of superior temporal gyrus	Bank_R	YES	-0.0176	-0.1523	0.1167	0.542527	1.40409e-76	-0.494	-1	1	0.563815	0.471395	-0.045	-1	1	0.620289	0.184026	0.1441	-0.2082	0.4425	0.295717	6.00981e-43	-0.0518	-0.1941	0.0918	0.211947	2.04893e-85	-0.2289	-1	1	0.392546	0.470864	-0.3108	-1	1	0.405697	0.209749	0.1296	-0.1839	0.4118	0.367133	2.32038e-42	-0.0121	-0.1549	0.1297	0.308787	4.20708e-79	0.096
anterior cingulum	Right caudal anterior cingulate cortex	ACc_R	YES	0.0028	-0.1352	0.1435	0.593081	1.31893e-83	-0.0539	-0.8618	-0.0539	0.805075	0.0102811	-0.1613	-1	1	0.867175	0.542472	0.1643	-0.2192	0.5001	0.313189	8.95756e-36	-0.1294	-0.2652	0.01	0.0649684	1.23486e-81	-0.2605	-1	-0.2605	0.130802	0.0144931	-0.6656	-1	1	0.513021	0.468034	0.2568	-0.1065	0.549	0.145166	2.734e-30	-0.0782	-0.2139	0.0595	0.262817	6.7919e-80	-0.1764
frontal cortex	Right caudal middle frontal gyrus	cMFG_R	YES	0.1082	-0.0281	0.2396	0.283816	1.32866e-73	0.1992	0.1992	1	0.440005	0.0809324	-0.9883	NA	1	0.634808	0.633805	0.1704	-0.1906	0.484	0.334938	1.60598e-36	0.0767	-0.0652	0.2156	0.58147	4.12183e-71	0.2004	0.2004	1	0.327255	0.0733551	-0.9922	NA	1	0.54607	0.567729	0.0834	-0.2777	0.427	0.735011	5.21124e-34	0.0764	-0.0552	0.208	0.244499	5.36314e-74	-0.0343
temporal cortex	Right entorhinal gyrus	Ent_R	YES	0.0363	-0.1025	0.1716	0.681055	1.40962e-73	-0.0158	-1	1	1	0.0765554	0.1866	-1	1	0.888009	0.289995	0.0804	-0.2628	0.4089	0.636254	3.37143e-43	-0.072	-0.223	0.0851	0.381917	5.00302e-68	-0.2065	-1	-0.2065	0.339653	0.026025	0.5877	-1	NA	0.627982	0.849556	0.0214	NA	0.3546	1	1.95543e-35	-0.0833	-0.2214	0.0668	0.294071	9.33106e-72	-0.2955
temporal cortex	Right fusiform gyrus	FG_R	YES	-0.0805	-0.211	0.0534	0.23452	2.03317e-78	-0.0949	-0.6696	NA	0.656999	0.0162754	-0.0102	NA	1	0.995542	0.865843	-0.1157	NA	0.2284	0.511981	2.40623e-50	-0.1294	-0.2707	0.0166	0.0802075	6.86605e-78	-0.1607	-0.7618	-0.1607	0.41147	0.0175717	-0.9163	-1	NA	0.309926	0.28773	0.0519	-0.258	NA	0.74725	5.83894e-47	-0.0291	-0.1691	0.1137	0.686654	5.85237e-72	-0.0865
temporal cortex	Right inferior temporal gyrus	ITG_R	YES	-0.0299	-0.169	0.1084	0.671547	5.91552e-76	-0.0445	-1	1	0.8474	0.0649477	-0.719	-1	NA	0.385346	0.126533	0.2475	-0.1891	0.5788	0.25859	1.00012e-29	-0.1056	-0.2513	0.0442	0.163914	2.95186e-73	0.0637	-1	1	0.800745	0.137729	-0.7803	-1	1	0.183254	0.112272	-0.1255	-0.4406	0.2247	0.484332	3.74156e-46	-0.0956	-0.236	0.048	0.189438	2.59759e-80	0.1308
frontal cortex	Right lateral orbitofrontal gyrus	lOFG_R	YES	0.0945	-0.0509	0.2339	0.537299	6.68516e-69	0.1715	0.1715	0.5632	0.249713	0.000852333	-0.1149	-1	1	0.764468	0.556332	-0.0495	-0.3607	0.2779	0.667863	2.75536e-41	-0.0344	-0.1944	0.125	0.624996	4.75124e-70	0.1096	-0.0724	0.5544	0.487176	0.00189223	-0.7695	NA	1	0.244494	0.115648	-0.0189	-0.3339	0.301	0.636629	4.31954e-37	0.0064	-0.1416	0.1535	0.636086	7.709e-66	-0.0994
frontal cortex	Right medial orbitofrontal gyrus	mOFG_R	YES	0.0481	-0.0934	0.1867	0.501004	2.8112e-71	0.2286	0.1972	0.9544	0.346584	0.035466	-0.5466	-1	1	0.695658	0.56381	-0.104	-0.4188	0.2514	0.537365	3.46058e-45	0.0495	-0.1055	0.2025	0.529892	1.02863e-67	0.2412	0.2412	0.9954	0.235227	0.0592019	-0.6868	NA	1	0.551912	0.436631	-0.157	-0.4481	0.1746	0.335417	4.32347e-45	0.1322	-0.0088	0.2699	0.0641666	2.55894e-66	0.4351
temporal cortex	Right middle temporal gyrus	MTG_R	YES	-0.0182	-0.1675	0.1322	0.811659	5.08254e-68	-0.0754	-0.8782	-0.0754	0.690745	0.00975314	-0.0223	-1	NA	0.96513	0.318519	0.1162	NA	0.4422	0.531578	1.13512e-38	-0.0803	-0.2345	0.0775	0.315021	2.09298e-69	-0.0653	-1	1	0.784797	0.0916829	-0.1893	-1	0.018	0.688705	0.305643	-0.1305	-0.4087	0.181	0.406381	1.88784e-48	0.0184	-0.1332	0.1685	0.810747	3.34087e-70	-0.0348
temporal cortex	Right parahippocampal gyrus	Par_R	YES	0.0365	-0.1034	0.1757	0.60844	6.71485e-71	-0.0751	-1	1	0.740177	0.0518012	0.5974	NA	1	0.526939	0.453756	0.0999	-0.3099	0.4559	0.446612	8.75012e-36	0.0722	-0.0799	0.2221	0.276041	3.86332e-63	-0.0173	-0.7847	0.5628	0.940479	0.0252057	0.6777	NA	1	0.234722	0.283919	-0.0222	-0.3497	0.3264	0.706958	3.86042e-34	0.0914	-0.0561	0.2362	0.168529	2.27296e-61	-0.0464
frontal cortex	Right pars opercularis	Opr_R	YES	0.0688	-0.0691	0.2043	0.324258	3.38504e-70	0.0468	-1	1	0.918568	0.0943618	0.3765	-1	1	0.743215	0.678334	0.1029	-0.244	0.4031	0.695365	5.67748e-49	0.0888	-0.0505	0.2243	0.206221	1.0996e-68	0.2505	-1	1	0.411286	0.218412	-0.0919	NA	1	0.886897	0.467486	-0.0502	-0.3645	0.2788	0.73681	3.40579e-43	0.1345	-0.0036	0.2686	0.0541585	3.29508e-68	0.3289
frontal cortex	Right pars orbitalis	Orb_R	YES	0.0664	-0.0687	0.1981	0.328454	1.43119e-76	0.2132	-1	1	0.468484	0.30554	-0.9991	NA	1	0.29875	0.264746	0.1928	-0.1334	0.4759	0.2436	2.60049e-37	-0.1154	-0.264	0.0371	0.129673	5.75361e-77	-0.0377	-0.8214	0.9487	0.874721	0.0482616	-0.7946	NA	1	0.305679	0.148272	-0.0965	-0.3898	0.2109	0.5248	1.79113e-50	-0.0066	-0.1486	0.1366	0.830425	4.41401e-75	-0.2305
frontal cortex	Right pars triangularis	Tri_R	YES	0.0172	-0.1131	0.1477	0.795367	1.85907e-77	0.3214	-1	1	0.295305	0.143518	-1	NA	1	0.550332	0.550154	-0.1582	NA	0.1894	0.47154	7.63108e-55	-0.059	-0.1988	0.0821	0.760304	1.9742e-82	-0.0674	-0.7116	0.6455	0.584612	0.0393325	-1	NA	1	0.41237	0.41192	0.1044	NA	0.4152	0.625537	3.90076e-38	0.0593	-0.0755	0.1926	0.38493	1.22872e-74	0.1809
anterior cingulum	Right rostral anterior cingulate gyrus	ACr_R	YES	-0.0767	-0.2027	0.0518	0.237291	1.12519e-80	-0.6519	-1	1	0.265548	0.140185	-0.1492	-1	1	0.822226	0.300484	0.2365	-0.12	0.5	0.19503	2.7595e-44	-0.1107	-0.2401	0.0225	0.100061	5.09433e-84	-0.6103	-1	1	0.240658	0.190301	-0.6746	NA	1	0.469991	0.301601	0.0968	-0.2115	0.3938	0.543609	2.2015e-41	-0.0515	-0.1782	0.0792	0.44739	1.03063e-79	-0.3016
frontal cortex	Right rostral middle frontal gyrus	rMFG_R	YES	-0.1599	-0.2908	-0.025	0.019816	9.52308e-84	0.121	NA	0.991	0.762094	0.0610091	-1	NA	1	0.0642992	0.0574354	-0.1264	-0.371	0.1451	0.349305	2.94735e-70	-0.2988	-0.4267	-0.1595	4.12178e-05	2.90674e-88	-0.5078	NA	-0.5078	0.0790719	0.0254196	-1	NA	1	0.0547091	0.0516713	-0.1341	-0.3918	0.1434	0.342481	4.57346e-63	-0.0772	-0.218	0.0479	0.288076	1.14879e-71	0.3236
frontal cortex	Right superior frontal gyrus	SFG_R	YES	0.0625	-0.0763	0.1986	0.373188	6.66868e-75	0.2953	NA	0.8574	0.135042	0.0240694	-1	NA	1	0.708815	0.708386	-0.2556	-0.5572	NA	0.202587	1.23623e-41	-0.1159	-0.264	0.0363	0.132872	6.04943e-80	-0.0719	-0.4224	NA	0.670085	0.0037521	-1	NA	1	0.377706	0.26493	-0.0701	-0.3932	0.271	0.691848	1.99415e-40	0.0108	-0.1335	0.1092	0.883415	3.70016e-76	-0.0714
temporal cortex	Right superior temporal gyrus	STG_R	YES	0.0551	-0.0939	0.1997	0.464486	2.08854e-69	0.2408	NA	0.71	0.184151	0.0152093	-0.8047	NA	1	0.191788	0.0657174	0.0529	-0.3369	0.4368	0.802633	4.50803e-34	0.0433	-0.1151	0.1964	0.58751	1.77293e-67	0.3411	0.3411	0.9238	0.0688178	0.0308347	-0.9006	NA	NA	0.0732135	0.0270174	0.0106	-0.3083	NA	0.950004	7.60264e-35	0.1586	0.0066	0.3031	0.0398952	1.2767e-57	0.2546
frontal cortex	Right frontal pole	FP_R	YES	-0.0481	-0.177	0.0805	0.464404	3.24381e-81	-0.2373	-0.9588	0.5821	0.539094	0.0307209	-1	NA	1	0.296317	0.296231	0.2207	-0.0594	0.4905	0.282182	1.21277e-42	-0.0806	-0.2372	0.0811	0.326812	3.41289e-66	-0.1916	-0.9907	-0.1916	0.395687	0.0221205	-1	NA	1	0.871939	0.829958	0.0897	-0.1999	0.3597	0.541841	1.15824e-51	0.0801	-0.0568	NA	0.247696	1.07415e-61	0.3425
temporal cortex	Right temporal pole	TP_R	YES	-0.0037	-0.1378	0.1287	0.966948	1.11833e-83	0.1022	-0.1582	0.7974	0.699521	0.0134507	-0.9941	NA	-0.8339	0.115248	0.0223584	0.185	-0.1651	0.4834	0.297107	1.7955e-35	-0.0217	-0.1824	0.1373	0.791212	2.81167e-68	0.3143	-0.1011	NA	0.148322	0.166547	-0.9986	NA	1	0.0652267	0.0569967	-0.2165	-0.5124	0.1275	0.212848	8.10358e-43	0.0442	-0.1035	0.189	0.89999	1.71345e-63	0.1401
temporal cortex	Right transverse temporal gyrus	TTG_R	YES	0.089	-0.0441	0.2247	0.176399	1.16836e-72	0.1249	-1	1	0.74611	0.0578833	0.972	-1	NA	0.206283	1	-0.1732	-0.4761	0.2118	0.510167	4.48624e-53	0.1095	-0.0337	0.253	0.127341	7.80727e-64	-0.0387	-1	1	0.961812	0.0888303	0.9847	-1	NA	0.247962	1	0.1928	-0.1911	0.5182	0.32204	1.24253e-27	0.1561	0.015	0.2965	0.0281618	3.83056e-65	0.0236
insular cortex	Right insula	Ins_R	YES	0.0169	-0.1209	0.153	0.713406	4.21511e-74	-0.2796	-1	1	0.592404	0.271261	0.063	-1	1	0.730052	0.450194	0.2552	-0.1337	0.55	0.194068	4.00516e-33	-0.0496	-0.1981	0.1014	0.355521	2.574e-70	-0.2577	-1	1	0.442634	0.25724	0.1304	-1	1	0.707358	0.408598	0.1335	-0.1817	0.4154	0.403294	7.00934e-41	0.014	-0.13	0.1571	0.841684	1.19106e-70	-0.0578
white matter FA	Left anterior thalamic radiation	ATR_L	YES	0.1472	-0.0001	0.2889	0.0488991	8.76837e-63	0.16	-0.1337	0.4807	0.268455	0	0.9608	NA	NA	0.190251	0.82173	-0.1334	NA	0.2171	0.464298	2.62757e-40	0.1778	0.0211	0.3279	0.0255484	4.11468e-61	0.0974	-0.1464	0.3149	0.414329	9.23868e-05	0.985	-1	0.9908	0.139652	0.943933	0.0395	-0.2833	0.3551	0.814502	5.77341e-32	-0.0696	-0.2219	0.0861	0.375498	1.02133e-70	-0.068
white matter FA	Right anterior thalamic radiation	ATR_R	YES	0.1787	0.0287	0.3222	0.0198666	9.74658e-60	0.1551	NA	0.484	0.284757	0	0.6029	-1	1	0.329584	0.258553	0.0197	-0.3839	NA	1	4.37967e-28	0.2268	0.0734	0.3684	0.00399208	9.3907e-55	0.1966	0.1966	0.4551	0.115864	0.00036764	0.6971	-1	1	0.323397	0.256684	0.0353	-0.2602	0.3274	0.840288	1.36775e-35	-0.0346	-0.1887	0.1195	0.658253	3.7035e-69	0.0047
white matter FA	Left corticospinal tract	CST_L	YES	0.1636	0.0147	0.3055	0.0315737	8.4558e-61	0.2188	-0.0905	0.5369	0.146246	0.000228818	0.0766	NA	NA	0.910555	0.223571	0.0571	NA	NA	0.775107	9.84597e-34	0.1073	-0.057	0.2684	0.198412	1.59569e-58	0.0159	-0.2712	0.2794	0.908186	3.91876e-05	0.883	-1	1	0.242158	0.467997	0.026	-0.2972	NA	0.876475	1.30274e-35	0.0476	-0.111	0.2032	0.55309	1.35433e-64	0.1201
white matter FA	right corticospinal tract	CST_R	YES	0.2035	0.0524	0.3453	0.00841348	8.82497e-62	0.2351	-0.0541	0.5138	0.101252	0.000133651	0.2871	NA	NA	0.664549	0.126536	0.0686	-0.3104	0.4161	0.734716	1.26428e-28	0.206	0.0395	0.3641	0.0149641	1.72702e-54	0.171	-0.0566	0.3856	0.135894	9.58626e-06	0.8837	0.0733	NA	0.254333	0.429389	-0.1638	-0.4819	NA	0.354613	1.0191e-36	0.0499	-0.1135	0.2099	0.546074	5.43065e-65	0.2017
white matter FA	Left cingulum (cingulate gyrus)	CGC_L	YES	0.0885	-0.0694	0.2425	0.268443	1.1341e-63	-0.0523	-0.9323	NA	0.804647	0.0391199	0.5154	0.0427	NA	0.296004	0.156752	0.1468	-0.2844	0.5279	0.521531	6.63375e-30	0.219	0.0617	0.3669	0.00641763	2.29063e-53	0.1907	0.1907	0.7277	0.340423	0.0197924	0.7585	0.6073	1	0.0824368	0.0790163	-0.0628	-0.36	0.2449	0.691997	3.48724e-56	-0.0798	-0.2366	0.0807	0.32532	4.61343e-68	-0.116
white matter FA	Right cingulum (cingulate gyrus)	CGC_R	YES	0.0562	-0.0908	0.2004	0.450724	2.05567e-70	-0.0194	-0.4099	0.3071	0.904053	0.000502878	0.9773	-1	NA	0.566846	0.939147	0.1653	-0.2325	NA	0.419859	4.97013e-55	0.1518	0.0028	0.2945	0.0445812	3.39937e-66	0.1046	-0.2007	0.3622	0.454031	0.000276843	0.9611	-1	NA	0.334705	0.813668	0.1909	-0.1862	0.5079	0.316196	6.69721e-25	-0.0434	-0.186	0.1012	0.55353	1.41523e-71	-0.1938
white matter FA	Left cingulum (hippocampus)	CGH_L	YES	0.0377	-0.1086	0.1801	0.609631	6.15558e-68	0.2331	0.2331	0.6593	0.164867	0.000808096	-0.9722	NA	1	0.21001	0.0824349	-0.0673	-0.413	0.296	0.725132	2.00503e-40	0.0894	-0.0634	0.2366	0.246652	1.53992e-71	0.18	0.18	0.5805	0.206885	0.00394023	-0.9809	NA	1	0.611185	0.518777	0.024	-0.2847	0.3243	0.880678	7.42738e-59	-0.0857	-0.2304	0.0609	0.249821	1.85537e-69	0.0686
white matter FA	Right cingulum (hippocampus)	CGH_R	YES	0.0577	-0.092	0.2047	0.447042	9.39407e-68	0.0207	-0.3717	0.3901	0.903551	0.00330586	0.6242	-1	NA	0.475485	0.316496	-0.0111	-0.3791	NA	0.956634	1.71619e-34	-0.0275	-0.182	0.13	0.730674	6.58557e-66	-0.1544	-0.5817	-0.1544	0.375675	0.00355207	0.8748	NA	1	0.300901	0.630374	-0.0722	NA	0.2228	0.635156	1.75277e-51	-0.0263	NA	0.123	0.728406	4.91959e-72	-0.0723
white matter FA	Forceps major	Fmajor	YES	0.129	-0.0239	0.2758	0.0958186	1.00295e-82	-0.0051	-0.4501	0.3025	0.975969	0.00139412	0.7378	-1	1	0.338883	0.378626	0.3039	NA	0.6082	0.130249	5.76162e-46	0.1432	-0.0127	0.2933	0.0700661	9.81898e-66	0.0123	-0.3949	0.3129	0.939751	0.00242922	0.9963	-1	NA	0.192549	0.95627	0.2591	-0.0713	0.5276	0.119657	2.69898e-26	0.0286	-0.128	0.182	0.716834	1.34135e-61	0.0435
white matter FA	Forceps minor	Fminor	YES	0.1712	0.022	0.3137	0.0256444	1.39546e-60	0.111	0.111	0.7109	0.577632	0.0184285	0.6173	NA	1	0.42613	0.408544	0.193	-0.2279	0.4925	0.366857	8.42757e-58	0.2	0.037	0.3542	0.016599	1.56012e-60	0.1255	0.0135	0.4375	0.432864	0.00199514	0.8437	-1	1	0.173613	0.731774	-0.0335	NA	NA	0.834806	6.09042e-36	0.015	-0.1472	0.1751	0.854771	8.67816e-63	0.0591
white matter FA	Left inferior fronto-occipital fasciculus	IFOF_L	YES	0.1484	-0.0033	0.2924	0.0538309	5.13155e-61	0.1468	-0.1613	0.4536	0.32415	0.000150855	1	-1	NA	0.408017	0.997742	0.0473	-0.3565	0.443	0.829726	4.87525e-27	0.1449	-0.0148	0.2978	0.0734359	1.66625e-62	0.0873	-0.1769	NA	0.496321	5.86462e-05	1	-1	NA	0.232968	0.99347	0.099	-0.2193	0.3986	0.544779	4.46598e-30	-0.0723	-0.2216	0.0813	0.351976	5.65934e-81	-0.1584
white matter FA	Right inferior fronto-occipital fasciculus	IFOF_R	YES	0.1147	-0.0351	0.2591	0.130145	1.11652e-66	-0.0028	NA	0.0283	0.988819	0.00170307	1	-1	NA	0.33011	0.459609	0.2797	NA	0.582	0.161556	4.33238e-27	0.1764	0.0189	0.3259	0.0275556	2.17186e-60	0.1242	NA	NA	0.390037	0.00110622	1	-1	NA	0.104665	1	0.0066	-0.3061	NA	0.968328	7.83132e-37	-0.0578	-0.207	0.0944	0.453895	4.75671e-68	-0.0919
white matter FA	Left inferior longitudinal fasciculus	ILF_L	YES	0.1132	-0.0378	NA	0.138212	4.45091e-67	0.1324	NA	0.4605	0.40879	0.0017097	-0.0359	-1	NA	0.968178	0	0.1498	-0.2324	0.4823	0.445405	1.07349e-33	0.0801	-0.0783	0.236	0.319433	1.30071e-67	0.0292	-0.2854	0.0672	0.839791	0.00176352	0.8899	-1	NA	0.468004	0.203336	0.0627	-0.0827	NA	0.710308	8.13841e-47	0.0035	NA	0.1462	0.963876	1.75228e-67	0.1182
white matter FA	Right inferior longitudinal fasciculus	ILF_R	YES	0.0844	-0.0652	NA	0.264959	1.81266e-63	0.0384	NA	0.3195	0.784415	0.000176852	0.1026	NA	NA	0.908684	0.391377	0.2651	-0.1427	0.5853	0.195508	6.37463e-22	0.0618	-0.0987	0.2199	0.450021	5.77609e-64	-0.0045	-0.261	0.2476	1	2.33807e-05	0.634	-1	NA	0.397367	0.380802	0.0604	NA	0.3549	0.701826	4.22571e-41	-0.0991	-0.2441	0.0509	0.191281	1.34372e-72	-0.1624
white matter FA	Left superior longitudinal fasciculus	SLF_L	YES	0.1022	-0.0421	0.2446	0.167632	4.30313e-61	-0.0612	-0.5035	-0.0612	0.713323	0.000941744	0.5527	NA	1	0.421686	0.307702	0.3793	0.006	0.651	0.0473442	1.44097e-38	0.1455	-0.0156	0.3017	0.075858	2.16929e-63	0.0222	-0.2611	0.257	0.864462	0.000804084	0.8461	-0.9994	NA	0.163712	0.314362	0.1962	-0.1503	0.495	0.260202	4.98781e-23	-0.0105	NA	0.1446	0.895806	3.74781e-61	-0.0594
white matter FA	Right superior longitudinal fasciculus	SLF_R	YES	0.191	0.0367	0.3373	0.0150374	5.22883e-76	0.1228	-0.1304	0.373	0.318424	2.37342e-05	0.8397	NA	NA	0.1189	0.451541	0.0513	NA	0.396	0.782701	8.27841e-33	0.1888	0.023	0.3469	0.0250921	2.02558e-52	0.0439	NA	0.2898	0.73043	4.72299e-05	0.8958	0.8794	1	0.0412477	0.435008	-0.0578	NA	0.2804	0.748242	1.12078e-30	0.0285	-0.1306	0.1827	0.724138	9.8249e-62	0.0653
white matter FA	Left uncinate fasciculus	UNC_L	YES	0.0998	-0.0503	0.2454	0.189607	1.46894e-74	0.0947	-0.1832	0.3541	0.467474	1.8493e-05	0.7614	-0.9999	1	0.913864	0.974221	0.1094	-0.2797	0.4749	0.601054	2.96631e-31	0.0443	-0.1109	0.1978	0.581716	1.52661e-73	0.0215	-0.1955	0.0295	0.867936	1.71563e-05	0.9436	-1	1	0.835207	0.91817	0.1379	-0.2277	0.4532	0.451916	0	-0.0685	-0.2142	0.0798	0.372216	4.11954e-70	-0.1775
white matter FA	Right uncinate fasciculus	UNC_R	YES	0.0831	-0.0655	0.2291	0.269921	7.44877e-65	-0.0008	-0.3026	0.2632	0.995442	4.25927e-05	0.716	0.6559	0.9973	0.401198	0.450205	0.1623	-0.2118	0.4835	0.391566	1.44252e-105	0.0404	-0.1108	0.192	0.60033	4.58591e-64	-0.0197	-0.2764	0.2143	0.87134	6.98976e-05	0.8629	NA	NA	0.34584	0.610774	-0.0152	-0.3431	0.3075	0.929831	8.36035e-34	-0.0504	-0.1993	0.0994	0.507488	7.97394e-70	-0.0431
white matter FA	Left superior longitudinal fasciculus (temporal part)	SLFtemp_L	YES	0.0629	-0.0776	0.2011	0.376495	1.0632e-67	-0.2877	-1	NA	0.812919	0.612948	0.2954	-1	NA	0.616669	0.410546	0.1495	-0.1132	0.3891	0.263058	3.77095e-52	0.0377	-0.1021	0.1751	0.59455	8.68086e-70	-0.2962	-1	NA	0.85379	0.621327	0.5204	-1	NA	0.461948	0.417793	0.0319	-0.2315	0.2907	0.815311	1.13434e-65	0.0427	-0.0968	0.1817	0.547899	2.07098e-70	0.037
white matter FA	Right superior longitudinal fasciculus (temporal part)	SLFtemp_R	YES	0.053	-0.0836	0.1875	0.444122	3.68113e-100	-0.0548	-0.9999	0.0025	0.78372	0.0468279	0.3025	-1	NA	0.861372	0.536522	0.2494	-0.0794	0.5176	0.131904	9.58019e-38	-0.0195	-0.1606	0.1218	0.786178	4.66181e-72	-0.1341	-1	1	0.522807	0.0518874	0.3806	NA	1	0.757178	0.473124	0.117	-0.2018	0.4069	0.471078	4.73212e-39	-0.0351	-0.1784	0.109	0.631247	2.26613e-74	-0.063
white matter MD	Left anterior thalamic radiation	ATR_L	YES	-0.0459	-0.1942	0.1068	0.550712	5.37482e-74	-0.1022	-0.4469	0.2398	0.516627	0.000551117	0.3141	-1	NA	0.637239	0.391815	-0.0713	-0.4028	0.2774	0.69384	4.31225e-60	-0.086	-0.2394	0.0722	0.282605	1.138e-68	-0.0497	-0.2072	0.2316	0.71218	0.00117783	0.0084	-1	1	0.992672	0.348631	-0.3723	-0.6139	-0.0555	0.0221627	4.18686e-52	0.0274	-0.1222	0.1773	0.720361	3.92344e-63	-0.0452
white matter MD	Right anterior thalamic radiation	ATR_R	YES	-0.1079	-0.2609	0.0505	0.179374	3.26767e-72	-0.1624	-0.5021	0.2251	0.352254	0.00447092	0.1885	-1	1	0.760028	0.262237	-0.221	-0.525	0.1271	0.210543	1.44883e-48	-0.2183	-0.3654	-0.0602	0.00694951	2.32561e-74	-0.226	-0.5304	-0.1464	0.14867	0.00502231	-0.2826	-1	1	0.801462	0.150599	-0.3384	-0.6034	0.0048	0.0521314	7.43347e-129	-0.0025	-0.1549	0.1508	0.974376	4.73977e-66	-0.1787
white matter MD	Left corticospinal tract	CST_L	YES	-0.0122	NA	NA	0.869614	6.362e-72	0.0471	-0.2588	0.3953	0.76047	0.000321717	-0.4015	NA	NA	0.794394	0.735506	-0.1099	-0.4401	0.0555	0.550554	1.29038e-39	-0.1247	-0.2862	0.0423	0.141416	1.77444e-80	-0.0533	-0.2926	NA	0.698701	0.000224476	-0.9635	NA	NA	0.162593	0.158619	-0.0497	NA	NA	0.775756	1.15986e-32	-0.0949	-0.2437	0.0618	0.229194	1.00617e-66	-0.2718
white matter MD	right corticospinal tract	CST_R	YES	-0.1048	-0.2508	0.0467	0.171762	1.17613e-96	-0.1494	-0.4629	0.1873	0.327192	0.00045968	-0.171	-1	0.9999	0.892098	0.70366	0.0187	-0.3787	0.3746	0.926667	5.92522e-46	-0.1865	-0.3411	-0.0264	0.024073	8.36428e-78	-0.195	-0.4283	NA	0.161756	0.000870554	-0.7357	-1	1	0.579562	0.559403	-0.0121	-0.3279	0.304	0.941793	1.73096e-36	-0.0873	-0.2419	0.0514	0.286603	2.2409e-68	-0.3058
white matter MD	Left cingulum (cingulate gyrus)	CGC_L	YES	-0.0643	-0.2139	0.0896	0.407426	3.32624e-71	-0.3161	-0.7859	-0.0004	0.050333	0.000128405	0.4968	NA	1	0.394996	0.533605	0.3199	-0.0653	0.6088	0.0986866	3.26121e-25	-0.2084	-0.356	-0.0539	0.00907481	5.54112e-83	-0.3048	-0.6411	-0.3048	0.0440525	0.000338882	-0.119	-1	1	0.906081	0.521097	0.0479	-0.2721	0.3522	0.77036	4.07808e-39	0.0366	-0.1241	0.1972	0.654695	7.55668e-63	-0.0402
white matter MD	Right cingulum (cingulate gyrus)	CGC_R	YES	-0.0855	-0.2319	0.0663	0.264804	6.65222e-77	-0.1351	-0.4071	0.1424	0.302	1.02116e-05	0.8421	-0.1534	1	0.408905	0.634236	-0.2252	-0.5488	0.202	0.285908	1.1291e-38	-0.1874	-0.3383	-0.0284	0.0207005	1.92385e-80	-0.1973	-0.4057	0.01	0.109137	7.9039e-06	-0.5112	-1	1	0.602575	0.366653	-0.0107	-0.3548	0.3316	0.952696	7.32649e-32	-0.0197	-0.1686	0.1327	0.797513	4.64181e-71	-0.111
white matter MD	Left cingulum (hippocampus)	CGH_L	YES	-0.0968	-0.2441	0.0587	0.216489	1.7778e-72	-0.2956	-0.7008	NA	0.07806	0.000187808	0.963	NA	NA	0.156901	0.874986	-0.0554	-0.3822	0.2842	0.754513	1.41608e-43	-0.0923	-0.252	0.0729	0.270109	6.32702e-71	-0.1943	-0.5081	-0.1697	0.170374	0.000690623	0.8374	0.8374	NA	0.645548	0.883417	0.1407	NA	0.4583	0.43399	1.03915e-27	-0.0507	NA	0.1011	0.506588	8.42386e-70	-0.2515
white matter MD	Right cingulum (hippocampus)	CGH_R	YES	-0.0257	-0.1813	0.1316	0.748138	1.45294e-70	-0.0161	-0.4026	0.4749	0.931846	0.00113083	0.2121	-1	NA	0.741052	0.267101	-0.1715	-0.5358	0.2377	0.422419	5.07155e-42	-0.0603	-0.225	0.1089	0.483198	8.73573e-65	-0.1259	-0.3089	-0.0495	0.423187	0.00113637	0.9941	-1	NA	0.460072	0.776718	-0.1458	-0.4602	NA	0.416968	3.34715e-34	-0.0215	-0.1725	0.1314	0.782401	2.90968e-63	-0.0772
white matter MD	Forceps major	Fmajor	YES	-0.1111	-0.2645	0.0494	0.170694	1.47065e-71	-0.2415	-0.7088	NA	0.164192	0.00173963	0.1473	NA	0.9182	0.716179	0.0418436	-0.0413	-0.3478	0.2656	0.796969	3.37245e-55	-0.1122	-0.2629	0.0417	0.151312	8.20683e-79	0.0188	-0.0173	0.525	0.91674	0.00843901	-0.5398	NA	1	0.25097	0.0773765	-0.1735	-0.4489	0.1358	0.26658	3.94057e-55	0.0123	-0.1407	0.1661	0.875085	2.74849e-66	-0.1236
white matter MD	Forceps minor	Fminor	YES	-0.0857	-0.2424	0.0774	0.298366	3.23292e-69	-0.0958	-0.394	0.2504	0.550348	0.000144848	0.1713	-0.9969	NA	0.687139	0.124336	-0.378	NA	0.0773	0.101592	5.89369e-54	-0.2216	-0.3696	-0.0588	0.00799677	1.06913e-70	-0.4063	-0.6776	-0.4063	0.00214914	7.43835e-06	0.5739	-0.9983	1	0.400371	0.146408	0.1529	-0.1957	NA	0.405688	3.66288e-24	0.048	-0.1036	0.201	0.528307	7.76531e-59	-0.0466
white matter MD	Left inferior fronto-occipital fasciculus	IFOF_L	YES	-0.074	-0.2258	0.0838	0.352388	6.82156e-69	-0.1424	-0.3722	-0.0217	0.199484	6.88163e-08	0.1659	-1	1	0.759528	0.363716	0.1019	-0.2721	NA	0.605627	3.47312e-32	-0.1506	-0.3062	0.0148	0.0721605	6.67038e-72	-0.1855	-0.3892	0.0289	0.0880995	3.31404e-08	0.2481	-1	1	0.773285	0.324526	-0.1306	-0.4417	0.2119	0.412765	2.51641e-28	0.0464	-0.1047	0.1974	0.547296	7.42493e-60	-0.017
white matter MD	Right inferior fronto-occipital fasciculus	IFOF_R	YES	-0.0761	-0.2345	0.0896	0.362654	3.83131e-70	-0.1013	-0.1013	0.3028	0.521497	0.000406862	0.1492	-1	1	0.798492	0.299508	-0.1645	-0.5866	0.1347	0.482567	2.07493e-34	-0.1844	-0.3302	-0.0268	0.0216135	5.91273e-77	-0.2618	-0.6014	-0.2618	0.0812086	0.000523925	0.4999	NA	1	0.818301	0.619555	-0.1541	-0.48	0.2362	0.427322	1.64395e-36	0.0865	-0.0649	0.2357	0.25045	5.53987e-58	0.0934
white matter MD	Left inferior longitudinal fasciculus	ILF_L	YES	-0.0949	-0.2441	0.0625	0.231073	7.45751e-72	-0.13	-0.3564	0.1322	0.291594	3.12538e-07	0.4941	-1	1	0.508762	0.38809	-0.3209	-0.5641	0.0504	0.0883171	4.41155e-40	-0.1944	-0.3471	-0.0294	0.0208165	2.90474e-72	-0.3553	-0.6154	NA	0.0114491	4.27168e-07	0.6986	-1	1	0.529893	0.698163	0.1967	-0.1524	0.5012	0.265047	5.83401e-24	0.0137	-0.1381	0.167	0.859839	2.40507e-64	-0.1112
white matter MD	Right inferior longitudinal fasciculus	ILF_R	YES	-0.0967	-0.2406	0.0523	0.200342	5.1417e-73	-0.1555	-0.3879	0.0682	0.170735	0	0.4349	NA	NA	0.734607	0.715478	0.0349	-0.3419	0.3558	0.851488	2.01744e-33	-0.1417	-0.2916	0.0147	0.0741326	1.54902e-77	-0.2028	-0.4653	0.0521	0.111171	4.79439e-06	0.9996	-1	NA	0.858363	0.99456	0.0136	-0.3231	0.1629	0.938997	6.31648e-33	0.0551	-0.0959	0.2053	0.471918	1.33722e-61	0.0171
white matter MD	Left superior longitudinal fasciculus	SLF_L	YES	-0.1174	-0.2639	0.0354	0.129078	2.71694e-73	-0.1033	-0.3649	0.2604	0.479752	8.89774e-05	-0.1522	-1	1	0.891342	0.00958763	-0.1808	-0.5641	0.219	0.397984	0	-0.1497	-0.3052	0.0118	0.0679084	1.04692e-79	-0.1364	-0.4065	0.1729	0.36561	8.87488e-05	-0.324	-1	1	0.664625	0.238183	-0.1128	-0.4261	0.2237	0.511381	6.06871e-39	0.0437	-0.111	0.1982	0.579489	5.64992e-61	0.0292
white matter MD	Right superior longitudinal fasciculus	SLF_R	YES	-0.1232	-0.2681	0.0303	0.112412	1.04361e-82	-0.1982	-0.5016	NA	0.191498	1.12869e-05	0.4544	-1	NA	0.761577	0.0227318	0.0326	-0.4817	NA	0.90531	3.841e-31	-0.2317	-0.3757	-0.0782	0.00325666	1.52843e-77	-0.226	-0.4243	-0.226	0.0367611	2.75075e-06	-0.7348	NA	1	0.545192	0.491687	-0.1057	NA	0.2351	0.547682	0	0.0208	-0.1351	0.1774	0.793222	6.30338e-64	-0.0413
white matter MD	Left uncinate fasciculus	UNC_L	YES	-0.0848	-0.2307	0.0677	0.269888	3.75016e-71	-0.2001	-0.5601	0.0664	0.14479	9.14797e-05	0.2025	-1	1	0.775211	0.261176	0.22	NA	0.5223	0.239628	2.77829e-44	-0.1405	-0.2932	0.0207	0.0852185	8.94688e-77	-0.2651	-0.5446	-0.2651	0.0466992	1.96028e-05	0.4902	-1	1	0.560932	0.358679	0.1241	-0.2269	0.4447	0.488093	2.58248e-42	0.0797	-0.0735	0.2308	0.304922	6.62098e-61	0.0961
white matter MD	Right uncinate fasciculus	UNC_R	YES	-0.0928	-0.2395	0.0606	0.229997	1.03052e-73	-0.2577	-0.9671	-0.2577	0.239868	0.0139175	0.5072	-1	1	0.408951	0.486312	-0.1333	-0.4706	0.2281	0.475911	1.6147e-50	-0.1729	-0.3228	-0.0131	0.0331253	1.09547e-72	-0.261	-0.5453	-0.261	0.0411476	3.85272e-05	-0.0007	-1	1	0.999782	0.687248	0.1407	-0.1931	0.4459	0.40827	1.01511e-33	0.0513	-0.0972	0.1994	0.497236	1.33609e-60	0.0106
white matter MD	Left superior longitudinal fasciculus (temporal part)	SLFtemp_L	YES	-0.1085	-0.2512	0.0395	0.146911	3.77044e-74	-0.1303	-1	1	0.609116	0.0659448	-0.1791	-1	0.8869	0.836655	0.389144	-0.1055	-0.4142	0.2222	0.539935	2.67337e-63	-0.1288	-0.2968	0.0504	0.156736	6.30335e-72	-0.572	-1	1	0.140628	0.0216507	0.0062	-1	1	0.992394	0.315845	0.3075	-0.0529	0.5877	0.0911352	7.94002e-26	-0.0239	-0.173	0.1254	0.753384	1.44875e-66	-0.0854
white matter MD	Right superior longitudinal fasciculus (temporal part)	SLFtemp_R	YES	-0.1024	-0.2493	0.0505	0.185211	2.17462e-70	-0.0533	-0.0533	0.6461	0.82372	0.0143345	-0.2075	-1	-0.2075	0.735482	0.297419	-0.192	-0.514	0.1818	0.311713	1.86941e-43	-0.137	-0.2993	0.0338	0.113432	1.19992e-70	-0.0925	-0.0925	0.2855	0.54554	0.00907664	-0.8471	-1	1	0.622144	0.326338	-0.3039	-0.606	0.1044	0.13902	2.91435e-34	0.0598	-0.0939	0.2117	0.442685	3.18766e-63	0.2408
[truncated: 38 more columns]

## Sheet: Associations YSR
				Assessment #1: 10 years																				Assessment #2: 13 years																				Assessment #3: 18 years
Brain measure				Phenotypic association					Genetic association					Common environment association					Unique environment association					Phenotypic association					Genetic association					Common environment association					Unique environment association					Phenotypic association					Genetic association
atlas	region	abbreviation	correct global brain	estimate	lower CI	upper CI	p-value (0)	p-value (1)	estimate	lower CI	upper CI	p-value (0)	p-value (1)	estimate	lower CI	upper CI	p-value (0)	p-value (1)	estimate	lower CI	upper CI	p-value (0)	p-value (1)	estimate	lower CI	upper CI	p-value (0)	p-value (1)	estimate	lower CI	upper CI	p-value (0)	p-value (1)	estimate	lower CI	upper CI	p-value (0)	p-value (1)	estimate	lower CI	upper CI	p-value (0)	p-value (1)	estimate	lower CI	upper CI	p-value (0)	p-value (1)	estimate
global	Total brain volume	TBV	NO	–	–	–	–	–	–	–	–	–	–	–	–	–	–	–	–	–	–	–	–	-0.128	-0.2696	0.0194	0.0869548	1.33712e-76	-0.1362	-0.1596	-0.107	0.181204	5.23817e-05	1	-1	NA	0.702967	0.998627	-0.2226	-0.5467	0.1761	0.268367	3.23397e-39	-0.0247	-0.1645	0.1169	0.731817	2.36141e-69	-0.0656
global	Global white matter mean fractional anisotropy	GFA	NO	–	–	–	–	–	–	–	–	–	–	–	–	–	–	–	–	–	–	–	–	0.1775	0.0192	0.3279	0.0288194	4.82016e-52	0.4229	0.4229	0.9904	0.038007	0.0458382	0.7417	-1	1	0.593308	0.533599	-0.3594	-0.6217	0.0007	0.0503276	1.35207e-46	0.13	-0.0182	0.2726	0.0883943	4.50162e-57	0.3163
global	Global white matter mean diffusivity	GMD	NO	–	–	–	–	–	–	–	–	–	–	–	–	–	–	–	–	–	–	–	–	-0.1953	-0.3434	-0.0364	0.0159567	6.02653e-70	-0.3287	-0.7711	-0.2786	0.0313794	0.000202646	-0.2927	-1	1	0.784577	0.304172	0.2233	-0.1634	0.5413	0.251562	1.05275e-27	-0.1977	-0.3362	-0.0498	0.0100365	2.30815e-70	-0.5615
global	Total cortical gray matter volume	CGM	YES	–	–	–	–	–	–	–	–	–	–	–	–	–	–	–	–	–	–	–	–	-0.1667	-0.3158	-0.0089	0.0375228	8.30482e-68	-0.2015	-0.5853	0.135	0.209257	0.000146455	0.9824	NA	NA	0.960135	1	-0.1207	-0.4596	0.2351	0.498137	4.0092e-45	0.0468	-0.0967	0.1889	0.506691	1.06386e-62	0.0849
global	Total subcortical gray matter volume	SGM	YES	–	–	–	–	–	–	–	–	–	–	–	–	–	–	–	–	–	–	–	–	-0.07	-0.219	0.0841	0.38322	3.08988e-71	-0.1415	-0.601	-0.1415	0.35949	0.000663303	-0.7273	-1	1	0.633756	0.265649	0.1945	-0.1372	0.4977	0.243076	3.28405e-28	-0.1289	-0.2673	0.0153	0.0919364	1.43417e-75	-0.0764
global	Total cortical white matter volume	WMV	YES	–	–	–	–	–	–	–	–	–	–	–	–	–	–	–	–	–	–	–	–	0.2023	0.0421	0.3521	0.0136257	3.72526e-59	0.2157	0.2157	0.6689	0.224056	0.00301397	0.8061	-1	1	0.703828	0.860729	0.1564	-0.2232	0.5027	0.414667	4.98175e-23	-0.0011	-0.1413	0.1385	0.889209	3.10284e-68	0.0206
subcortical	Left putamen	PUT_L	YES	–	–	–	–	–	–	–	–	–	–	–	–	–	–	–	–	–	–	–	–	-0.0414	-0.1902	0.107	0.574503	3.24095e-71	-0.1352	-0.5443	-0.1352	0.406448	0.000235288	-1	NA	1	0.772983	0.74062	0.2375	-0.1566	0.5493	0.226552	4.47492e-26	-0.109	-0.2444	0.0302	0.118842	3.41972e-78	0.08
subcortical	Left hippocampus	HIP_L	YES	–	–	–	–	–	–	–	–	–	–	–	–	–	–	–	–	–	–	–	–	-0.0284	-0.19	0.1294	0.668208	1.82168e-68	0.0078	-0.5023	0.0078	1	0.00292472	-0.9998	NA	1	0.202387	0.209622	0.1858	-0.1779	0.5181	0.306348	7.21641e-28	-0.0593	-0.2008	0.0882	0.441519	7.65062e-71	0.209
subcortical	Left amygdala	AMY_L	YES	–	–	–	–	–	–	–	–	–	–	–	–	–	–	–	–	–	–	–	–	-0.0094	-0.1665	0.1488	0.907302	8.67606e-62	-0.0572	-1	1	0.812344	0.205454	0.9996	-1	NA	0.925334	1	0.0353	-0.2891	0.35	0.459454	9.84219e-48	-0.1344	-0.2698	0.0063	0.058928	1.8353e-73	-0.3188
subcortical	Right putamen	PUT_R	YES	–	–	–	–	–	–	–	–	–	–	–	–	–	–	–	–	–	–	–	–	-0.0337	-0.1909	0.1204	0.68395	1.94012e-64	-0.0817	-0.4199	NA	0.637469	9.42946e-05	-0.6307	-1	1	0.82117	1	0.1726	-0.2035	0.4919	0.374786	3.51881e-28	-0.0924	-0.229	0.0461	0.191707	2.15746e-78	-0.2872
subcortical	Right hippocampus	HIP_R	YES	–	–	–	–	–	–	–	–	–	–	–	–	–	–	–	–	–	–	–	–	-0.086	-0.2379	0.0691	0.274032	2.37587e-78	-0.0139	-0.0139	0.3591	0.885552	0.000807648	-1	NA	1	0.387225	0.321249	-0.1154	-0.454	0.2642	0.552178	1.67041e-36	-0.0277	-0.1728	0.1192	0.69183	7.52678e-78	0.0556
subcortical	Right amygdala	AMY_R	YES	–	–	–	–	–	–	–	–	–	–	–	–	–	–	–	–	–	–	–	–	-0.1601	-0.3021	-0.0087	0.0368957	7.55063e-73	-0.2136	-0.7125	0.2108	0.259851	0.0132418	-1	NA	1	0.831778	0.831775	-0.0669	-0.3827	0.255	0.691375	1.38646e-45	-0.1276	-0.2625	NA	0.072987	2.53928e-73	-0.2862
temporal cortex	Left banks of superior temporal gyrus	Bank_L	YES	–	–	–	–	–	–	–	–	–	–	–	–	–	–	–	–	–	–	–	–	-0.2089	-0.3438	-0.0649	0.00465442	4.26087e-88	-0.3044	-0.9999	-0.3044	0.156095	0.0115536	0.9846	-1	NA	1	1	-0.1247	-0.4547	0.2385	0.505987	2.94622e-41	-0.0336	-0.1712	0.106	0.624801	5.07884e-77	-0.0855
anterior cingulum	Left caudal anterior cingulate cortex	ACc_L	YES	–	–	–	–	–	–	–	–	–	–	–	–	–	–	–	–	–	–	–	–	-0.1704	-0.3095	-0.0242	0.0220673	5.05244e-77	-0.2263	-1	-0.2074	0.283345	0.0456836	1	-1	NA	0.908454	1	-0.1477	-0.47	0.2045	0.408793	1.26362e-57	0	-0.1349	0.1351	1	3.59329e-73	0.0017
frontal cortex	Left caudal middle frontal gyrus	cMFG_L	YES	–	–	–	–	–	–	–	–	–	–	–	–	–	–	–	–	–	–	–	–	-0.1774	-0.318	-0.0303	0.0182168	1.92301e-80	-0.6582	-1	1	0.117682	0.0768792	-0.3927	-1	1	0.828841	0.959688	0.0325	-0.2708	0.3168	0.782514	1.20196e-57	-0.0621	-0.1977	0.0757	0.357047	3.24168e-73	-0.7425
temporal cortex	Left entorhinal gyrus	Ent_L	YES	–	–	–	–	–	–	–	–	–	–	–	–	–	–	–	–	–	–	–	–	-0.0855	-0.2321	0.0659	0.213781	3.74509e-68	-0.1289	-1	-0.1289	0.297277	0.0610339	-0.9	NA	0.9998	0.440098	0.999196	-0.0468	-0.352	0.2608	0.772205	1.39632e-51	-0.0735	-0.2129	0.0684	0.309685	6.27649e-71	-0.1023
temporal cortex	Left fusiform gyrus	FG_L	YES	–	–	–	–	–	–	–	–	–	–	–	–	–	–	–	–	–	–	–	–	-0.1228	-0.2691	0.0327	0.118943	3.64137e-70	-0.2068	-1	-0.2068	0.402837	0.0435947	-1	NA	1	0.734409	0	-0.0371	-0.4345	0.3232	0.854395	1.11599e-48	-0.0356	-0.1707	0.1001	0.605917	1.25616e-72	-0.3192
temporal cortex	Left inferior temporal gyrus	ITG_L	YES	–	–	–	–	–	–	–	–	–	–	–	–	–	–	–	–	–	–	–	–	-0.1525	-0.2963	-0.002	0.0470215	1.00503e-71	-0.1484	-1	-0.1484	0.500117	0.0384101	-1	NA	1	0.357667	0.122357	-0.0734	-0.4154	0.2644	0.684154	1.64293e-49	0.0354	-0.1082	0.1779	0.628145	2.87512e-65	0.0277
frontal cortex	Left lateral orbitofrontal gyrus	lOFG_L	YES	–	–	–	–	–	–	–	–	–	–	–	–	–	–	–	–	–	–	–	–	-0.1962	-0.3368	-0.0459	0.0103812	2.8721e-74	-0.2501	-0.6592	-0.2501	0.12861	0.00018792	1	-1	NA	0.73402	0.997496	-0.1727	-0.4616	0.1378	0.262149	3.68555e-67	-0.0452	-0.182	0.0925	0.493193	1.38444e-70	-0.2535
frontal cortex	Left medial orbitofrontal gyrus	mOFG_L	YES	–	–	–	–	–	–	–	–	–	–	–	–	–	–	–	–	–	–	–	–	-0.0275	-0.1839	0.1277	0.856163	1.19709e-66	-0.0454	-0.5481	-0.0454	0.732641	0.010351	0.9583	-0.9999	NA	1	1	-0.0071	-0.3557	0.3233	1	6.6862e-42	-0.0094	-0.1497	0.1319	1	6.30384e-72	-0.1971
temporal cortex	Left middle temporal gyrus	MTG_L	YES	–	–	–	–	–	–	–	–	–	–	–	–	–	–	–	–	–	–	–	–	-0.268	-0.4006	-0.1236	0.000367443	1.76563e-76	-0.4233	-0.989	-0.4233	0.0979021	0.00783096	-0.9314	-1	1	0.720642	0.332722	-0.0929	-0.4002	0.2245	0.574086	1.43797e-61	-0.0752	-0.2152	0.067	0.299756	1.90211e-69	-0.5932
temporal cortex	Left parahippocampal gyrus	Par_L	YES	–	–	–	–	–	–	–	–	–	–	–	–	–	–	–	–	–	–	–	–	-0.0951	-0.251	0.0667	0.245883	3.84886e-68	-0.2085	-0.6494	-0.2085	0.263174	0.00590034	-0.9902	NA	1	0.765656	0.765618	0.2061	-0.2059	0.5235	0.313208	2.10479e-29	-0.1231	-0.2593	0.0178	0.280771	7.30157e-76	0.0758
frontal cortex	Left pars opercularis	Opr_L	YES	–	–	–	–	–	–	–	–	–	–	–	–	–	–	–	–	–	–	–	–	-0.1214	-0.2657	0.0285	0.109921	6.53815e-76	-0.1291	-1	1	0.528576	0.0799571	0.739	-1	NA	1	1	-0.1397	-0.5007	0.2755	0.488936	1.04831e-49	0.0026	-0.1366	0.1436	1	2.70208e-72	-0.2086
frontal cortex	Left pars orbitalis	Orb_L	YES	–	–	–	–	–	–	–	–	–	–	–	–	–	–	–	–	–	–	–	–	-0.0703	-0.218	0.0816	0.335998	3.35651e-76	0.06	-1	1	0.819859	0.054812	-0.9998	NA	1	0.907401	0.2984	-0.2308	-0.5457	0.1347	0.207887	2.60372e-58	-0.0223	-0.1622	0.116	0.625061	2.60253e-73	-0.4571
frontal cortex	Left pars triangularis	Tri_L	YES	–	–	–	–	–	–	–	–	–	–	–	–	–	–	–	–	–	–	–	–	-0.0672	-0.2154	0.0851	0.523109	6.12317e-78	-0.0191	-1	1	0.917259	0.0736324	1	-1	NA	0.91551	0.999314	-0.1642	-0.4529	0.1669	0.314118	1.79879e-50	-0.0406	-0.1771	0.0982	0.565253	9.49808e-70	0.1075
anterior cingulum	Left rostral anterior cingulate gyrus	ACr_L	YES	–	–	–	–	–	–	–	–	–	–	–	–	–	–	–	–	–	–	–	–	-0.177	-0.3183	-0.029	0.0189374	4.87058e-80	-0.3427	-1	0.0169	0.171408	0.0651563	-0.6513	-1	1	0.742383	0.68706	0.0432	-0.2642	0.3322	0.833135	6.18645e-51	-0.0611	-0.198	0.077	0.391762	7.77783e-80	0.1414
frontal cortex	Left rostral middle frontal gyrus	rMFG_L	YES	–	–	–	–	–	–	–	–	–	–	–	–	–	–	–	–	–	–	–	–	-0.1838	-0.3199	-0.0378	0.0136125	1.06236e-75	-0.3886	-0.7282	-0.1153	0.0063659	4.03407e-06	-0.606	-1	1	1	0.999805	0.2755	-0.05	0.5251	0.0913661	1.37414e-44	-0.0439	-0.1856	0.1009	0.550287	2.35108e-69	0.0607
frontal cortex	Left superior frontal gyrus	SFG_L	YES	–	–	–	–	–	–	–	–	–	–	–	–	–	–	–	–	–	–	–	–	-0.0894	-0.2424	0.0671	0.252296	1.89215e-68	-0.4444	-1	1	0.491243	0.317855	-1	NA	1	0.504457	0.504428	0.0896	-0.2109	0.3655	0.555488	5.30096e-46	-0.0297	-0.171	0.1126	0.681405	2.91423e-69	-0.2843
temporal cortex	Left superior temporal gyrus	STG_L	YES	–	–	–	–	–	–	–	–	–	–	–	–	–	–	–	–	–	–	–	–	-0.1173	-0.2644	0.0366	0.132566	1.82366e-69	-0.0748	-0.0748	0.1039	0.56365	0.000378578	1	-1	NA	0.833746	1	-0.2604	-0.5519	0.0873	0.141489	7.60309e-49	0.0471	-0.0931	0.1867	0.511519	1.42357e-65	-0.0814
frontal cortex	Left frontal pole	FP_L	YES	–	–	–	–	–	–	–	–	–	–	–	–	–	–	–	–	–	–	–	–	0.0279	-0.12	0.1744	0.710967	4.15912e-63	-0.067	-1	1	0.729208	0.264718	-1	NA	1	0.717956	0.62987	0.0886	-0.2206	0.3797	0.507173	8.69761e-39	0.1624	0.0289	0.2893	0.0166157	7.71687e-63	-0.0453
temporal cortex	Left temporal pole	TP_L	YES	–	–	–	–	–	–	–	–	–	–	–	–	–	–	–	–	–	–	–	–	0.0152	-0.1348	0.166	0.842757	7.86935e-64	-0.1487	-1	1	0.61048	0.0877862	-1	NA	1	0.519688	0.546199	0.213	-0.0906	0.471	0.162783	2.26333e-35	-0.0122	-0.1508	0.1278	0.733263	1.5618e-70	0.1269
temporal cortex	Left transverse temporal gyrus	TTG_L	YES	–	–	–	–	–	–	–	–	–	–	–	–	–	–	–	–	–	–	–	–	-0.0648	-0.2156	0.09	0.409115	9.76122e-67	-0.0077	-1	0.9999	0.975046	0.0862382	0.9999	-1	NA	0.892195	1	-0.1937	-0.472	0.1276	0.232087	3.85554e-57	0.0205	-0.1207	0.16	0.773718	5.78439e-67	-0.4274
insular cortex	Left insula	Ins_L	YES	–	–	–	–	–	–	–	–	–	–	–	–	–	–	–	–	–	–	–	–	-0.1906	-0.3341	-0.0349	0.0197882	1.59634e-77	-0.1709	-1	1	0.471029	0.0557834	-0.9917	NA	1	0.408489	0.496121	-0.186	-0.4679	0.1303	0.248861	6.4133e-63	0.0128	-0.1342	0.1584	1	5.89885e-64	-0.2427
temporal cortex	Right banks of superior temporal gyrus	Bank_R	YES	–	–	–	–	–	–	–	–	–	–	–	–	–	–	–	–	–	–	–	–	-0.1404	-0.2836	0.0083	0.0609241	1.10635e-74	-0.172	-1	NA	0.506884	0.0367862	-0.724	-1	1	1	0.531196	-0.171	-0.4353	0.1159	0.236295	2.0466e-64	0.045	-0.0937	0.1805	0.520932	1.63201e-66	-0.5363
anterior cingulum	Right caudal anterior cingulate cortex	ACc_R	YES	–	–	–	–	–	–	–	–	–	–	–	–	–	–	–	–	–	–	–	–	-0.0299	-0.1746	0.1152	0.686089	6.77233e-72	-0.158	-1	0.2055	0.483069	0.150698	-1	NA	1	0.66752	0.754346	0.1575	-0.2142	0.4837	0.390008	1.66517e-27	0.0656	-0.07	0.2	0.324048	6.57952e-66	0.2549
frontal cortex	Right caudal middle frontal gyrus	cMFG_R	YES	–	–	–	–	–	–	–	–	–	–	–	–	–	–	–	–	–	–	–	–	0.1065	-0.042	0.2494	0.15462	2.31328e-71	-0.0987	-1	1	0.7116	0.19689	-1	NA	1	0.868219	0.769295	0.3471	-0.012	0.6048	0.0554358	2.76362e-27	0.0468	-0.0883	0.1804	0.486622	2.41769e-71	-0.0834
temporal cortex	Right entorhinal gyrus	Ent_R	YES	–	–	–	–	–	–	–	–	–	–	–	–	–	–	–	–	–	–	–	–	-0.0488	-0.2017	0.1105	0.56136	7.76739e-64	-0.1642	-1	1	0.68557	0.316748	-0.8263	-1	1	0.844152	0.47138	0.0481	-0.3144	0.3829	0.791371	3.31658e-42	-0.1249	-0.2588	0.0174	0.0841617	4.36438e-73	-0.2079
temporal cortex	Right fusiform gyrus	FG_R	YES	–	–	–	–	–	–	–	–	–	–	–	–	–	–	–	–	–	–	–	–	-0.1323	-0.2729	0.0132	0.0743519	4.19519e-70	-0.2153	-0.9955	-0.2153	0.300614	6.7372e-05	-1	NA	1	0.81366	0.77683	-0.0649	-0.3496	0.2289	0.670272	6.70067e-56	0.0091	-0.1295	0.1481	0.90505	1.32054e-65	0.1835
temporal cortex	Right inferior temporal gyrus	ITG_R	YES	–	–	–	–	–	–	–	–	–	–	–	–	–	–	–	–	–	–	–	–	-0.142	-0.2872	0.0099	0.0664627	9.20127e-71	-0.6047	-1	-0.6047	0.127416	0.113452	-1	NA	1	0.901613	0.900699	0.1839	-0.1887	0.4909	0.324065	6.81009e-33	-0.0261	-0.1618	0.1103	0.710483	6.07314e-72	0.0548
frontal cortex	Right lateral orbitofrontal gyrus	lOFG_R	YES	–	–	–	–	–	–	–	–	–	–	–	–	–	–	–	–	–	–	–	–	-0.0006	-0.1555	0.1534	0.834956	2.52393e-61	-0.0468	-0.9998	-0.0468	0.796959	0.0330407	-0.3562	-1	1	0.739805	0.37529	0.084	-0.2398	0.3772	0.606389	1.76432e-43	0.0082	-0.1363	0.1476	0.790689	6.23299e-67	-0.5322
frontal cortex	Right medial orbitofrontal gyrus	mOFG_R	YES	–	–	–	–	–	–	–	–	–	–	–	–	–	–	–	–	–	–	–	–	0.0017	-0.1529	0.1583	0.982464	5.30933e-65	0.2787	-1	1	0.374823	0.432002	-0.9814	NA	1	0.71312	0.713081	-0.1955	-0.5098	0.147	0.269268	5.56856e-56	0.05	-0.0876	0.1867	0.474659	7.06095e-68	0.5089
temporal cortex	Right middle temporal gyrus	MTG_R	YES	–	–	–	–	–	–	–	–	–	–	–	–	–	–	–	–	–	–	–	–	-0.0672	-0.2211	0.093	0.405901	1.15178e-67	-0.2648	-1	NA	0.457181	0.209334	1	-1	NA	0.355026	1	-0.191	-0.4831	0.1446	0.260648	8.44864e-63	0.0387	-0.1126	0.1882	0.615567	2.5744e-64	-0.5296
temporal cortex	Right parahippocampal gyrus	Par_R	YES	–	–	–	–	–	–	–	–	–	–	–	–	–	–	–	–	–	–	–	–	-0.0776	-0.2256	0.0745	0.294854	3.24705e-67	-0.2047	-1	1	0.523559	0.0634724	-0.2135	-1	NA	0.949275	0.780419	0.0089	-0.3895	0.3529	0.664916	5.35492e-48	-0.0165	-0.159	0.126	0.686836	4.47521e-67	-0.5322
frontal cortex	Right pars opercularis	Opr_R	YES	–	–	–	–	–	–	–	–	–	–	–	–	–	–	–	–	–	–	–	–	0.0392	-0.1086	0.1836	0.597637	1.27062e-67	-0.0871	-1	1	0.819074	0.0609091	0.9975	-1	NA	0.654642	1	0.1066	-0.2243	0.4187	0.531036	4.31629e-37	-0.005	-0.144	0.1321	1	3.20123e-79	-0.6354
frontal cortex	Right pars orbitalis	Orb_R	YES	–	–	–	–	–	–	–	–	–	–	–	–	–	–	–	–	–	–	–	–	-0.0691	-0.2205	0.0815	0.347596	2.58475e-67	-0.0161	-1	1	0.859646	0.443796	-1	NA	1	0.995011	0.521387	-0.1489	-0.4478	0.165	0.340365	2.03789e-62	0.03	-0.1072	0.1671	0.660707	7.52152e-67	0.0797
frontal cortex	Right pars triangularis	Tri_R	YES	–	–	–	–	–	–	–	–	–	–	–	–	–	–	–	–	–	–	–	–	-0.0043	-0.1523	0.1401	1	1.36267e-69	-0.1079	-1	1	0.681874	0.16554	0.9957	-1	NA	0.886614	1	0.0869	-0.2821	0.4715	0.649362	1.22196e-35	-0.0347	-0.169	0.0994	0.637648	8.63361e-73	-0.0466
anterior cingulum	Right rostral anterior cingulate gyrus	ACr_R	YES	–	–	–	–	–	–	–	–	–	–	–	–	–	–	–	–	–	–	–	–	0.0315	-0.1079	0.1713	0.672228	2.1837e-71	-0.1992	-1	1	0.717288	0.451961	-0.9966	NA	1	1	1	0.1462	-0.1676	0.4196	0.349754	8.84823e-48	-0.0336	-0.1674	0.0984	0.616869	1.3682e-76	-0.6252
frontal cortex	Right rostral middle frontal gyrus	rMFG_R	YES	–	–	–	–	–	–	–	–	–	–	–	–	–	–	–	–	–	–	–	–	-0.1832	-0.3225	-0.0358	0.0146306	4.86994e-76	-0.5755	-1	-0.5755	0.0200323	0.00902727	-1	NA	1	0.972224	0.972201	0.1609	-0.123	0.4132	0.261505	4.50981e-46	-0.0438	-0.1816	0.0966	0.540504	9.63947e-69	0.2974
frontal cortex	Right superior frontal gyrus	SFG_R	YES	–	–	–	–	–	–	–	–	–	–	–	–	–	–	–	–	–	–	–	–	-0.0361	-0.1908	0.1209	0.65088	1.22694e-68	0.0429	NA	0.7445	0.801341	0.0380358	-0.9997	NA	1	1	0.984538	-0.1709	-0.4725	0.1621	0.319074	3.84759e-55	-0.0013	-0.1426	0.1403	0.987136	2.32767e-71	-0.2521
temporal cortex	Right superior temporal gyrus	STG_R	YES	–	–	–	–	–	–	–	–	–	–	–	–	–	–	–	–	–	–	–	–	-0.0415	-0.1929	0.1125	0.595179	3.91377e-64	-0.0887	-0.6168	-0.0887	0.620046	0.00844642	-1	NA	1	0.929396	0.929388	0.0299	-0.2715	0.3285	0.850093	8.52155e-46	0.0365	-0.1046	0.1764	0.61379	2.15282e-64	-0.4004
frontal cortex	Right frontal pole	FP_R	YES	–	–	–	–	–	–	–	–	–	–	–	–	–	–	–	–	–	–	–	–	-0.108	-0.2593	0.0487	0.175798	1.18286e-65	-0.2417	-1	1	0.270238	0.0926502	0.8976	-1	NA	0.977763	0.958545	-0.0092	-0.2909	0.276	0.887935	5.84017e-53	-0.114	-0.2491	0.0265	0.109006	6.84384e-72	0.0053
temporal cortex	Right temporal pole	TP_R	YES	–	–	–	–	–	–	–	–	–	–	–	–	–	–	–	–	–	–	–	–	0.0543	-0.1088	0.2184	0.485034	6.66377e-71	-0.0952	-1	1	0.733129	0.0862272	-0.9999	NA	1	0.621673	0.649504	0.3637	-0.0125	0.6355	0.0525875	8.61105e-32	0.0254	-0.1196	0.1735	0.599546	4.9577e-66	0.2668
temporal cortex	Right transverse temporal gyrus	TTG_R	YES	–	–	–	–	–	–	–	–	–	–	–	–	–	–	–	–	–	–	–	–	-0.0117	-0.1694	0.1442	1	1.50442e-63	-0.1673	-1	1	0.689086	0.0553255	0.9976	-1	NA	0.421967	1	0.0075	-0.3717	0.3606	1	1.09434e-40	0.1116	-0.0358	0.2505	0.136245	6.78876e-64	-0.289
insular cortex	Right insula	Ins_R	YES	–	–	–	–	–	–	–	–	–	–	–	–	–	–	–	–	–	–	–	–	-0.1219	-0.2644	0.03	0.112766	8.0014e-81	-0.138	-1	1	0.613659	0.14035	0.7894	-1	1	0.702218	0.953384	-0.1723	-0.4693	0.1651	0.312396	1.6715e-50	0.0571	-0.0849	0.1973	0.416816	9.76436e-65	-0.2597
white matter FA	Left anterior thalamic radiation	ATR_L	YES	–	–	–	–	–	–	–	–	–	–	–	–	–	–	–	–	–	–	–	–	0.1778	0.0236	0.3229	0.0239126	5.55172e-61	0.3829	0.3829	0.9094	0.0448704	0.0267655	0.1343	-1	1	0.973807	0.640712	-0.2721	-0.5641	0.1214	0.165537	4.21239e-67	0.1203	-0.0266	0.2617	0.121985	8.61937e-59	0.4624
white matter FA	Right anterior thalamic radiation	ATR_R	YES	–	–	–	–	–	–	–	–	–	–	–	–	–	–	–	–	–	–	–	–	0.1684	0.0117	0.317	0.0347775	7.09298e-55	0.4525	0.4525	1	0.0542826	0.230692	0.5621	-1	1	0.592773	0.462145	-0.3337	-0.6019	0.0192	0.0618767	1.96923e-62	0.1695	0.0244	0.3075	0.0216281	3.15597e-61	0.5611
white matter FA	Left corticospinal tract	CST_L	YES	–	–	–	–	–	–	–	–	–	–	–	–	–	–	–	–	–	–	–	–	0.1673	0.0108	0.3177	0.0365115	2.23132e-54	0.2964	0.2562	0.666	0.135394	0.000581057	0.9969	-1	NA	0.474901	0.421266	-0.2005	-0.5019	0.1718	0.282756	4.22081e-63	0.108	-0.0345	0.247	0.134882	7.08997e-67	0.2101
white matter FA	right corticospinal tract	CST_R	YES	–	–	–	–	–	–	–	–	–	–	–	–	–	–	–	–	–	–	–	–	0.1868	0.0196	0.3438	0.0280044	8.02904e-55	0.1922	0.0463	0.464	0.21934	0.000152424	1	-0.9097	NA	0.229494	1	-0.0335	-0.4124	0.3316	0.873898	9.85782e-33	0.0435	-0.1004	0.1859	0.550959	3.75822e-63	0.0433
white matter FA	Left cingulum (cingulate gyrus)	CGC_L	YES	–	–	–	–	–	–	–	–	–	–	–	–	–	–	–	–	–	–	–	–	0.1423	-0.008	0.2866	0.0619011	2.51071e-56	0.6564	0.6564	NA	0.124891	0.427625	0.403	-1	1	0.579581	0.260913	-0.2119	-0.4685	0.0941	0.168896	2.33092e-46	0.0278	-0.1192	0.1737	0.71018	9.79463e-65	0.7356
white matter FA	Right cingulum (cingulate gyrus)	CGC_R	YES	–	–	–	–	–	–	–	–	–	–	–	–	–	–	–	–	–	–	–	–	0.1361	-0.0173	0.2804	0.0800556	4.09063e-59	0.2479	0.1774	0.6978	0.234275	0.012309	1	-1	NA	0.669894	1	-0.0474	-0.3842	0.3222	0.805529	2.47908e-34	0.0565	-0.0877	0.1966	0.445653	4.81124e-65	-0.0082
white matter FA	Left cingulum (hippocampus)	CGH_L	YES	–	–	–	–	–	–	–	–	–	–	–	–	–	–	–	–	–	–	–	–	0.1153	-0.0469	0.2693	0.160111	1.01638e-56	0.1329	0.1329	0.8121	0.500042	0.029076	0.9925	-1	NA	0.800415	1	0.0688	-0.2705	0.3935	0.696673	7.10776e-43	0.0202	-0.1235	0.1631	0.781806	2.25148e-65	0.2816
white matter FA	Right cingulum (hippocampus)	CGH_R	YES	–	–	–	–	–	–	–	–	–	–	–	–	–	–	–	–	–	–	–	–	0.0392	-0.1157	0.1922	0.618734	3.10866e-61	0.1245	NA	0.9459	0.58611	0.0426055	0.7216	-1	NA	0.759038	0.717092	-0.0889	-0.3724	0.206	0.561581	4.83167e-51	0.0428	-0.0976	0.1811	0.548652	3.68087e-66	-0.1976
white matter FA	Forceps major	Fmajor	YES	–	–	–	–	–	–	–	–	–	–	–	–	–	–	–	–	–	–	–	–	0.048	-0.11	0.201	0.545701	9.60818e-60	0.3365	0.3002	1	0.259516	0.0999727	0.8505	-1	1	0.385467	0.624015	-0.3737	-0.6291	-0.0077	0.0444204	4.82203e-44	0.118	-0.0296	0.2583	0.117155	3.82322e-59	0.0417
white matter FA	Forceps minor	Fminor	YES	–	–	–	–	–	–	–	–	–	–	–	–	–	–	–	–	–	–	–	–	0.1441	-0.0161	0.2965	0.0760297	4.32627e-54	0.3457	-0.0657	1	0.102855	0.0566654	0.7995	-1	1	0.474402	0.612282	-0.3416	-0.6171	0.0261	0.066234	2.01179e-48	0.1445	0.0002	0.2818	0.0488902	6.26518e-59	0.6731
white matter FA	Left inferior fronto-occipital fasciculus	IFOF_L	YES	–	–	–	–	–	–	–	–	–	–	–	–	–	–	–	–	–	–	–	–	0.1617	0.0044	0.3103	0.0428845	5.60057e-55	0.3471	0.3471	0.9589	0.0893608	0.0369465	1	-1	NA	0.432206	1	-0.2089	-0.492	0.1295	0.219806	5.30874e-55	0.1222	-0.0219	0.2612	0.0948728	1.25056e-83	0.2951
white matter FA	Right inferior fronto-occipital fasciculus	IFOF_R	YES	–	–	–	–	–	–	–	–	–	–	–	–	–	–	–	–	–	–	–	–	0.0315	-0.1203	0.1813	0.682754	1.98691e-70	0.0199	-0.2947	0.3706	0.887698	0.000924456	-0.9924	NA	-0.9534	0.92785	0.927756	0.0652	-0.2743	0.389	0.713677	3.08559e-35	-0.0731	-0.2146	0.0719	0.319797	4.56699e-71	-0.2076
white matter FA	Left inferior longitudinal fasciculus	ILF_L	YES	–	–	–	–	–	–	–	–	–	–	–	–	–	–	–	–	–	–	–	–	0.0536	-0.1063	0.2086	0.507842	5.55377e-64	0.23	-0.1804	0.3779	0.204015	0.0623857	-1	NA	1	0.727593	0.519327	-0.2124	-0.5195	0.1165	0.239711	5.30847e-65	0.0499	-0.0945	0.1919	0.49623	1.1765e-64	0.2156
white matter FA	Right inferior longitudinal fasciculus	ILF_R	YES	–	–	–	–	–	–	–	–	–	–	–	–	–	–	–	–	–	–	–	–	0.0693	-0.0899	0.2243	0.390742	3.77947e-67	0.2999	0.2999	0.9628	0.161579	0.0286809	-0.2592	NA	NA	0.896897	0.40575	-0.2826	-0.5787	0.0903	0.132884	7.77776e-68	0.0767	-0.0669	0.2182	0.304744	1.08669e-63	-0.0499
white matter FA	Left superior longitudinal fasciculus	SLF_L	YES	–	–	–	–	–	–	–	–	–	–	–	–	–	–	–	–	–	–	–	–	0.1034	-0.0588	0.2624	0.20973	4.8175e-62	0.1929	0.0704	0.5832	0.235644	0.00226192	-0.8138	NA	1	0.892708	0.701182	-0.1187	-0.5007	0.3037	0.594947	6.91721e-43	0.0702	-0.077	0.2146	0.355604	9.26324e-61	0.0068
white matter FA	Right superior longitudinal fasciculus	SLF_R	YES	–	–	–	–	–	–	–	–	–	–	–	–	–	–	–	–	–	–	–	–	0.1658	0.0023	0.3206	0.0457343	1.41745e-53	0.3029	0.3029	0.7791	0.0714966	0.0151538	0.9417	-1	NA	0.441429	0.820146	-0.3677	-0.6581	NA	0.0723802	6.45086e-42	0.0762	-0.0685	0.2194	0.300754	6.87717e-63	0.1812
white matter FA	Left uncinate fasciculus	UNC_L	YES	–	–	–	–	–	–	–	–	–	–	–	–	–	–	–	–	–	–	–	–	0.1085	-0.0503	0.2613	0.177497	2.73912e-59	0.0659	-0.2311	0.2933	0.620158	0.000163399	-1	NA	1	0.955207	0.464879	0.2451	-0.1682	0.5802	0.245956	7.06008e-49	0.113	-0.0301	0.2519	0.11599	1.71304e-64	0.3441
white matter FA	Right uncinate fasciculus	UNC_R	YES	–	–	–	–	–	–	–	–	–	–	–	–	–	–	–	–	–	–	–	–	0.0385	-0.1247	0.1983	0.641646	2.39878e-63	0.1288	0.1288	0.7562	0.476264	0.0342121	-1	NA	1	0.881451	0.88115	-0.1066	-0.4426	0.2531	0.566988	8.64363e-42	0.1073	-0.0357	0.2464	0.139276	4.56263e-62	0.3688
white matter FA	Left superior longitudinal fasciculus (temporal part)	SLFtemp_L	YES	–	–	–	–	–	–	–	–	–	–	–	–	–	–	–	–	–	–	–	–	-0.0001	-0.1441	0.1446	0.99741	1.92784e-67	-0.0048	-1	1	0.997249	0.644942	1	-1	NA	0.825126	0.01973	-0.0195	-0.2731	0.111	0.883617	7.68309e-71	0.0472	-0.0893	0.1832	0.513138	3.30602e-67	0.1016
white matter FA	Right superior longitudinal fasciculus (temporal part)	SLFtemp_R	YES	–	–	–	–	–	–	–	–	–	–	–	–	–	–	–	–	–	–	–	–	0.0047	-0.1414	0.1504	0.950066	6.49583e-70	-0.3186	-1	NA	0.354058	0.128529	-1	NA	1	0.979292	0.979223	0.268	-0.0658	0.5398	0.112461	6.18065e-58	-0.0122	-0.1511	0.1276	0.864318	1.02187e-67	0.0185
white matter MD	Left anterior thalamic radiation	ATR_L	YES	–	–	–	–	–	–	–	–	–	–	–	–	–	–	–	–	–	–	–	–	-0.1477	-0.2985	0.0096	0.0644268	1.04834e-66	-0.0826	-0.404	0.3048	0.615134	0.00453109	-1	NA	1	0.521148	0.407456	-0.2234	-0.5111	0.1101	0.187005	3.45284e-70	-0.141	-0.2844	0.0075	0.0624116	1.17793e-69	-0.3004
white matter MD	Right anterior thalamic radiation	ATR_R	YES	–	–	–	–	–	–	–	–	–	–	–	–	–	–	–	–	–	–	–	–	-0.1918	-0.3369	-0.0371	0.0152081	5.40036e-69	-0.2691	-0.8768	-0.2691	0.100984	0.00630149	-0.9999	NA	1	0.543173	0.476405	0.0005	-0.3302	0.3284	1	2.10566e-50	-0.202	-0.3395	-0.0557	0.00705918	9.49332e-72	-0.6737
white matter MD	Left corticospinal tract	CST_L	YES	–	–	–	–	–	–	–	–	–	–	–	–	–	–	–	–	–	–	–	–	-0.0978	-0.1494	0.0626	0.252987	3.83704e-64	-0.117	-0.6869	-0.117	0.572891	0.00335394	-1	NA	1	0.142115	0.0676538	0.2067	-0.1746	0.5268	0.290778	9.89743e-41	-0.1619	-0.3003	-0.0159	0.0292984	1.14399e-70	-0.4775
white matter MD	right corticospinal tract	CST_R	YES	–	–	–	–	–	–	–	–	–	–	–	–	–	–	–	–	–	–	–	–	-0.1642	-0.3184	0.0003	0.111038	4.34924e-66	-0.3126	-0.8839	-0.3126	0.141456	0.00277095	-1	NA	1	0.451418	0.0144233	0.1526	-0.1608	0.4535	0.390995	1.82393e-37	-0.1353	-0.2776	0.0126	0.0725914	5.48598e-70	-0.4123
white matter MD	Left cingulum (cingulate gyrus)	CGC_L	YES	–	–	–	–	–	–	–	–	–	–	–	–	–	–	–	–	–	–	–	–	-0.0986	-0.2574	0.0663	0.237921	6.68574e-66	-0.1399	-1	NA	0.537112	0.0167361	-0.0853	-1	1	0.942214	0.426727	-0.0584	-0.4016	0.3232	0.771044	1.03517e-32	-0.0836	-0.231	0.068	0.275878	2.91615e-65	-0.2523
white matter MD	Right cingulum (cingulate gyrus)	CGC_R	YES	–	–	–	–	–	–	–	–	–	–	–	–	–	–	–	–	–	–	–	–	-0.0533	-0.2153	0.113	0.527545	2.69558e-63	-0.027	-0.2394	0.3026	0.841137	0.000447662	1	-1	NA	0.669267	1	-0.2049	-0.5359	0.2075	0.3233	2.69755e-49	-0.1632	-0.3018	-0.019	0.0266946	3.89575e-75	-0.544
white matter MD	Left cingulum (hippocampus)	CGH_L	YES	–	–	–	–	–	–	–	–	–	–	–	–	–	–	–	–	–	–	–	–	-0.138	-0.2913	0.0249	0.0950911	3.23415e-66	-0.2858	-0.8331	NA	0.071219	0.00211547	-1	NA	1	0.979905	0.978209	0.1822	-0.1691	0.4863	0.305021	5.27643e-45	-0.1431	-0.2828	0.0036	0.0545185	3.57144e-71	-0.1822
white matter MD	Right cingulum (hippocampus)	CGH_R	YES	–	–	–	–	–	–	–	–	–	–	–	–	–	–	–	–	–	–	–	–	-0.0751	-0.2356	0.0915	0.373416	9.48924e-72	-0.1704	-0.7637	-0.1704	0.325679	0.00330105	1	-1	NA	0.700793	0.983113	0.0898	-0.3039	0.4522	0.661063	8.14877e-34	-0.1791	-0.319	-0.0322	0.0182252	1.88435e-89	-0.7804
white matter MD	Forceps major	Fmajor	YES	–	–	–	–	–	–	–	–	–	–	–	–	–	–	–	–	–	–	–	–	-0.2347	-0.3757	-0.0816	0.00316205	2.64311e-77	-0.5016	-1	-0.5016	0.0306941	0.01017	0.0261	-1	1	0.994345	0.00617721	-0.0041	-0.3099	0.2965	0.985598	6.83025e-73	-0.2045	-0.3358	-0.0687	0.00348994	4.06008e-77	-0.2762
white matter MD	Forceps minor	Fminor	YES	–	–	–	–	–	–	–	–	–	–	–	–	–	–	–	–	–	–	–	–	-0.1907	-0.3389	-0.0327	0.0183561	9.16202e-74	-0.4124	-1	-0.4124	0.00997515	0.000377502	-0.4475	-0.4475	1	0.786599	0.00760118	0.391	0.01	0.6615	0.0446844	1.52774e-20	-0.1866	-0.3259	-0.0395	0.0133252	4.44602e-72	-0.5216
white matter MD	Left inferior fronto-occipital fasciculus	IFOF_L	YES	–	–	–	–	–	–	–	–	–	–	–	–	–	–	–	–	–	–	–	–	-0.1229	-0.2798	0.0413	0.139474	1.76033e-64	-0.1791	-0.4202	0.0371	0.143282	3.21315e-05	-1	NA	1	0.493272	0.428399	0.1842	-0.2021	0.516	0.349366	7.77671e-31	-0.1281	-0.2739	0.0227	0.100833	4.39322e-68	-0.3251
white matter MD	Right inferior fronto-occipital fasciculus	IFOF_R	YES	–	–	–	–	–	–	–	–	–	–	–	–	–	–	–	–	–	–	–	–	-0.18	-0.3248	-0.0245	0.0229504	2.8752e-68	-0.4945	NA	-0.4945	0.00797595	0.000630694	-1	NA	1	0.693328	0.690947	0.3534	-0.0177	0.6255	0.063403	8.9015e-37	-0.1985	-0.3354	-0.0527	0.00799997	1.20119e-70	-0.5812
white matter MD	Left inferior longitudinal fasciculus	ILF_L	YES	–	–	–	–	–	–	–	–	–	–	–	–	–	–	–	–	–	–	–	–	-0.1012	-0.2582	0.0569	0.220906	1.84616e-63	-0.1794	-0.503	-0.1794	0.173128	0.000830536	-0.9988	NA	1	0.830003	5.31267e-176	0.1433	-0.2091	0.4624	0.434631	3.89053e-53	-0.1635	-0.3057	-0.0149	0.0296668	2.98001e-80	-0.4316
white matter MD	Right inferior longitudinal fasciculus	ILF_R	YES	–	–	–	–	–	–	–	–	–	–	–	–	–	–	–	–	–	–	–	–	-0.0828	-0.2385	0.0785	0.310527	7.82646e-66	-0.2064	-0.6537	-0.191	0.236254	0.00129092	-1	NA	1	0.87592	0.874914	0.1566	-0.2336	0.4909	0.431225	2.24747e-35	-0.2138	-0.3494	-0.0692	0.0038459	5.60942e-80	-0.634
white matter MD	Left superior longitudinal fasciculus	SLF_L	YES	–	–	–	–	–	–	–	–	–	–	–	–	–	–	–	–	–	–	–	–	-0.0989	-0.2551	0.0616	0.223599	4.85687e-66	-0.1533	-0.4574	-0.1533	0.278207	0.00142924	0.8834	-1	NA	0.928129	0.774199	0.0647	-0.2939	0.4066	0.726892	2.40969e-66	-0.1362	-0.2796	0.0119	0.0701449	6.90097e-70	-0.5933
white matter MD	Right superior longitudinal fasciculus	SLF_R	YES	–	–	–	–	–	–	–	–	–	–	–	–	–	–	–	–	–	–	–	–	-0.1881	-0.3392	-0.0277	0.0211694	1.64769e-80	-0.3165	-0.6638	-0.1951	0.022887	2.93979e-05	-0.5695	-1	1	0.784145	0.781005	0.2732	-0.1134	0.5772	0.160828	2.2726e-23	-0.1247	-0.2695	0.0247	0.0766349	1.4797e-67	-0.4412
white matter MD	Left uncinate fasciculus	UNC_L	YES	–	–	–	–	–	–	–	–	–	–	–	–	–	–	–	–	–	–	–	–	-0.1624	-0.3153	-0.0008	0.0480948	4.69242e-70	-0.1624	-0.6025	-0.1268	0.421692	0.0284629	-0.5183	-1	1	0.797157	0.570928	-0.1552	-0.4954	0.2192	0.422858	1.52857e-40	-0.0269	-0.1771	0.1234	0.726316	1.1565e-66	-0.163
white matter MD	Right uncinate fasciculus	UNC_R	YES	–	–	–	–	–	–	–	–	–	–	–	–	–	–	–	–	–	–	–	–	-0.0514	-0.205	0.1063	0.519401	3.65222e-67	-0.3156	-0.8048	-0.3156	0.0555213	0.000236409	1	-1	NA	0.835869	0.776046	0.4382	0.0965	0.6741	0.0134644	2.78534e-43	-0.0919	-0.231	0.0529	0.208777	3.65854e-67	-0.2413
white matter MD	Left superior longitudinal fasciculus (temporal part)	SLFtemp_L	YES	–	–	–	–	–	–	–	–	–	–	–	–	–	–	–	–	–	–	–	–	-0.0343	-0.1979	0.1325	0.687854	1.30704e-59	-0.1347	-1	1	0.844496	0.520919	0.7057	-1	1	0.881397	0.887291	-0.0451	-0.4091	0.3391	0.82856	1.16483e-38	-0.1453	-0.2853	-0.0009	0.0477781	2.28917e-71	-0.7304
white matter MD	Right superior longitudinal fasciculus (temporal part)	SLFtemp_R	YES	–	–	–	–	–	–	–	–	–	–	–	–	–	–	–	–	–	–	–	–	-0.1055	-0.2625	0.0607	0.210673	7.23039e-73	-0.0541	-0.4994	0.5908	0.785127	0.0291519	-1	NA	1	0.785951	0.67534	-0.194	-0.5343	0.1966	0.333292	1.68829e-51	-0.1436	-0.2876	0.0056	0.0622733	1.0647e-79	-0.6355
[truncated: 38 more columns]

## Sheet: Associations changes CBCL
				Assessment #1 to #2: 10 to 13 years																				Assessment #2 to #3: 13 to 18 years																				Assessment #1 to #3: 10 to 18 years
Brain measure				Phenotypic association					Genetic association					Common environment association					Unique environment association					Phenotypic association					Genetic association					Common environment association					Unique environment association					Phenotypic association					Genetic association
atlas	region	abbreviation	correct global brain	estimate	lower CI	upper CI	p-value (0)	p-value (1)	estimate	lower CI	upper CI	p-value (0)	p-value (1)	estimate	lower CI	upper CI	p-value (0)	p-value (1)	estimate	lower CI	upper CI	p-value (0)	p-value (1)	estimate	lower CI	upper CI	p-value (0)	p-value (1)	estimate	lower CI	upper CI	p-value (0)	p-value (1)	estimate	lower CI	upper CI	p-value (0)	p-value (1)	estimate	lower CI	upper CI	p-value (0)	p-value (1)	estimate	lower CI	upper CI	p-value (0)	p-value (1)	estimate
global	Total brain volume	TBV	NO	0.0366	-0.1548	0.2221	0.705757	NA	0.1326	-0.0029	0.7535	0.583299	NA	0.994	-1	NA	0.661332	NA	-0.1373	-0.5021	0.27	0.509588	NA	0.1031	-0.0907	0.2874	0.293695	NA	0.371	-0.2316	0.9	0.198032	NA	-0.9984	NA	1	0.263035	NA	0.0284	-0.328	0.3979	0.883897	NA	0.0667	-0.1043	0.2308	0.442491	NA	0.197
global	Global white matter mean fractional anisotropy	GFA	NO	0.0469	NA	NA	0.635039	NA	-0.0883	NA	1	0.862267	NA	-0.8376	NA	NA	0.581681	NA	0.2313	-0.1513	NA	0.233691	NA	-0.0664	-0.2525	0.124	0.501845	NA	0.013	NA	0.919	0.984077	NA	-0.8698	-1	1	0.326638	NA	0.0621	-0.2552	0.3019	0.709094	NA	-0.0008	NA	NA	0.992263	NA	-0.5887
global	Global white matter mean diffusivity	GMD	NO	-0.1385	-0.3217	0.0593	0.166469	NA	-0.5334	-0.9942	NA	0.113873	NA	0.3916	-1	1	0.688696	NA	-0.0056	-0.3585	0.3491	0.97673	NA	0.0906	-0.0925	0.2685	0.331168	NA	0.1644	-1	1	0.8672	NA	0.8766	-1	1	0.311914	NA	-0.1012	-0.3863	0.2111	0.529282	NA	0.0062	-0.1709	0.1837	0.945224	NA	0.1838
global	Total cortical gray matter volume	CGM	YES	-0.0254	-0.2046	0.158	0.785071	NA	-0.1212	-1	NA	0.792131	NA	-0.7053	-1	1	0.647379	NA	0.0818	-0.3034	0.4461	0.613643	NA	-0.0609	-0.2152	0.1322	0.519267	NA	0.2284	-0.4932	0.9282	0.613497	NA	-0.9951	-1	1	0.122538	NA	-0.0885	-0.395	0.2195	0.537948	NA	0.0502	-0.1014	0.1981	0.503321	NA	-0.4457
global	Total subcortical gray matter volume	SGM	YES	-0.0318	-0.2163	0.157	0.594024	NA	-0.5792	-1	1	0.300917	NA	0.6046	-1	1	0.620345	NA	0.2439	-0.1567	0.565	0.210729	NA	0.0118	-0.1771	0.2	0.713978	NA	-0.2221	-0.9961	0.9066	0.416667	NA	0.8274	-1	NA	0.872233	NA	0.2925	-0.049	0.5566	0.0849444	NA	-0.0539	-0.2043	0.0993	0.358015	NA	-0.264
global	Total cortical white matter volume	WMV	YES	-0.1054	-0.2803	0.0774	0.254277	NA	-0.5565	-1	1	0.323074	NA	0.557	-1	NA	0.717107	NA	0.0137	-0.3925	0.3786	0.862739	NA	0.1001	-0.0921	0.2821	0.302473	NA	0.0355	-0.6114	0.8347	0.735069	NA	0.9684	-1	NA	0.261735	NA	0.0606	-0.2781	0.3873	0.710809	NA	-0.1169	-0.2684	0.0447	0.143019	NA	-0.1911
subcortical	Left putamen	PUT_L	YES	-0.1304	-0.2981	0.0464	0.135821	NA	-0.678	-0.9991	-0.2423	0.0900633	NA	-0.5347	-1	1	0.745335	NA	0.1631	-0.2513	0.4856	0.379466	NA	-0.1089	-0.28	0.0701	0.210265	NA	-0.6349	-1	-0.6349	0.0385612	NA	-0.7692	NA	1	0.702089	NA	0.3689	0.0191	0.6326	0.0335944	NA	0.0509	-0.1009	0.2005	0.74713	NA	0.3256
subcortical	Left hippocampus	HIP_L	YES	0.0516	-0.1288	0.2272	0.56557	NA	-0.018	-0.9385	0.2343	0.841056	NA	0.9996	-1	NA	0.486744	NA	0.1273	-0.2972	0.5247	0.553214	NA	0.0599	-0.1116	0.2278	0.481312	NA	0.3433	-1	1	0.439654	NA	0.4078	NA	1	0.84609	NA	-0.0696	-0.3673	0.238	0.649871	NA	0.1458	-0.0158	0.2972	0.0718074	NA	0.0573
subcortical	Left amygdala	AMY_L	YES	-0.0076	-0.1837	0.1701	0.93279	NA	0.2226	-0.9627	1	0.748597	NA	-0.9161	NA	1	0.692279	NA	-0.0674	-0.3505	NA	0.657914	NA	-0.1133	-0.2894	0.0721	0.226877	NA	-0.3058	NA	1	0.513304	NA	0.5194	-1	NA	0.901553	NA	-0.1213	-0.4225	0.1988	0.464489	NA	-0.0075	-0.1644	0.1497	0.9259	NA	0.4575
subcortical	Right putamen	PUT_R	YES	0.0241	-0.1653	0.2122	0.710614	NA	0.3452	-1	1	0.519537	NA	-0.9421	NA	1	0.46386	NA	-0.0766	-0.4341	0.3122	0.627313	NA	0.0326	-0.1449	0.2083	0.674133	NA	0.3067	-1	1	0.583889	NA	-0.9739	-1	1	0.389681	NA	0.0325	-0.2876	0.3517	0.74555	NA	-0.0485	-0.2058	0.1124	0.50873	NA	0.2155
subcortical	Right hippocampus	HIP_R	YES	0.0034	-0.1868	0.1915	0.965574	NA	-0.3663	-0.8828	NA	0.308601	NA	0.9683	-1	NA	0.354243	NA	0.3091	-0.1005	0.6171	0.137046	NA	0.0034	-0.1795	0.1852	0.969905	NA	-0.2565	-1	1	0.899184	NA	0.4293	-1	NA	0.701191	NA	-0.0047	-0.2992	0.2886	0.875424	NA	0.0916	-0.0694	0.246	0.259641	NA	0.2838
subcortical	Right amygdala	AMY_R	YES	-0.0787	-0.2561	0.1032	0.396435	NA	0.0283	-1	1	0.946526	NA	0.777	-1	NA	0.81675	NA	-0.2747	-0.5661	0.1497	0.190024	NA	0.0284	-0.152	0.2087	0.759964	NA	0.3318	-1	1	0.507272	NA	-0.9628	-1	1	0.658122	NA	-0.0804	-0.3679	0.2158	0.600774	NA	-0.0858	-0.2418	0.0735	0.29007	NA	0.124
temporal cortex	Left banks of superior temporal gyrus	Bank_L	YES	0.153	-0.0301	0.3246	0.251526	NA	0.6199	-1	NA	0.361401	NA	1	-1	NA	0.608756	NA	0.107	-0.1923	0.4014	0.481537	NA	0.0425	-0.1474	0.2279	0.729838	NA	0.4373	-1	1	0.512425	NA	-1	NA	1	0.804272	NA	-0.0657	-0.3835	0.2587	0.700281	NA	0.0043	-0.1484	0.1591	0.956315	NA	0.5068
anterior cingulum	Left caudal anterior cingulate cortex	ACc_L	YES	0.0906	-0.0926	0.2653	0.327038	NA	0.6091	NA	NA	0.135687	NA	-0.9996	NA	1	0.952696	NA	-0.3248	-0.6478	0.1629	0.185609	NA	0.0368	-0.1546	0.2251	0.706908	NA	0.2498	-0.0276	0.8479	0.330323	NA	0.9998	-1	NA	0.951273	NA	-0.2279	-0.5366	0.1481	0.231434	NA	0.0167	-0.1367	0.1697	0.830935	NA	0.328
frontal cortex	Left caudal middle frontal gyrus	cMFG_L	YES	-0.0702	-0.2424	0.1078	0.436365	NA	-0.2568	-0.997	-0.0089	0.417767	NA	-0.0092	-1	1	0.49517	NA	0.1111	-0.3254	0.4766	0.622087	NA	-0.0551	-0.2332	0.1282	0.553063	NA	-0.3639	-0.9933	0.2156	0.403226	NA	0.598	-1	1	0.854391	NA	0.0753	-0.2463	0.3895	0.490547	NA	-0.0364	-0.1914	0.1198	0.523928	NA	-0.0932
temporal cortex	Left entorhinal gyrus	Ent_L	YES	0.0792	-0.0955	0.2493	0.392532	NA	0.7731	-1	NA	0.235067	NA	-0.9961	NA	1	0.473534	NA	-0.0733	-0.386	0.2309	0.649397	NA	-0.0113	-0.1937	0.1722	0.911469	NA	-0.3744	-1	1	0.548157	NA	0.9582	NA	NA	0.440842	NA	0.0834	-0.2042	0.3672	0.577525	NA	0.1347	-0.0241	0.2854	0.0982294	NA	0.3086
temporal cortex	Left fusiform gyrus	FG_L	YES	-0.0877	-0.2723	NA	0.375009	NA	-0.3472	NA	0.9998	0.619568	NA	-0.8781	-1	1	0.521584	NA	0.0341	-0.4053	0.4701	0.892156	NA	0.0493	-0.142	0.2399	0.615673	NA	0.703	-1	NA	0.225494	NA	-0.9242	-1	1	0.418277	NA	-0.2122	-0.5561	0.2047	0.318142	NA	0.0827	-0.0695	0.2325	0.285419	NA	-0.1363
temporal cortex	Left inferior temporal gyrus	ITG_L	YES	0.1	-0.0882	0.2802	0.293615	NA	0.4955	-1	1	0.228424	NA	-0.6513	NA	1	0.703986	NA	-0.098	-0.4753	0.2675	0.615645	NA	0.0807	-0.1138	0.2676	0.41306	NA	0.6379	NA	1	0.177657	NA	-0.9111	NA	1	0.362373	NA	-0.0551	-0.3812	0.2773	0.761941	NA	0.0619	-0.0955	0.2154	0.437153	NA	0.3586
frontal cortex	Left lateral orbitofrontal gyrus	lOFG_L	YES	-0.0672	-0.2412	0.1117	0.390844	NA	-0.0683	-1	1	0.680574	NA	0.0445	-1	1	0.706658	NA	-0.1441	-0.4738	0.2233	0.445144	NA	0.0345	-0.1495	0.2159	0.65959	NA	0.6414	-1	1	0.235787	NA	-0.4694	-1	1	0.613642	NA	-0.1901	-0.4466	0.1007	0.15453	NA	0.1517	-0.0014	0.2975	0.113921	NA	0.5591
frontal cortex	Left medial orbitofrontal gyrus	mOFG_L	YES	0.1626	-0.0157	0.3329	0.0345903	NA	0.6519	-1	1	0.354013	NA	-0.7155	NA	1	0.621354	NA	0.1818	-0.2133	0.5269	0.37344	NA	0.0511	-0.1301	0.2312	0.484369	NA	0.6303	-1	1	0.612201	NA	-0.5224	NA	1	0.194361	NA	0.011	-0.2692	0.2833	0.758961	NA	0.149	-0.0055	0.2956	0.0529667	NA	0.1686
temporal cortex	Left middle temporal gyrus	MTG_L	YES	0.1814	-0.0223	NA	0.0792007	NA	0.2095	0.2095	0.7347	0.328774	NA	-1	NA	1	0.951251	NA	0.195	-0.2296	0.5597	0.376282	NA	-0.1038	-0.292	0.0927	0.299512	NA	-0.5551	-1	-0.5551	0.151486	NA	-1	NA	1	0.552991	NA	0.3051	-0.0213	NA	0.0654135	NA	0.0771	-0.0944	0.2416	0.374394	NA	0.1283
temporal cortex	Left parahippocampal gyrus	Par_L	YES	0.0562	-0.1289	0.2356	0.548485	NA	0.081	-1	1	0.899139	NA	0.1523	NA	1	0.969878	NA	0.1069	-0.3093	0.4302	0.596721	NA	0.0599	-0.1277	0.2444	0.531497	NA	0.1595	-0.5222	0.7762	0.568098	NA	-0.3853	-1	1	0.853788	NA	-0.0053	-0.3453	0.3303	0.983094	NA	0.0019	-0.1522	0.1578	0.988725	NA	0.4926
frontal cortex	Left pars opercularis	Opr_L	YES	0.0354	-0.1526	0.2217	0.710876	NA	0.1702	-0.7002	0.9519	0.712201	NA	-0.9416	NA	1	0.529359	NA	0.0527	-0.2487	0.3466	0.675965	NA	0.1254	-0.0627	0.3034	0.187375	NA	0.476	-1	1	0.363644	NA	-0.9443	NA	1	0.519984	NA	0.1505	-0.1718	0.4356	0.50101	NA	0.023	-0.1291	0.174	0.768005	NA	-0.2499
frontal cortex	Left pars orbitalis	Orb_L	YES	0.0642	-0.1114	0.236	0.474216	NA	0.748	-1	NA	0.278028	NA	-0.709	NA	1	0.961534	NA	-0.1419	-0.4668	0.2264	0.45836	NA	0.106	-0.0728	0.2784	0.242886	NA	0.6198	NA	1	0.107603	NA	-0.986	NA	1	0.73181	NA	-0.1872	-0.4924	0.1613	0.29317	NA	0.1765	0.0219	0.3236	0.0252587	NA	0.7779
frontal cortex	Left pars triangularis	Tri_L	YES	-0.0414	-0.218	0.1405	0.876532	NA	-0.0197	-1	1	0.977319	NA	-0.9897	NA	1	0.650681	NA	-0.0412	-0.4433	0.3304	0.843715	NA	0.0207	-0.1664	0.2077	0.829311	NA	0.0975	-1	1	0.857108	NA	-0.982	-1	1	0.421745	NA	0.1107	-0.2746	0.4621	0.541173	NA	0.1651	0.0181	0.3053	0.0257724	NA	0.9599
anterior cingulum	Left rostral anterior cingulate gyrus	ACr_L	YES	-0.0408	-0.2228	0.145	0.769456	NA	-0.0749	-1	0.6203	0.847115	NA	-0.2439	NA	NA	0.947548	NA	-0.0447	-0.3879	0.3284	0.820965	NA	-0.0642	-0.2459	0.1267	0.504966	NA	-0.7355	NA	1	0.360756	NA	-0.5717	-1	1	0.605589	NA	0.1311	-0.1564	0.3946	0.506728	NA	0.1361	-0.0172	0.2827	0.0794449	NA	0.6453
frontal cortex	Left rostral middle frontal gyrus	rMFG_L	YES	-0.0488	-0.2274	0.1336	0.600829	NA	-0.1107	NA	NA	0.704459	NA	-1	NA	1	0.866701	NA	-0.0061	-0.3725	0.3666	0.975625	NA	0.005	-0.178	0.1872	0.957779	NA	-0.2838	-1	1	0.68539	NA	-1	NA	1	0.754047	NA	0.1415	-0.0138	0.4411	0.387301	NA	0.0807	-0.077	0.2319	0.311404	NA	-0.0297
frontal cortex	Left superior frontal gyrus	SFG_L	YES	-0.02	-0.1996	0.1643	0.830657	NA	-0.1377	-1	1	0.795301	NA	-0.9722	NA	1	0.702978	NA	0.0834	-0.2784	0.422	0.658485	NA	-0.2229	-0.3945	-0.0309	0.0241794	NA	-0.3701	-0.9998	NA	0.47377	NA	-0.8873	-1	1	0.502467	NA	-0.2351	-0.5706	0.1475	0.234489	NA	0.0428	-0.1077	0.1936	0.576203	NA	0.0779
temporal cortex	Left superior temporal gyrus	STG_L	YES	0.1052	-0.0864	0.2825	0.275781	NA	0.2319	0.2319	0.9967	0.33349	NA	0.7558	NA	1	0.773823	NA	-0.1179	-0.4731	0.2866	0.570755	NA	0.0832	-0.107	0.2663	0.388054	NA	0.3253	-1	1	0.599561	NA	-0.9368	NA	1	0.388427	NA	0.2176	-0.1004	0.5019	0.179087	NA	0.1345	-0.0299	0.2883	0.105824	NA	0.2112
frontal cortex	Left frontal pole	FP_L	YES	0.0196	-0.1519	0.1889	0.773172	NA	0.2531	-1	1	0.57872	NA	-0.9947	NA	NA	0.750617	NA	-0.0376	-0.3355	0.2887	0.661102	NA	0.0502	-0.1358	0.2316	0.513807	NA	0.0968	0.0968	0.8836	0.473084	NA	-1	NA	1	0.573667	NA	0.0886	-0.2475	0.4083	0.555062	NA	-0.0358	-0.1896	0.1195	0.593015	NA	-0.0099
temporal cortex	Left temporal pole	TP_L	YES	0.0306	-0.1457	0.2058	0.734584	NA	0.0908	-0.2814	0.659	0.658624	NA	-0.8874	NA	1	0.360846	NA	-0.0345	-0.3937	0.351	0.864429	NA	0.1317	-0.0617	0.3113	0.177563	NA	0.6333	0.6333	1	0.126413	NA	-0.0003	NA	1	1	NA	-0.18	-0.4501	0.1467	0.27002	NA	0.0385	-0.1197	0.1941	0.354006	NA	-0.001
temporal cortex	Left transverse temporal gyrus	TTG_L	YES	-0.0329	-0.2218	0.1593	0.738291	NA	-0.4091	-1	1	0.521102	NA	-0.7691	NA	1	0.862367	NA	0.158	-0.3561	0.5243	0.527789	NA	-0.0112	-0.1959	0.1762	0.907536	NA	0.1444	-0.6475	0.837	0.687271	NA	-0.9871	NA	1	0.515117	NA	-0.0884	-0.383	0.2438	0.598617	NA	0.0389	-0.1129	0.1905	0.616252	NA	0.0741
insular cortex	Left insula	Ins_L	YES	-0.0128	-0.1914	0.1677	0.889415	NA	-0.4413	-1	1	0.54214	NA	-0.9425	NA	1	0.56251	NA	0.174	-0.197	0.5268	0.46731	NA	-0.1251	-0.2937	0.0533	0.253103	NA	-0.5401	-1	-0.4792	0.243706	NA	0.5189	-1	1	0.822545	NA	0.0272	-0.3193	0.3773	0.26875	NA	0.0056	-0.1526	0.1628	0.945037	NA	0.6441
temporal cortex	Right banks of superior temporal gyrus	Bank_R	YES	-0.0962	-0.2754	0.0886	0.232857	NA	-0.1593	-1	1	0.659808	NA	0.6604	-1	1	0.300864	NA	-0.163	-0.5423	0.2863	0.315695	NA	0.0854	-0.1017	0.2667	0.338679	NA	0.5627	-0.9939	NA	0.223269	NA	0.7272	-1	1	0.723262	NA	-0.1579	-0.48	0.2045	0.270355	NA	-0.0879	-0.2423	0.0721	0.192168	NA	-0.2522
anterior cingulum	Right caudal anterior cingulate cortex	ACc_R	YES	-0.0115	-0.1957	0.1699	1	NA	0.2025	-1	1	0.60522	NA	-0.3296	-1	NA	0.889384	NA	-0.2211	-0.5521	0.2045	0.298965	NA	0.0843	-0.1075	0.2677	0.374374	NA	0.5179	NA	1	0.0752636	NA	-0.9861	NA	1	0.572623	NA	-0.279	-0.5511	0.0572	0.0996347	NA	-0.0567	-0.2158	0.104	0.409996	NA	-0.0703
frontal cortex	Right caudal middle frontal gyrus	cMFG_R	YES	-0.0625	-0.2343	0.1135	0.801738	NA	0.1184	-0.8714	0.918	0.779811	NA	0.9501	-1	NA	0.906528	NA	-0.2574	-0.5494	0.1073	0.215817	NA	0.0725	-0.1094	0.249	0.428247	NA	0.6192	-1	1	0.181631	NA	-0.7126	NA	NA	1	NA	-0.1536	-0.4214	0.1249	0.28092	NA	0.0116	-0.1381	0.1599	0.807007	NA	-0.0459
temporal cortex	Right entorhinal gyrus	Ent_R	YES	-0.1492	-0.3204	0.0335	0.0999571	NA	-0.8948	NA	1	0.262744	NA	-0.9873	NA	1	0.577972	NA	0.0211	-0.3995	0.3995	1	NA	-0.1137	-0.2878	0.0668	0.216294	NA	-0.4709	-1	1	0.460052	NA	-0.4957	-1	NA	1	NA	-0.0658	-0.3563	0.2386	0.733735	NA	0.0187	-0.1367	0.1703	0.935939	NA	-0.6309
temporal cortex	Right fusiform gyrus	FG_R	YES	0.0609	-0.1134	0.2339	0.494276	NA	0.6415	-1	NA	0.320094	NA	-0.8313	-1	NA	0.811272	NA	-0.1187	-0.4285	0.2519	0.52124	NA	-0.0594	-0.2499	0.1354	0.549253	NA	-0.2103	-1	0.8755	0.748964	NA	-0.5053	NA	NA	0.803483	NA	0.0012	-0.2835	0.2838	0.99368	NA	0.0673	-0.082	0.2145	0.375164	NA	0.7748
temporal cortex	Right inferior temporal gyrus	ITG_R	YES	0.013	-0.1664	0.1935	0.8879	NA	-0.0092	-1	1	0.978305	NA	-0.1455	NA	NA	0.972915	NA	0.0517	-0.385	0.4458	0.820464	NA	-0.0184	-0.2033	0.1677	0.847269	NA	0.4622	-0.8625	1	0.541386	NA	0.3751	-1	NA	0.802509	NA	-0.2469	-0.5088	0.0609	0.112918	NA	0.0974	-0.0575	0.2496	0.215581	NA	0.4486
frontal cortex	Right lateral orbitofrontal gyrus	lOFG_R	YES	-0.0385	-0.2148	0.1387	0.594134	NA	0.1623	-1	1	0.622452	NA	-0.4793	-1	1	0.656256	NA	-0.1898	-0.5167	0.1893	0.326341	NA	-0.0992	-0.2921	0.1021	0.310955	NA	-0.3021	-1	1	0.48865	NA	-0.5715	NA	1	0.828825	NA	0.0009	-0.3328	0.3282	0.739224	NA	0.099	-0.0552	0.2471	0.163149	NA	0.1958
frontal cortex	Right medial orbitofrontal gyrus	mOFG_R	YES	0.0899	-0.0862	0.263	0.315577	NA	0.8159	-1	1	0.19001	NA	0.9355	-1	NA	0.859	NA	-0.1798	-0.5171	0.2247	0.37089	NA	0.1102	-0.0799	0.2933	0.252728	NA	0.6232	0.1763	1	0.129395	NA	-0.9271	NA	1	0.513062	NA	-0.1623	-0.4781	0.2093	0.395555	NA	0.1332	-0.0207	0.28	0.0825239	NA	0.4863
temporal cortex	Right middle temporal gyrus	MTG_R	YES	0.1731	-0.0147	0.3488	0.0726173	NA	0.5138	0.0172	0.9947	0.199386	NA	-0.6022	-1	NA	0.910085	NA	0.0276	-0.3741	NA	0.897602	NA	0.1292	NA	0.3194	0.212911	NA	0.7267	-1	NA	0.182211	NA	0.087	-1	1	0.959918	NA	-0.0662	NA	0.2565	0.696645	NA	0.1622	0.0071	0.3102	0.0396863	NA	0.124
temporal cortex	Right parahippocampal gyrus	Par_R	YES	-0.0021	-0.1877	0.182	0.981987	NA	0.2328	-1	0.9545	0.441117	NA	0.0795	-1	1	0.969015	NA	-0.1948	-0.5032	0.1686	0.410676	NA	0.1195	-0.0798	0.3069	0.235725	NA	0.8231	0.8231	1	0.0210414	NA	-0.9863	NA	1	0.116465	NA	-0.2176	-0.5125	0.1431	0.232184	NA	0.0788	-0.0885	0.2413	0.352493	NA	0.7737
frontal cortex	Right pars opercularis	Opr_R	YES	0.0398	-0.1534	0.2329	0.635131	NA	-0.2975	-1	1	0.579994	NA	0.7657	-1	NA	1	NA	0.3566	-0.2102	0.6776	0.208014	NA	0.062	-0.1261	0.2458	0.50489	NA	0.8259	-1	1	0.19393	NA	-0.7679	-1	1	0.664474	NA	-0.1975	-0.4727	0.1379	0.2336	NA	-0.0544	-0.2075	0.1	0.469439	NA	-0.7898
frontal cortex	Right pars orbitalis	Orb_R	YES	0.0539	-0.1193	0.2247	0.50593	NA	0.5089	0.1168	1	0.225335	NA	-0.996	NA	1	0.717605	NA	-0.2123	-0.5348	0.1683	0.269074	NA	0.0953	-0.0879	0.2724	0.297574	NA	0.6915	0.3045	1	0.116956	NA	-0.9878	NA	1	0.487133	NA	-0.1276	-0.4087	0.1677	0.389958	NA	0.0634	-0.0896	0.2141	0.367938	NA	0.0014
frontal cortex	Right pars triangularis	Tri_R	YES	-0.1011	-0.2855	0.09	0.513569	NA	0.0062	-1	1	0.984965	NA	1	-1	NA	0.826434	NA	-0.3304	-0.6506	0.1094	0.185293	NA	-0.0018	-0.1889	0.1863	0.887361	NA	0.4508	-1	1	0.432386	NA	-1	NA	1	0.75873	NA	-0.2111	-0.4603	0.079	0.148953	NA	0.0612	-0.0964	0.216	0.427008	NA	0.3396
anterior cingulum	Right rostral anterior cingulate gyrus	ACr_R	YES	-0.085	-0.2747	0.1129	0.389581	NA	-0.4154	-1	1	0.719676	NA	-0.6488	NA	1	0.622878	NA	-0.0347	-0.4428	0.4029	0.880421	NA	-0.0438	-0.2313	0.1445	1	NA	0.1647	-1	1	0.837712	NA	-0.5496	-1	1	0.632101	NA	-0.1072	-0.4166	0.2645	0.505309	NA	0.049	-0.1117	0.2053	0.412954	NA	-0.2604
frontal cortex	Right rostral middle frontal gyrus	rMFG_R	YES	0.0423	-0.0408	0.2116	0.610176	NA	0.1354	NA	NA	0.588246	NA	-1	NA	1	0.907978	NA	-0.0372	NA	0.3219	0.79602	NA	-0.0992	-0.2814	0.0912	0.305785	NA	-0.4905	-1	1	0.393937	NA	1	-1	NA	0.783194	NA	-0.036	-0.319	0.2502	0.783478	NA	0.0627	-0.0904	0.2122	0.420558	NA	0.0479
frontal cortex	Right superior frontal gyrus	SFG_R	YES	-0.0472	-0.2154	0.1248	0.593043	NA	-0.3764	NA	1	0.776424	NA	1	-1	NA	0.912322	NA	-0.0492	NA	NA	0.795794	NA	-0.0044	-0.1893	0.1797	0.962714	NA	0.1929	-1	1	0.866223	NA	-1	NA	NA	0.861902	NA	-0.0428	-0.3695	NA	0.809835	NA	0.0629	-0.0728	NA	0.390397	NA	0.4785
temporal cortex	Right superior temporal gyrus	STG_R	YES	0.1023	-0.0809	0.2802	0.272932	NA	0.3551	-0.4879	0.9297	0.349312	NA	-0.9736	NA	NA	0.964547	NA	-0.0812	-0.5354	0.3952	0.768724	NA	0.1141	-0.0713	0.29	0.223828	NA	0.7102	-1	1	0.207075	NA	-0.5352	NA	1	0.690598	NA	-0.0109	-0.3036	0.1669	0.943192	NA	0.0978	-0.0612	0.2555	0.226338	NA	0.301
frontal cortex	Right frontal pole	FP_R	YES	-0.1354	-0.304	0.0441	0.13587	NA	-0.5208	-1	1	0.292746	NA	-1	NA	1	0.761051	NA	-0.0341	-0.3676	0.325	0.855317	NA	-0.0406	NA	0.1325	0.644631	NA	-0.0804	NA	0.1384	0.894874	NA	-1	NA	1	0.976069	NA	-0.0694	NA	0.2033	0.614288	NA	-0.0124	-0.1549	0.1306	0.864889	NA	-0.3307
temporal cortex	Right temporal pole	TP_R	YES	0.0165	-0.1585	0.1603	0.820724	NA	-0.0084	NA	NA	1	NA	0.9567	-1	NA	0.641162	NA	0.0264	-0.3333	0.4076	0.891632	NA	0.0257	-0.1608	0.2094	0.763611	NA	0.0129	-0.8434	0.7907	0.961857	NA	-0.8611	NA	NA	0.85426	NA	0.1072	-0.2251	0.4209	0.686703	NA	0.0458	-0.1044	0.1916	0.411415	NA	-0.4951
temporal cortex	Right transverse temporal gyrus	TTG_R	YES	0.0343	-0.1432	0.21	0.721089	NA	0.0577	-1	1	1	NA	-0.3011	NA	1	1	NA	0.0782	-0.2753	0.3857	0.649332	NA	-0.0619	-0.2344	0.1155	0.46357	NA	-0.0447	-1	1	0.857631	NA	0.971	-1	NA	0.729261	NA	-0.1394	-0.433	0.1955	0.40325	NA	0.0547	-0.1037	0.2086	0.496015	NA	0.3449
insular cortex	Right insula	Ins_R	YES	-0.0576	-0.2429	0.1352	0.770451	NA	-0.159	-1	1	0.652638	NA	-0.3037	-1	1	0.938773	NA	-0.0728	-0.4164	0.2795	0.652289	NA	-0.1272	-0.3011	0.0572	0.170846	NA	-0.4887	-1	1	0.338248	NA	-0.8619	-1	1	0.685372	NA	-0.1041	-0.3638	0.1705	0.458449	NA	-0.0574	-0.2095	0.0973	0.448285	NA	-0.7356
white matter FA	Left anterior thalamic radiation	ATR_L	YES	0.0582	NA	NA	0.541184	NA	0.2517	-0.9999	1	0.729124	NA	-0.8004	NA	1	0.83932	NA	0.0629	NA	0.396	0.727367	NA	0.0191	-0.1695	0.2044	0.842524	NA	0.2793	-1	NA	0.729311	NA	-0.8144	-1	NA	0.416544	NA	0.1505	-0.1782	NA	0.374671	NA	-0.0044	-0.1659	0.1563	0.942807	NA	-0.3648
white matter FA	Right anterior thalamic radiation	ATR_R	YES	0.0722	NA	0.2541	0.462901	NA	0.1858	-0.5491	0.9174	0.662394	NA	-0.9654	NA	1	0.557526	NA	0.1039	-0.2664	0.4642	0.602713	NA	-0.0438	-0.2283	0.1428	0.658928	NA	-0.1778	-1	1	0.817117	NA	-0.9265	-1	1	0.614841	NA	0.1177	-0.2292	0.4289	0.518359	NA	-0.0605	-0.2192	0.104	0.471483	NA	-0.549
white matter FA	Left corticospinal tract	CST_L	YES	0.1103	-0.0849	0.2976	0.265042	NA	0.22	-1	NA	0.622879	NA	-0.638	NA	NA	0.540104	NA	0.219	NA	NA	0.248452	NA	0.0534	-0.1605	0.236	0.624414	NA	0.156	-1	1	0.766492	NA	-0.7738	-1	1	0.286808	NA	0.2259	NA	0.5368	0.250538	NA	0.1154	NA	0.2753	0.171436	NA	-0.0169
white matter FA	right corticospinal tract	CST_R	YES	0.1303	0.041	0.3139	0.183698	NA	0.2002	-0.4641	NA	0.506395	NA	-0.8506	-1	NA	0.498015	NA	0.2059	-0.2187	0.5511	0.337418	NA	0.0216	-0.1867	0.2264	0.839734	NA	0.5106	NA	0.9887	0.180305	NA	-0.8883	NA	-0.8883	0.087185	NA	-0.1036	-0.3536	0.279	0.593768	NA	0.1391	NA	0.3051	0.119908	NA	0.1831
white matter FA	Left cingulum (cingulate gyrus)	CGC_L	YES	-0.0077	NA	0.202	0.943034	NA	-0.1346	NA	0.2213	0.633107	NA	-0.5502	-1	1	0.672769	NA	0.2081	-0.1718	0.5327	0.288087	NA	0.0675	-0.1312	0.2587	0.502493	NA	0.5121	NA	NA	0.415867	NA	-0.3495	-1	NA	0.731309	NA	-0.0012	-0.3166	NA	1	NA	-0.0636	-0.2303	0.1074	0.46276	NA	-0.5023
white matter FA	Right cingulum (cingulate gyrus)	CGC_R	YES	-0.0343	-0.2345	0.1713	0.743117	NA	-0.3723	NA	1	0.499606	NA	-0.4964	-1	1	0.748429	NA	0.1725	-0.223	0.5017	0.393264	NA	-0.0117	-0.2025	0.1789	0.904621	NA	0.3901	-0.034	NA	0.781964	NA	-0.6283	-1	1	0.701479	NA	-0.0484	-0.3438	0.2531	0.758958	NA	-0.0684	-0.2334	0.0984	0.425454	NA	-0.719
white matter FA	Left cingulum (hippocampus)	CGH_L	YES	0.1657	-0.0427	0.3602	0.116993	NA	0.3206	-0.523	0.8797	0.382127	NA	-0.9997	NA	1	0.481517	NA	0.2122	-0.2232	0.5667	0.339446	NA	-0.0086	-0.1974	0.1773	0.929519	NA	0.0835	-1	NA	0.833547	NA	-0.9793	-1	1	0.661001	NA	-0.0204	-0.3901	0.3472	0.917884	NA	-0.0074	-0.1637	0.1476	0.925474	NA	-0.1101
white matter FA	Right cingulum (hippocampus)	CGH_R	YES	-0.0488	-0.2467	0.1532	0.635418	NA	-0.0794	NA	0.0717	0.848271	NA	-0.9688	NA	NA	0.271404	NA	0.0655	-0.2895	0.1271	0.733713	NA	-0.1088	-0.2973	0.087	0.271565	NA	0.0921	NA	1	0.863025	NA	-0.8977	-0.9282	NA	0.0843676	NA	0.0443	-0.0268	0.3418	0.781592	NA	0	-0.1639	0.162	1	NA	-0.2126
white matter FA	Forceps major	Fmajor	YES	-0.0143	-0.2135	0.1919	0.891712	NA	-0.1407	-0.4323	NA	0.738328	NA	-0.9937	NA	1	0.503491	NA	0.1568	-0.2641	NA	0.464176	NA	-0.1312	-0.3171	NA	0.192243	NA	-0.027	NA	NA	0.961083	NA	-0.7468	-1	NA	0.319799	NA	-0.103	-0.397	NA	0.521249	NA	-0.0052	-0.1721	0.1612	0.951579	NA	-0.644
white matter FA	Forceps minor	Fminor	YES	0.0275	-0.1663	0.2211	0.783611	NA	-0.1137	-1	NA	0.790841	NA	-0.3039	-1	1	0.843085	NA	0.2044	-0.2324	0.5611	0.35845	NA	-0.1094	-0.2978	0.0864	0.336453	NA	0.1272	-1	1	0.812963	NA	-0.9014	-1	1	0.092465	NA	0.0871	-0.2395	0.3382	0.609102	NA	0.0048	-0.1633	0.1713	0.955177	NA	-0.2233
white matter FA	Left inferior fronto-occipital fasciculus	IFOF_L	YES	0.0455	-0.1539	0.237	0.654512	NA	0.1953	NA	1	0.801327	NA	-1	NA	1	0.581418	NA	0.0808	-0.2924	NA	0.679918	NA	-0.0367	-0.2044	0.1413	0.688229	NA	-0.3936	NA	NA	0.656001	NA	-1	NA	1	0.710614	NA	0.1199	NA	NA	0.43738	NA	0.0081	-0.1215	0.1623	0.919267	NA	-0.7516
white matter FA	Right inferior fronto-occipital fasciculus	IFOF_R	YES	0.074	-0.1234	0.2634	0.460271	NA	-0.1396	NA	NA	0.705912	NA	-1	NA	1	0.69653	NA	0.3829	-0.0212	0.6662	0.0614564	NA	-0.1206	-0.297	NA	0.202887	NA	-0.689	NA	NA	0.26722	NA	-0.9958	NA	NA	0.891141	NA	0.0541	NA	0.3361	0.71608	NA	-0.0638	-0.2241	NA	0.441466	NA	-0.7892
white matter FA	Left inferior longitudinal fasciculus	ILF_L	YES	-0.0409	-0.2249	0.1497	0.674217	NA	-0.2073	-0.9521	0.7318	0.655982	NA	-0.9693	NA	NA	0.256351	NA	0.1381	-0.2314	0.4526	0.468538	NA	-0.0336	-0.2173	0.1514	0.724512	NA	0.224	-1	1	0.676757	NA	-0.9091	-1	1	0.370527	NA	-0.042	-0.3429	0.2652	0.792764	NA	0.0137	-0.1436	NA	0.863855	NA	-0.7364
white matter FA	Right inferior longitudinal fasciculus	ILF_R	YES	0.0186	-0.1743	0.2123	0.85702	NA	-0.178	-0.9936	0.7787	0.694	NA	-0.9963	NA	1	0.516438	NA	0.2635	-0.1013	0.5576	0.152715	NA	-0.1135	-0.3031	0.086	0.259859	NA	-0.0024	-0.6337	0.7122	1	NA	-0.7014	-0.9759	NA	0.535961	NA	-0.2441	-0.504	0.0844	0.137714	NA	-0.0132	-0.174	NA	0.871177	NA	-0.3906
white matter FA	Left superior longitudinal fasciculus	SLF_L	YES	-0.0845	NA	0.1115	0.393396	NA	-0.7493	-0.8267	-0.4697	0.166907	NA	-0.8959	NA	1	0.569934	NA	0.2998	-0.0781	0.5989	0.118025	NA	-0.0897	-0.2777	0.1056	0.362913	NA	-0.2252	-0.9425	0.1827	0.554866	NA	-0.2698	NA	1	0.984821	NA	-0.0458	-0.3752	NA	0.802124	NA	-0.0409	-0.2026	0.1245	0.625375	NA	-0.619
white matter FA	Right superior longitudinal fasciculus	SLF_R	YES	0.0593	-0.1455	0.2573	0.572735	NA	0.1783	-0.3989	0.8945	0.625638	NA	-0.3275	-0.9792	NA	0.865903	NA	0.0243	-0.3539	0.4034	0.906259	NA	-0.0326	-0.2241	0.1615	0.742881	NA	0.0533	-0.9654	0.9262	0.916889	NA	-0.8391	-1	1	0.552403	NA	0.0238	NA	0.3166	0.877897	NA	-0.0178	-0.1755	0.1449	0.833261	NA	-0.4677
white matter FA	Left uncinate fasciculus	UNC_L	YES	0.0755	-0.1228	0.2696	0.474298	NA	0.0964	-1	1	1	NA	-0.726	NA	1	0.961299	NA	0.1762	-0.2111	0.5153	0.375012	NA	0.0416	-0.1412	0.2195	0.66255	NA	-0.0586	-1	0.4869	0.870659	NA	-0.9574	NA	1	0.630984	NA	0.3299	-0.0924	0.6185	0.11541	NA	-0.0161	-0.179	0.1508	0.870576	NA	-0.3069
white matter FA	Right uncinate fasciculus	UNC_R	YES	-0.0305	NA	0.0495	0.75156	NA	-0.2682	-0.9363	NA	0.550355	NA	-0.6672	-1	NA	0.811768	NA	0.1276	-0.2778	NA	0.549312	NA	-0.067	NA	0.1205	0.479297	NA	-0.1167	-1	NA	0.878552	NA	-0.9499	NA	NA	0.0975721	NA	0.1802	NA	0.4748	0.279591	NA	-0.0448	-0.2016	NA	0.568555	NA	-0.2906
white matter FA	Left superior longitudinal fasciculus (temporal part)	SLFtemp_L	YES	-0.0591	-0.2496	0.1392	0.556454	NA	-0.6359	NA	NA	0.518981	NA	-0.431	NA	1	0.878148	NA	0.0911	-0.3186	NA	0.667233	NA	-0.0028	-0.1924	NA	0.977375	NA	0.0014	NA	1	0.995389	NA	-0.6956	NA	NA	0.810201	NA	0.0055	-0.3679	0.3701	0.977902	NA	-0.0018	-0.1595	0.1578	0.982497	NA	-0.0471
white matter FA	Right superior longitudinal fasciculus (temporal part)	SLFtemp_R	YES	-0.0357	-0.2269	0.1599	0.720323	NA	0.1617	NA	NA	0.79864	NA	-0.9786	NA	NA	0.535738	NA	-0.0916	-0.426	0.2958	0.637314	NA	-0.1332	-0.32	0.0644	0.182684	NA	-0.8016	-0.9885	1	0.269335	NA	-0.778	-1	NA	0.484845	NA	0.1978	-0.1315	0.4768	0.232788	NA	-0.0344	-0.2047	0.1379	0.694841	NA	-0.5824
white matter MD	Left anterior thalamic radiation	ATR_L	YES	-0.1061	-0.2948	0.0919	0.295043	NA	-0.5637	-1	NA	0.115356	NA	0.6813	-1	1	0.699881	NA	0.1785	-0.1681	0.4698	0.307794	NA	0.0317	-0.1541	0.2166	0.739964	NA	0.1242	-0.4563	1	0.842332	NA	0.7449	-1	1	0.488453	NA	-0.1909	-0.4531	0.1126	0.214078	NA	0.0028	-0.1701	0.1763	0.974498	NA	-0.0707
white matter MD	Right anterior thalamic radiation	ATR_R	YES	-0.1751	-0.3572	0.0238	0.0824545	NA	-0.5368	-1	NA	0.22517	NA	-0.6749	-1	1	0.676816	NA	0.0443	-0.4431	0.4707	0.869239	NA	0.061	-0.1345	0.2518	0.541723	NA	0.2465	-1	1	0.777768	NA	0.5501	-1	1	0.535676	NA	-0.1201	-0.4042	0.1692	0.432508	NA	0.0094	-0.1695	0.188	0.917826	NA	0.1977
white matter MD	Left corticospinal tract	CST_L	YES	-0.0452	-0.2394	0.1517	0.653528	NA	0.009	-1	1	0.988936	NA	0.798	NA	1	0.44504	NA	-0.2025	-0.5273	NA	0.29794	NA	-0.1264	-0.3065	0.0666	0.196311	NA	-0.3296	-0.7351	0.2095	0.19758	NA	0.5402	-1	1	0.564158	NA	-0.0193	-0.3846	0.3293	0.919928	NA	-0.0177	-0.1796	0.1451	0.830869	NA	0.27
white matter MD	right corticospinal tract	CST_R	YES	-0.1978	-0.3767	-0.0004	0.0482167	NA	-0.5734	-0.9507	NA	0.0619598	NA	0.562	-1	NA	0.761985	NA	0.0419	-0.3152	0.3833	0.825627	NA	-0.1445	-0.3181	NA	0.12573	NA	-0.3662	-0.8024	0.036	0.0776503	NA	0.7649	-1	NA	0.323408	NA	-0.0333	-0.3778	0.3147	0.859148	NA	-0.0849	-0.2532	0.0877	0.333365	NA	-0.0518
white matter MD	Left cingulum (cingulate gyrus)	CGC_L	YES	-0.1451	-0.3256	0.0479	0.137417	NA	-0.7554	-1	-0.6596	0.0204049	NA	0.8209	-1	NA	0.387975	NA	0.2998	-0.0915	0.5889	0.126966	NA	-0.0823	-0.2625	0.1054	0.386082	NA	-0.0096	NA	0.9721	0.964923	NA	0.6659	-1	1	0.483052	NA	-0.4323	-0.656	-0.1322	0.00601821	NA	-0.0473	-0.2161	0.1236	0.587438	NA	0.1581
white matter MD	Right cingulum (cingulate gyrus)	CGC_R	YES	-0.1052	-0.2942	0.0956	0.299496	NA	-0.4908	-1	NA	0.0985345	NA	0.4065	-1	NA	0.811874	NA	0.3031	-0.09	0.5973	0.123657	NA	-0.0101	-0.1955	0.1804	0.917325	NA	0.1454	-0.6806	1	0.745135	NA	0.6793	-1	1	0.53695	NA	-0.2763	-0.5385	0.0374	0.0824976	NA	-0.0428	-0.2082	0.1264	0.618545	NA	0.3872
white matter MD	Left cingulum (hippocampus)	CGH_L	YES	-0.0975	NA	0.1074	0.349508	NA	-0.1287	-1	1	0.570932	NA	1	-1	NA	0.490817	NA	-0.1729	-0.5603	0.2778	0.458782	NA	0.0488	-0.1397	0.2343	0.613658	NA	-0.1281	NA	1	0.753315	NA	0.9891	-1	NA	0.486762	NA	0.105	-0.2387	NA	0.551125	NA	-0.0942	-0.2579	0.0744	0.270457	NA	-0.3317
white matter MD	Right cingulum (hippocampus)	CGH_R	YES	-0.0087	-0.2046	0.1862	0.931087	NA	-0.0864	-1	NA	0.872352	NA	0.8378	NA	NA	0.443485	NA	-0.0925	-0.4893	NA	0.66903	NA	0.1436	NA	0.3252	0.138277	NA	0.6693	-1	NA	0.273156	NA	0.8899	-1	NA	0.213723	NA	-0.2744	NA	0.0731	0.117266	NA	0.0233	-0.144	0.1874	0.784085	NA	0.4938
white matter MD	Forceps major	Fmajor	YES	0.0184	-0.1784	0.213	0.854888	NA	0.1151	-0.5197	0.7102	0.69828	NA	-0.0569	NA	1	0.962114	NA	-0.0726	-0.3836	0.2528	0.666699	NA	0.0232	-0.1703	0.2148	0.814373	NA	-0.0184	-1	NA	0.959272	NA	0.2168	-1	1	0.804238	NA	0.0337	-0.2842	0.3483	0.839749	NA	0.0764	-0.098	0.2447	0.386785	NA	0.3905
white matter MD	Forceps minor	Fminor	YES	-0.0513	-0.2396	0.1399	0.598848	NA	-0.1211	-0.7755	0.6179	0.721311	NA	0.2222	NA	1	0.84093	NA	-0.1974	-0.5323	0.1983	0.324972	NA	0.0849	-0.0978	0.2647	0.360671	NA	0.1056	-1	1	0.910222	NA	0.879	-1	1	0.209827	NA	-0.1362	-0.407	0.1697	0.375882	NA	0.0517	-0.1188	0.2184	0.548669	NA	0.6606
white matter MD	Left inferior fronto-occipital fasciculus	IFOF_L	YES	-0.0755	-0.2684	0.1256	0.457768	NA	-0.3119	NA	-0.3119	0.246204	NA	0.7929	-1	1	0.600812	NA	0.0153	-0.4146	0.4264	0.952145	NA	0.0594	-0.1193	0.237	0.483326	NA	-0.0598	-1	1	0.949567	NA	0.8576	-1	NA	0.389617	NA	-0.051	-0.3514	0.2203	0.75074	NA	0.0204	-0.1485	0.189	0.813187	NA	0.1587
white matter MD	Right inferior fronto-occipital fasciculus	IFOF_R	YES	-0.1341	-0.3106	0.0549	0.160231	NA	-0.306	-0.8405	0.2571	0.226175	NA	0.6644	-1	1	0.689521	NA	-0.1077	-0.5017	NA	0.623974	NA	0.1919	0.0175	0.3564	0.0312802	NA	0.5692	-1	NA	0.148682	NA	0.744	NA	1	0.611922	NA	-0.1133	-0.3995	0.2007	0.47772	NA	0.0483	-0.1309	0.2226	0.551179	NA	0.3447
white matter MD	Left inferior longitudinal fasciculus	ILF_L	YES	-0.0204	-0.2281	0.1904	0.850358	NA	-0.1616	-0.9375	0.6594	0.665911	NA	0.7107	NA	1	0.414862	NA	-0.1337	-0.5075	0.2683	0.534429	NA	0.0409	-0.1426	0.2251	0.664889	NA	-0.141	-1	1	0.671415	NA	0.8037	NA	1	0.382187	NA	0.0414	-0.3195	NA	0.830184	NA	0.0801	-0.0783	0.2335	0.318639	NA	0.6449
white matter MD	Right inferior longitudinal fasciculus	ILF_R	YES	-0.0834	-0.2641	0.1047	0.382125	NA	-0.0375	-0.6111	0.4912	0.858978	NA	0.8465	-1	1	0.633378	NA	-0.3071	-0.6049	NA	0.122335	NA	0.147	-0.0287	0.3146	0.102505	NA	0.5151	-1	1	0.327968	NA	0.9288	-1	1	0.430974	NA	-0.1727	-0.4774	0.1918	0.349814	NA	0.1171	-0.0554	0.2801	0.178434	NA	0.5808
white matter MD	Left superior longitudinal fasciculus	SLF_L	YES	-0.1242	-0.3204	0.0844	0.241863	NA	-0.4172	-1	-0.3623	0.359108	NA	-0.0646	NA	1	0.979176	NA	0.0332	-0.3708	0.4145	0.876554	NA	0.0752	-0.1048	0.2519	0.411769	NA	0.1266	-0.3877	NA	0.508773	NA	0.3403	NA	1	0.90225	NA	-0.0971	-0.4611	0.3101	0.644523	NA	0.063	-0.1076	0.229	0.467077	NA	0.3482
white matter MD	Right superior longitudinal fasciculus	SLF_R	YES	-0.216	NA	-0.0267	0.0257097	NA	-0.5981	NA	-0.2334	0.0437617	NA	0.635	NA	NA	0.82338	NA	0.0087	NA	0.298	0.960106	NA	0.0402	-0.1401	NA	0.662597	NA	0.395	-1	1	0.290228	NA	0.6234	NA	1	0.910785	NA	-0.3047	-0.545	NA	0.0505663	NA	-0.0017	-0.1769	0.1719	0.984567	NA	0.3284
white matter MD	Left uncinate fasciculus	UNC_L	YES	-0.0679	-0.2657	0.1367	0.515657	NA	-0.1999	-1	1	0.675051	NA	-0.1216	-1	1	0.919632	NA	-0.0219	-0.4009	0.4081	0.919061	NA	0.0615	-0.1213	0.2418	0.51002	NA	0.087	-1	1	0.729899	NA	0.7998	-1	1	0.646062	NA	-0.0849	-0.4293	0.281	0.657995	NA	0.027	-0.1524	0.2054	0.769835	NA	0.1299
white matter MD	Right uncinate fasciculus	UNC_R	YES	-0.1312	-0.3161	0.0671	0.190372	NA	-0.3325	-1	0.3023	0.178476	NA	0.9297	-1	1	0.462476	NA	-0.0345	-0.4507	0.3927	0.881434	NA	0.1139	-0.072	0.2935	0.231458	NA	0.4046	-1	1	0.638012	NA	0.8075	-1	1	0.580544	NA	0.029	-0.2591	0.3115	0.846453	NA	0.0213	-0.1467	0.1869	0.803279	NA	0.2246
white matter MD	Left superior longitudinal fasciculus (temporal part)	SLFtemp_L	YES	-0.0367	-0.2516	0.1859	0.74659	NA	-0.2329	-1	1	0.510876	NA	0.4956	-1	1	0.70122	NA	0.0933	-0.3289	0.4298	0.649557	NA	-0.0202	-0.2206	0.1822	0.845505	NA	-0.057	-0.9828	0.6372	0.875375	NA	0.1986	NA	1	0.794978	NA	-0.0852	NA	0.296	0.670798	NA	0.0406	-0.1158	0.195	0.609189	NA	0.3136
white matter MD	Right superior longitudinal fasciculus (temporal part)	SLFtemp_R	YES	-0.0171	-0.207	0.1763	0.862228	NA	0.1049	NA	1	0.876555	NA	0.8642	-1	NA	0.351335	NA	-0.3135	-0.6766	0.2364	0.29338	NA	0.1231	NA	0.3077	0.209994	NA	0.3722	-1	1	0.350431	NA	0.8149	-1	NA	0.393935	NA	-0.2042	-0.5091	0.156	0.261925	NA	-0.0075	-0.177	0.1623	0.931202	NA	0.3656
[truncated: 14 more columns]

## Sheet: Associations changes YSR
				Assessment #1 to #2: 10 to 13 years																				Assessment #2 to #3: 13 to 18 years																				Assessment #1 to #3: 10 to 18 years
Brain measure				Phenotypic association					Genetic association					Common environment association					Unique environment association					Phenotypic association					Genetic association					Common environment association					Unique environment association					Phenotypic association					Genetic association
atlas	region	abbreviation	correct global brain	estimate	lower CI	upper CI	p-value (0)	p-value (1)	estimate	lower CI	upper CI	p-value (0)	p-value (1)	estimate	lower CI	upper CI	p-value (0)	p-value (1)	estimate	lower CI	upper CI	p-value (0)	p-value (1)	estimate	lower CI	upper CI	p-value (0)	p-value (1)	estimate	lower CI	upper CI	p-value (0)	p-value (1)	estimate	lower CI	upper CI	p-value (0)	p-value (1)	estimate	lower CI	upper CI	p-value (0)	p-value (1)	estimate	lower CI	upper CI	p-value (0)	p-value (1)	estimate
global	Total brain volume	TBV	NO	NA	NA	NA	NA	NA	NA	NA	NA	NA	NA	NA	NA	NA	NA	NA	NA	NA	NA	NA	NA	-0.1072	-0.2701	0.0624	0.211973	NA	-0.3979	-1	1	0.541149	NA	-1	NA	1	0.78224	NA	0.0186	-0.2794	0.277	0.890255	NA	NA	NA	NA	NA	NA	NA
global	Global white matter mean fractional anisotropy	GFA	NO	NA	NA	NA	NA	NA	NA	NA	NA	NA	NA	NA	NA	NA	NA	NA	NA	NA	NA	NA	NA	0.114	-0.0605	0.2824	0.199809	NA	0.7065	-1	1	0.540063	NA	0.9032	-1	NA	0.795794	NA	0.0001	-0.2955	0.2704	0.977938	NA	NA	NA	NA	NA	NA	NA
global	Global white matter mean diffusivity	GMD	NO	NA	NA	NA	NA	NA	NA	NA	NA	NA	NA	NA	NA	NA	NA	NA	NA	NA	NA	NA	NA	-0.099	-0.2662	0.0771	0.26717	NA	0.1474	-1	1	0.904774	NA	-0.9832	NA	1	0.470735	NA	-0.0763	-0.3184	0.1826	0.559975	NA	NA	NA	NA	NA	NA	NA
global	Total cortical gray matter volume	CGM	YES	NA	NA	NA	NA	NA	NA	NA	NA	NA	NA	NA	NA	NA	NA	NA	NA	NA	NA	NA	NA	-0.0654	-0.2255	0.1001	0.434132	NA	-0.1393	-1	1	0.779222	NA	-0.9973	NA	1	0.890232	NA	-0.0554	-0.3	0.1855	0.64367	NA	NA	NA	NA	NA	NA	NA
global	Total subcortical gray matter volume	SGM	YES	NA	NA	NA	NA	NA	NA	NA	NA	NA	NA	NA	NA	NA	NA	NA	NA	NA	NA	NA	NA	0.0396	-0.1281	0.2068	0.64966	NA	0.1243	-1	1	1	NA	-0.0038	-1	1	1	NA	0.0278	-0.2316	0.3059	0.824711	NA	NA	NA	NA	NA	NA	NA
global	Total cortical white matter volume	WMV	YES	NA	NA	NA	NA	NA	NA	NA	NA	NA	NA	NA	NA	NA	NA	NA	NA	NA	NA	NA	NA	0.0759	-0.0918	0.2375	0.365792	NA	-0.1143	-1	1	0.865539	NA	0.8602	-1	NA	0.596459	NA	0.0923	-0.1875	0.354	0.512673	NA	NA	NA	NA	NA	NA	NA
subcortical	Left putamen	PUT_L	YES	NA	NA	NA	NA	NA	NA	NA	NA	NA	NA	NA	NA	NA	NA	NA	NA	NA	NA	NA	NA	-0.0476	-0.2044	0.1126	0.548654	NA	-0.2167	-1	1	0.72922	NA	1	-1	NA	0.767043	NA	-0.0396	-0.2959	0.2308	0.763011	NA	NA	NA	NA	NA	NA	NA
subcortical	Left hippocampus	HIP_L	YES	NA	NA	NA	NA	NA	NA	NA	NA	NA	NA	NA	NA	NA	NA	NA	NA	NA	NA	NA	NA	0.0409	-0.124	0.2006	0.663664	NA	0.3317	-1	1	0.63737	NA	0.9675	-1	NA	0.872672	NA	-0.0023	-0.2551	0.232	0.893464	NA	NA	NA	NA	NA	NA	NA
subcortical	Left amygdala	AMY_L	YES	NA	NA	NA	NA	NA	NA	NA	NA	NA	NA	NA	NA	NA	NA	NA	NA	NA	NA	NA	NA	-0.0441	-0.2047	0.1195	0.595498	NA	0.9699	-1	1	0.143093	NA	1	-1	NA	0.902579	NA	-0.2077	-0.4209	0.016	0.0481733	NA	NA	NA	NA	NA	NA	NA
subcortical	Right putamen	PUT_R	YES	NA	NA	NA	NA	NA	NA	NA	NA	NA	NA	NA	NA	NA	NA	NA	NA	NA	NA	NA	NA	0.168	-0.004	0.328	0.052239	NA	0.4628	-1	1	0.518273	NA	-0.6271	-1	1	0.729848	NA	0.1342	-0.1447	0.3968	0.394487	NA	NA	NA	NA	NA	NA	NA
subcortical	Right hippocampus	HIP_R	YES	NA	NA	NA	NA	NA	NA	NA	NA	NA	NA	NA	NA	NA	NA	NA	NA	NA	NA	NA	NA	-0.0044	-0.1697	0.1621	0.888314	NA	0.8735	-1	NA	0.114825	NA	0.9997	-1	NA	0.846018	NA	-0.1761	-0.4102	0.0693	0.154645	NA	NA	NA	NA	NA	NA	NA
subcortical	Right amygdala	AMY_R	YES	NA	NA	NA	NA	NA	NA	NA	NA	NA	NA	NA	NA	NA	NA	NA	NA	NA	NA	NA	NA	-0.1155	-0.2738	0.0508	0.170194	NA	0.775	-1	NA	0.537259	NA	1	-1	NA	0.859765	NA	-0.2191	-0.4517	0.0139	0.065829	NA	NA	NA	NA	NA	NA	NA
temporal cortex	Left banks of superior temporal gyrus	Bank_L	YES	NA	NA	NA	NA	NA	NA	NA	NA	NA	NA	NA	NA	NA	NA	NA	NA	NA	NA	NA	NA	-0.0951	-0.2487	0.0627	0.184806	NA	-0.7083	-1	1	0.544406	NA	-0.9752	NA	1	1	NA	-0.0136	-0.2694	0.2335	0.965707	NA	NA	NA	NA	NA	NA	NA
anterior cingulum	Left caudal anterior cingulate cortex	ACc_L	YES	NA	NA	NA	NA	NA	NA	NA	NA	NA	NA	NA	NA	NA	NA	NA	NA	NA	NA	NA	NA	-0.0832	-0.2438	0.0829	0.322711	NA	-0.4679	-1	1	0.318324	NA	-1	NA	1	0.907103	NA	0.0247	-0.2317	0.2919	0.855401	NA	NA	NA	NA	NA	NA	NA
frontal cortex	Left caudal middle frontal gyrus	cMFG_L	YES	NA	NA	NA	NA	NA	NA	NA	NA	NA	NA	NA	NA	NA	NA	NA	NA	NA	NA	NA	NA	-0.1918	-0.3491	-0.0221	0.0246601	NA	-0.9647	NA	1	0.322051	NA	-0.9898	NA	1	0.460937	NA	-0.0819	-0.3098	0.1628	0.474483	NA	NA	NA	NA	NA	NA	NA
temporal cortex	Left entorhinal gyrus	Ent_L	YES	NA	NA	NA	NA	NA	NA	NA	NA	NA	NA	NA	NA	NA	NA	NA	NA	NA	NA	NA	NA	0.1331	-0.0303	0.288	0.109121	NA	-0.2053	NA	1	0.861011	NA	-0.8753	NA	NA	1	NA	0.1727	-0.0501	0.3911	0.129433	NA	NA	NA	NA	NA	NA	NA
temporal cortex	Left fusiform gyrus	FG_L	YES	NA	NA	NA	NA	NA	NA	NA	NA	NA	NA	NA	NA	NA	NA	NA	NA	NA	NA	NA	NA	-0.0509	-0.2163	0.1218	0.559103	NA	0.6661	-1	1	0.332027	NA	-1	NA	1	0.672512	NA	-0.2052	-0.494	0.0961	0.173233	NA	NA	NA	NA	NA	NA	NA
temporal cortex	Left inferior temporal gyrus	ITG_L	YES	NA	NA	NA	NA	NA	NA	NA	NA	NA	NA	NA	NA	NA	NA	NA	NA	NA	NA	NA	NA	-0.0905	-0.2594	0.0868	0.312382	NA	0.6849	-1	1	0.453168	NA	-1	NA	1	0.180904	NA	-0.0997	-0.3624	0.1666	0.466351	NA	NA	NA	NA	NA	NA	NA
frontal cortex	Left lateral orbitofrontal gyrus	lOFG_L	YES	NA	NA	NA	NA	NA	NA	NA	NA	NA	NA	NA	NA	NA	NA	NA	NA	NA	NA	NA	NA	-0.0821	-0.2405	0.0809	0.307652	NA	-0.7416	-1	1	0.671057	NA	-1	NA	1	0.615153	NA	-0.0284	-0.2545	0.1901	0.765526	NA	NA	NA	NA	NA	NA	NA
frontal cortex	Left medial orbitofrontal gyrus	mOFG_L	YES	NA	NA	NA	NA	NA	NA	NA	NA	NA	NA	NA	NA	NA	NA	NA	NA	NA	NA	NA	NA	-0.0446	-0.205	0.1153	0.467692	NA	0.0736	-1	1	0.864532	NA	-0.9927	NA	1	1	NA	-0.0516	-0.2502	0.1513	0.607868	NA	NA	NA	NA	NA	NA	NA
temporal cortex	Left middle temporal gyrus	MTG_L	YES	NA	NA	NA	NA	NA	NA	NA	NA	NA	NA	NA	NA	NA	NA	NA	NA	NA	NA	NA	NA	-0.0738	-0.2391	0.0954	0.390789	NA	-0.8586	-1	1	0.198273	NA	-0.5915	-1	1	0.647421	NA	0.1442	-0.114	0.3829	0.263358	NA	NA	NA	NA	NA	NA	NA
temporal cortex	Left parahippocampal gyrus	Par_L	YES	NA	NA	NA	NA	NA	NA	NA	NA	NA	NA	NA	NA	NA	NA	NA	NA	NA	NA	NA	NA	-0.0495	-0.2124	0.1159	0.504543	NA	-0.5616	-1	-0.0883	0.341204	NA	-0.9997	NA	1	0.823737	NA	0.0712	-0.1776	0.3047	0.562815	NA	NA	NA	NA	NA	NA	NA
frontal cortex	Left pars opercularis	Opr_L	YES	NA	NA	NA	NA	NA	NA	NA	NA	NA	NA	NA	NA	NA	NA	NA	NA	NA	NA	NA	NA	-0.0528	-0.2181	0.1195	0.470019	NA	-0.4951	-1	1	0.587005	NA	-0.9985	NA	1	1	NA	0.0226	-0.2113	0.2679	0.877457	NA	NA	NA	NA	NA	NA	NA
frontal cortex	Left pars orbitalis	Orb_L	YES	NA	NA	NA	NA	NA	NA	NA	NA	NA	NA	NA	NA	NA	NA	NA	NA	NA	NA	NA	NA	-0.0234	-0.1815	0.1354	0.792449	NA	0.4803	-1	1	0.83953	NA	-1	NA	1	0.686022	NA	-0.0279	-0.2584	0.1929	0.807898	NA	NA	NA	NA	NA	NA	NA
frontal cortex	Left pars triangularis	Tri_L	YES	NA	NA	NA	NA	NA	NA	NA	NA	NA	NA	NA	NA	NA	NA	NA	NA	NA	NA	NA	NA	-0.0775	-0.2439	0.0965	0.377661	NA	0.5055	-1	1	0.315491	NA	-1	NA	1	0.930135	NA	-0.2581	-0.4946	0.0279	0.0811426	NA	NA	NA	NA	NA	NA	NA
anterior cingulum	Left rostral anterior cingulate gyrus	ACr_L	YES	NA	NA	NA	NA	NA	NA	NA	NA	NA	NA	NA	NA	NA	NA	NA	NA	NA	NA	NA	NA	-0.1276	-0.2824	0.0336	0.124015	NA	-0.9993	NA	-0.577	0.291413	NA	-0.722	-1	1	0.739046	NA	-0.0371	-0.2373	0.1705	0.673124	NA	NA	NA	NA	NA	NA	NA
frontal cortex	Left rostral middle frontal gyrus	rMFG_L	YES	NA	NA	NA	NA	NA	NA	NA	NA	NA	NA	NA	NA	NA	NA	NA	NA	NA	NA	NA	NA	-0.0164	-0.1763	0.1448	0.841522	NA	-0.6747	-1	1	0.397854	NA	-0.2568	-1	1	1	NA	0.0565	-0.1576	0.2463	0.586903	NA	NA	NA	NA	NA	NA	NA
frontal cortex	Left superior frontal gyrus	SFG_L	YES	NA	NA	NA	NA	NA	NA	NA	NA	NA	NA	NA	NA	NA	NA	NA	NA	NA	NA	NA	NA	-0.0815	-0.2473	0.0897	0.348385	NA	-0.9796	NA	1	0.250102	NA	1	-1	NA	0.425285	NA	0.0662	-0.2052	0.2946	0.560817	NA	NA	NA	NA	NA	NA	NA
temporal cortex	Left superior temporal gyrus	STG_L	YES	NA	NA	NA	NA	NA	NA	NA	NA	NA	NA	NA	NA	NA	NA	NA	NA	NA	NA	NA	NA	-0.0349	-0.1995	0.1336	0.683603	NA	-0.6804	NA	1	0.593876	NA	0.9999	-1	NA	0.959107	NA	0.0502	-0.214	0.2986	0.710033	NA	NA	NA	NA	NA	NA	NA
frontal cortex	Left frontal pole	FP_L	YES	NA	NA	NA	NA	NA	NA	NA	NA	NA	NA	NA	NA	NA	NA	NA	NA	NA	NA	NA	NA	0.0475	-0.118	0.2115	0.479401	NA	0.1297	-1	1	0.704395	NA	1	-1	NA	0.746824	NA	0.0076	-0.2734	0.2915	0.8253	NA	NA	NA	NA	NA	NA	NA
temporal cortex	Left temporal pole	TP_L	YES	NA	NA	NA	NA	NA	NA	NA	NA	NA	NA	NA	NA	NA	NA	NA	NA	NA	NA	NA	NA	-0.0653	-0.2283	0.1025	0.443623	NA	0.8173	-1	1	0.366871	NA	1	NA	NA	0.421151	NA	-0.246	-0.4689	-0.0276	0.0262126	NA	NA	NA	NA	NA	NA	NA
temporal cortex	Left transverse temporal gyrus	TTG_L	YES	NA	NA	NA	NA	NA	NA	NA	NA	NA	NA	NA	NA	NA	NA	NA	NA	NA	NA	NA	NA	-0.0967	-0.2612	0.0754	0.268465	NA	0.2814	-1	1	0.560839	NA	1	-1	NA	0.596517	NA	-0.1957	-0.412	0.0352	0.0933999	NA	NA	NA	NA	NA	NA	NA
insular cortex	Left insula	Ins_L	YES	NA	NA	NA	NA	NA	NA	NA	NA	NA	NA	NA	NA	NA	NA	NA	NA	NA	NA	NA	NA	-0.2302	-0.383	-0.0654	0.00628323	NA	-0.946	-1	-0.946	0.0993591	NA	0.892	-1	NA	0.709194	NA	-0.1038	-0.3308	0.1678	0.478091	NA	NA	NA	NA	NA	NA	NA
temporal cortex	Right banks of superior temporal gyrus	Bank_R	YES	NA	NA	NA	NA	NA	NA	NA	NA	NA	NA	NA	NA	NA	NA	NA	NA	NA	NA	NA	NA	-0.1241	-0.2828	0.0439	0.144018	NA	0.2938	-0.9882	0.9455	0.52929	NA	-0.9997	NA	1	0.77338	NA	-0.2261	-0.4728	0.0403	0.0877831	NA	NA	NA	NA	NA	NA	NA
anterior cingulum	Right caudal anterior cingulate cortex	ACc_R	YES	NA	NA	NA	NA	NA	NA	NA	NA	NA	NA	NA	NA	NA	NA	NA	NA	NA	NA	NA	NA	-0.0376	-0.2017	0.1292	0.605928	NA	-0.4267	-1	1	0.300096	NA	1	-1	NA	0.648554	NA	0.0076	-0.2578	0.2501	0.956788	NA	NA	NA	NA	NA	NA	NA
frontal cortex	Right caudal middle frontal gyrus	cMFG_R	YES	NA	NA	NA	NA	NA	NA	NA	NA	NA	NA	NA	NA	NA	NA	NA	NA	NA	NA	NA	NA	-0.0538	-0.2164	0.1126	0.52281	NA	0.3842	-1	1	0.618949	NA	-1	NA	1	0.855538	NA	-0.1127	-0.3687	0.1393	0.378274	NA	NA	NA	NA	NA	NA	NA
temporal cortex	Right entorhinal gyrus	Ent_R	YES	NA	NA	NA	NA	NA	NA	NA	NA	NA	NA	NA	NA	NA	NA	NA	NA	NA	NA	NA	NA	0.0488	-0.1137	0.2088	0.561951	NA	-0.3489	NA	1	0.70231	NA	-0.971	NA	1	0.554534	NA	0.1266	-0.1212	0.3866	0.316002	NA	NA	NA	NA	NA	NA	NA
temporal cortex	Right fusiform gyrus	FG_R	YES	NA	NA	NA	NA	NA	NA	NA	NA	NA	NA	NA	NA	NA	NA	NA	NA	NA	NA	NA	NA	-0.1079	-0.2739	0.0671	0.22171	NA	0.3022	-1	1	0.774522	NA	-1	NA	1	0.965206	NA	-0.175	-0.4141	0.0737	0.165068	NA	NA	NA	NA	NA	NA	NA
temporal cortex	Right inferior temporal gyrus	ITG_R	YES	NA	NA	NA	NA	NA	NA	NA	NA	NA	NA	NA	NA	NA	NA	NA	NA	NA	NA	NA	NA	-0.0244	-0.1904	0.1427	0.775069	NA	-0.8932	-1	1	0.429081	NA	1	-1	NA	0.762721	NA	0.0333	-0.1809	0.2446	0.758383	NA	NA	NA	NA	NA	NA	NA
frontal cortex	Right lateral orbitofrontal gyrus	lOFG_R	YES	NA	NA	NA	NA	NA	NA	NA	NA	NA	NA	NA	NA	NA	NA	NA	NA	NA	NA	NA	NA	0.0098	-0.1584	0.1749	0.819707	NA	-0.992	NA	1	0.710694	NA	-0.9769	NA	1	0.39811	NA	0.1636	-0.0921	0.4168	0.198352	NA	NA	NA	NA	NA	NA	NA
frontal cortex	Right medial orbitofrontal gyrus	mOFG_R	YES	NA	NA	NA	NA	NA	NA	NA	NA	NA	NA	NA	NA	NA	NA	NA	NA	NA	NA	NA	NA	-0.1033	-0.2588	0.0591	0.209962	NA	0.0164	-1	1	0.987882	NA	-0.9297	NA	1	0.895279	NA	-0.1227	-0.3833	0.1482	0.386983	NA	NA	NA	NA	NA	NA	NA
temporal cortex	Right middle temporal gyrus	MTG_R	YES	NA	NA	NA	NA	NA	NA	NA	NA	NA	NA	NA	NA	NA	NA	NA	NA	NA	NA	NA	NA	-0.0681	-0.2285	0.0959	0.414138	NA	-0.4776	-1	1	0.80268	NA	1	-1	NA	0.803287	NA	-0.0686	-0.2703	0.1503	0.528354	NA	NA	NA	NA	NA	NA	NA
temporal cortex	Right parahippocampal gyrus	Par_R	YES	NA	NA	NA	NA	NA	NA	NA	NA	NA	NA	NA	NA	NA	NA	NA	NA	NA	NA	NA	NA	-0.0385	-0.2018	0.1263	0.582128	NA	-0.8114	-1	1	0.296658	NA	-0.1155	-1	1	0.720578	NA	0.09	-0.1828	0.3468	0.47696	NA	NA	NA	NA	NA	NA	NA
frontal cortex	Right pars opercularis	Opr_R	YES	NA	NA	NA	NA	NA	NA	NA	NA	NA	NA	NA	NA	NA	NA	NA	NA	NA	NA	NA	NA	-0.072	-0.2323	0.0951	0.392899	NA	0.6793	-1	1	0.247473	NA	-0.9491	NA	1	0.950842	NA	-0.2352	-0.5055	0.0242	0.0747858	NA	NA	NA	NA	NA	NA	NA
frontal cortex	Right pars orbitalis	Orb_R	YES	NA	NA	NA	NA	NA	NA	NA	NA	NA	NA	NA	NA	NA	NA	NA	NA	NA	NA	NA	NA	-0.0226	-0.188	0.1435	0.771537	NA	-0.7882	-1	1	0.404333	NA	-1	NA	1	0.994649	NA	0.0473	-0.1664	0.2622	0.644255	NA	NA	NA	NA	NA	NA	NA
frontal cortex	Right pars triangularis	Tri_R	YES	NA	NA	NA	NA	NA	NA	NA	NA	NA	NA	NA	NA	NA	NA	NA	NA	NA	NA	NA	NA	0.0412	-0.1266	0.2065	0.676508	NA	0.2211	-1	1	1	NA	0.9575	-1	NA	0.905084	NA	0.0179	-0.2105	0.2496	0.91544	NA	NA	NA	NA	NA	NA	NA
anterior cingulum	Right rostral anterior cingulate gyrus	ACr_R	YES	NA	NA	NA	NA	NA	NA	NA	NA	NA	NA	NA	NA	NA	NA	NA	NA	NA	NA	NA	NA	0.0528	-0.1152	0.2146	0.548823	NA	-0.1834	-1	1	0.78906	NA	-0.9605	NA	1	0.901455	NA	0.1344	-0.1529	0.4081	0.325134	NA	NA	NA	NA	NA	NA	NA
frontal cortex	Right rostral middle frontal gyrus	rMFG_R	YES	NA	NA	NA	NA	NA	NA	NA	NA	NA	NA	NA	NA	NA	NA	NA	NA	NA	NA	NA	NA	-0.014	-0.182	0.1543	0.871177	NA	-0.8349	-1	-0.8024	0.175194	NA	-1	NA	1	0.770993	NA	0.1257	-0.1137	NA	0.2966	NA	NA	NA	NA	NA	NA	NA
frontal cortex	Right superior frontal gyrus	SFG_R	YES	NA	NA	NA	NA	NA	NA	NA	NA	NA	NA	NA	NA	NA	NA	NA	NA	NA	NA	NA	NA	0.007	-0.1579	0.1728	0.934585	NA	-0.0534	-1	1	0.983602	NA	-0.9651	NA	NA	1	NA	0.0106	-0.2336	0.2554	0.932912	NA	NA	NA	NA	NA	NA	NA
temporal cortex	Right superior temporal gyrus	STG_R	YES	NA	NA	NA	NA	NA	NA	NA	NA	NA	NA	NA	NA	NA	NA	NA	NA	NA	NA	NA	NA	-0.0097	-0.1772	0.1589	0.910504	NA	-0.7552	-1	1	0.407076	NA	1	-1	NA	0.450209	NA	0.0259	-0.184	0.2426	0.809285	NA	NA	NA	NA	NA	NA	NA
frontal cortex	Right frontal pole	FP_R	YES	NA	NA	NA	NA	NA	NA	NA	NA	NA	NA	NA	NA	NA	NA	NA	NA	NA	NA	NA	NA	-0.0837	-0.2347	0.0715	0.281806	NA	-0.515	-1	1	0.603082	NA	0.9998	-1	NA	0.632641	NA	-0.0681	-0.26	0.1536	0.536668	NA	NA	NA	NA	NA	NA	NA
temporal cortex	Right temporal pole	TP_R	YES	NA	NA	NA	NA	NA	NA	NA	NA	NA	NA	NA	NA	NA	NA	NA	NA	NA	NA	NA	NA	0.152	-0.0082	0.3065	0.0589097	NA	0.1394	-1	1	0.788542	NA	-0.9695	-1	1	0.552065	NA	0.2394	-0.0489	0.5047	0.105556	NA	NA	NA	NA	NA	NA	NA
temporal cortex	Right transverse temporal gyrus	TTG_R	YES	NA	NA	NA	NA	NA	NA	NA	NA	NA	NA	NA	NA	NA	NA	NA	NA	NA	NA	NA	NA	-0.1036	-0.2695	0.0703	0.241301	NA	0.0639	-1	1	0.866932	NA	-0.1406	NA	NA	1	NA	-0.1575	-0.4308	0.1136	0.243593	NA	NA	NA	NA	NA	NA	NA
insular cortex	Right insula	Ins_R	YES	NA	NA	NA	NA	NA	NA	NA	NA	NA	NA	NA	NA	NA	NA	NA	NA	NA	NA	NA	NA	-0.0863	-0.2407	0.0747	0.28194	NA	-0.9332	NA	1	0.345726	NA	1	-1	NA	0.638027	NA	-0.0285	-0.2378	0.1766	0.737815	NA	NA	NA	NA	NA	NA	NA
white matter FA	Left anterior thalamic radiation	ATR_L	YES	NA	NA	NA	NA	NA	NA	NA	NA	NA	NA	NA	NA	NA	NA	NA	NA	NA	NA	NA	NA	0.1591	-0.0099	0.3196	0.0648491	NA	0.9547	-1	1	0.413767	NA	-0.0437	-1	1	0.990127	NA	0.0475	-0.2226	0.3107	0.737784	NA	NA	NA	NA	NA	NA	NA
white matter FA	Right anterior thalamic radiation	ATR_R	YES	NA	NA	NA	NA	NA	NA	NA	NA	NA	NA	NA	NA	NA	NA	NA	NA	NA	NA	NA	NA	0.1193	-0.0563	0.2881	0.180106	NA	0.7441	-1	1	0.413854	NA	0.5293	-1	1	0.884714	NA	-0.0312	-0.3316	0.2563	0.840532	NA	NA	NA	NA	NA	NA	NA
white matter FA	Left corticospinal tract	CST_L	YES	NA	NA	NA	NA	NA	NA	NA	NA	NA	NA	NA	NA	NA	NA	NA	NA	NA	NA	NA	NA	0.0127	-0.1554	0.1812	0.882963	NA	0.5104	-1	1	0.715678	NA	-0.1887	-1	1	0.933039	NA	-0.0288	-0.3059	0.2314	0.828616	NA	NA	NA	NA	NA	NA	NA
white matter FA	right corticospinal tract	CST_R	YES	NA	NA	NA	NA	NA	NA	NA	NA	NA	NA	NA	NA	NA	NA	NA	NA	NA	NA	NA	NA	0.098	-0.0783	0.2692	0.275784	NA	0.9849	0.6902	NA	0.107956	NA	-1	NA	1	0.360426	NA	-0.0515	-0.3314	0.2157	0.717599	NA	NA	NA	NA	NA	NA	NA
white matter FA	Left cingulum (cingulate gyrus)	CGC_L	YES	NA	NA	NA	NA	NA	NA	NA	NA	NA	NA	NA	NA	NA	NA	NA	NA	NA	NA	NA	NA	0.2189	0.039	0.384	0.0169306	NA	0.8032	-1	1	0.503805	NA	0.465	-1	1	0.567497	NA	0.1326	-0.1337	0.3659	0.312612	NA	NA	NA	NA	NA	NA	NA
white matter FA	Right cingulum (cingulate gyrus)	CGC_R	YES	NA	NA	NA	NA	NA	NA	NA	NA	NA	NA	NA	NA	NA	NA	NA	NA	NA	NA	NA	NA	0.1433	-0.0392	0.3164	0.121468	NA	0.7418	-1	1	0.534888	NA	0.9999	NA	NA	0.922001	NA	0.0828	-0.1891	0.3021	0.536313	NA	NA	NA	NA	NA	NA	NA
white matter FA	Left cingulum (hippocampus)	CGH_L	YES	NA	NA	NA	NA	NA	NA	NA	NA	NA	NA	NA	NA	NA	NA	NA	NA	NA	NA	NA	NA	0.0945	-0.0853	0.2652	0.295954	NA	-0.5627	-1	-0.017	0.233941	NA	0.9602	NA	NA	0.928239	NA	0.3314	0.0359	0.5685	0.0287638	NA	NA	NA	NA	NA	NA	NA
white matter FA	Right cingulum (hippocampus)	CGH_R	YES	NA	NA	NA	NA	NA	NA	NA	NA	NA	NA	NA	NA	NA	NA	NA	NA	NA	NA	NA	NA	0.1087	-0.0683	0.2788	0.232806	NA	-0.9007	NA	1	0.768371	NA	0.5437	-1	1	0.593294	NA	0.1289	-0.1377	0.374	0.325501	NA	NA	NA	NA	NA	NA	NA
white matter FA	Forceps major	Fmajor	YES	NA	NA	NA	NA	NA	NA	NA	NA	NA	NA	NA	NA	NA	NA	NA	NA	NA	NA	NA	NA	0.0542	-0.1251	0.2294	0.554705	NA	-0.6695	-1	1	0.610665	NA	0.6801	-1	1	0.678433	NA	0.1195	-0.1913	0.3812	0.432725	NA	NA	NA	NA	NA	NA	NA
white matter FA	Forceps minor	Fminor	YES	NA	NA	NA	NA	NA	NA	NA	NA	NA	NA	NA	NA	NA	NA	NA	NA	NA	NA	NA	NA	0.0914	-0.0871	0.2648	0.314957	NA	0.3838	-1	1	0.782258	NA	0.4468	-1	1	0.615031	NA	-0.0018	-0.2957	0.2552	0.98964	NA	NA	NA	NA	NA	NA	NA
white matter FA	Left inferior fronto-occipital fasciculus	IFOF_L	YES	NA	NA	NA	NA	NA	NA	NA	NA	NA	NA	NA	NA	NA	NA	NA	NA	NA	NA	NA	NA	0.1453	-0.0299	0.3114	0.102122	NA	0.0558	-1	1	0.968789	NA	1	-1	NA	0.706877	NA	0.1372	-0.1397	0.3838	0.324667	NA	NA	NA	NA	NA	NA	NA
white matter FA	Right inferior fronto-occipital fasciculus	IFOF_R	YES	NA	NA	NA	NA	NA	NA	NA	NA	NA	NA	NA	NA	NA	NA	NA	NA	NA	NA	NA	NA	0.0025	-0.1729	0.177	0.977629	NA	-0.8836	NA	1	0.569122	NA	1	-1	NA	0.60764	NA	0.0365	-0.1881	0.2524	0.736203	NA	NA	NA	NA	NA	NA	NA
white matter FA	Left inferior longitudinal fasciculus	ILF_L	YES	NA	NA	NA	NA	NA	NA	NA	NA	NA	NA	NA	NA	NA	NA	NA	NA	NA	NA	NA	NA	0.0702	-0.1066	0.2433	0.436883	NA	0.4473	-1	1	0.745757	NA	1	-1	NA	0.779857	NA	0.001	-0.2841	0.2746	0.994722	NA	NA	NA	NA	NA	NA	NA
white matter FA	Right inferior longitudinal fasciculus	ILF_R	YES	NA	NA	NA	NA	NA	NA	NA	NA	NA	NA	NA	NA	NA	NA	NA	NA	NA	NA	NA	NA	0.122	-0.0565	0.294	0.178856	NA	0.4626	-1	1	0.511497	NA	0.9171	NA	1	0.300919	NA	-0.0259	-0.2963	0.2345	0.84879	NA	NA	NA	NA	NA	NA	NA
white matter FA	Left superior longitudinal fasciculus	SLF_L	YES	NA	NA	NA	NA	NA	NA	NA	NA	NA	NA	NA	NA	NA	NA	NA	NA	NA	NA	NA	NA	0.115	-0.0604	0.2844	0.197766	NA	0.0659	NA	0.4915	0.934575	NA	0.987	-1	NA	0.463643	NA	0.0593	-0.2403	0.3529	0.700967	NA	NA	NA	NA	NA	NA	NA
white matter FA	Right superior longitudinal fasciculus	SLF_R	YES	NA	NA	NA	NA	NA	NA	NA	NA	NA	NA	NA	NA	NA	NA	NA	NA	NA	NA	NA	NA	0.0724	-0.1043	0.2449	0.42169	NA	0.8109	-1	1	0.268463	NA	-0.7781	-1	1	0.862703	NA	-0.0837	-0.3701	0.197	0.575896	NA	NA	NA	NA	NA	NA	NA
white matter FA	Left uncinate fasciculus	UNC_L	YES	NA	NA	NA	NA	NA	NA	NA	NA	NA	NA	NA	NA	NA	NA	NA	NA	NA	NA	NA	NA	0.1822	0.003	0.3481	0.0454232	NA	0.489	-1	1	0.566744	NA	-1	NA	1	0.699206	NA	0.1626	NA	0.4588	0.286292	NA	NA	NA	NA	NA	NA	NA
white matter FA	Right uncinate fasciculus	UNC_R	YES	NA	NA	NA	NA	NA	NA	NA	NA	NA	NA	NA	NA	NA	NA	NA	NA	NA	NA	NA	NA	0.0401	-0.1346	0.2127	0.652385	NA	-0.6416	-1	1	0.694419	NA	1	-1	NA	0.919348	NA	0.0901	-0.1574	0.3324	0.475245	NA	NA	NA	NA	NA	NA	NA
white matter FA	Left superior longitudinal fasciculus (temporal part)	SLFtemp_L	YES	NA	NA	NA	NA	NA	NA	NA	NA	NA	NA	NA	NA	NA	NA	NA	NA	NA	NA	NA	NA	0.0818	-0.0994	0.2584	0.374052	NA	0.3041	-1	1	0.480032	NA	1	-1	NA	0.937002	NA	-0.0136	-0.3225	0.2967	0.933694	NA	NA	NA	NA	NA	NA	NA
white matter FA	Right superior longitudinal fasciculus (temporal part)	SLFtemp_R	YES	NA	NA	NA	NA	NA	NA	NA	NA	NA	NA	NA	NA	NA	NA	NA	NA	NA	NA	NA	NA	0.0118	-0.1706	0.1931	0.899269	NA	0.4104	-1	1	0.628219	NA	-1	NA	1	0.846121	NA	-0.051	-0.3491	0.2362	0.740043	NA	NA	NA	NA	NA	NA	NA
white matter MD	Left anterior thalamic radiation	ATR_L	YES	NA	NA	NA	NA	NA	NA	NA	NA	NA	NA	NA	NA	NA	NA	NA	NA	NA	NA	NA	NA	-0.1685	-0.3338	0.0083	0.0608773	NA	-0.1682	-1	1	0.871496	NA	-1	NA	1	0.576992	NA	-0.1574	-0.3858	0.0914	0.208337	NA	NA	NA	NA	NA	NA	NA
white matter MD	Right anterior thalamic radiation	ATR_R	YES	NA	NA	NA	NA	NA	NA	NA	NA	NA	NA	NA	NA	NA	NA	NA	NA	NA	NA	NA	NA	-0.0943	-0.2668	0.084	0.29808	NA	0.415	-1	1	0.693063	NA	-1	-1	1	0.418018	NA	-0.1069	-0.3544	0.1552	0.419965	NA	NA	NA	NA	NA	NA	NA
white matter MD	Left corticospinal tract	CST_L	YES	NA	NA	NA	NA	NA	NA	NA	NA	NA	NA	NA	NA	NA	NA	NA	NA	NA	NA	NA	NA	0.0674	-0.1036	0.2349	0.437345	NA	0.191	-0.5262	1	0.692995	NA	-1	NA	1	0.699978	NA	0.0771	-0.2522	0.3792	0.662491	NA	NA	NA	NA	NA	NA	NA
white matter MD	right corticospinal tract	CST_R	YES	NA	NA	NA	NA	NA	NA	NA	NA	NA	NA	NA	NA	NA	NA	NA	NA	NA	NA	NA	NA	0.0187	-0.1565	0.1909	0.834134	NA	-0.314	-0.8191	0.811	0.449878	NA	1	-1	NA	0.616741	NA	0.1627	-0.1644	0.45	0.32595	NA	NA	NA	NA	NA	NA	NA
white matter MD	Left cingulum (cingulate gyrus)	CGC_L	YES	NA	NA	NA	NA	NA	NA	NA	NA	NA	NA	NA	NA	NA	NA	NA	NA	NA	NA	NA	NA	-0.0421	-0.2146	0.1341	0.63825	NA	0.5061	-1	1	0.474511	NA	-0.996	NA	1	0.70337	NA	-0.2145	-0.4942	0.136	0.230082	NA	NA	NA	NA	NA	NA	NA
white matter MD	Right cingulum (cingulate gyrus)	CGC_R	YES	NA	NA	NA	NA	NA	NA	NA	NA	NA	NA	NA	NA	NA	NA	NA	NA	NA	NA	NA	NA	0.0148	-0.1589	0.1874	0.868083	NA	0.7747	-1	1	0.235766	NA	-0.9999	NA	1	0.447365	NA	-0.0894	-0.352	0.1715	0.504928	NA	NA	NA	NA	NA	NA	NA
white matter MD	Left cingulum (hippocampus)	CGH_L	YES	NA	NA	NA	NA	NA	NA	NA	NA	NA	NA	NA	NA	NA	NA	NA	NA	NA	NA	NA	NA	-0.147	-0.3131	0.0306	0.102096	NA	0.5401	-1	1	0.356286	NA	-1	NA	1	0.372139	NA	-0.267	-0.5203	0.0074	0.0557133	NA	NA	NA	NA	NA	NA	NA
white matter MD	Right cingulum (hippocampus)	CGH_R	YES	NA	NA	NA	NA	NA	NA	NA	NA	NA	NA	NA	NA	NA	NA	NA	NA	NA	NA	NA	NA	-0.0474	-0.2192	0.1269	0.599762	NA	0.0669	-1	1	0.912032	NA	-1	NA	1	0.731148	NA	-0.0586	-0.3801	0.2561	0.722667	NA	NA	NA	NA	NA	NA	NA
white matter MD	Forceps major	Fmajor	YES	NA	NA	NA	NA	NA	NA	NA	NA	NA	NA	NA	NA	NA	NA	NA	NA	NA	NA	NA	NA	-0.0541	-0.2342	0.1317	0.566236	NA	0.5318	-1	1	0.592991	NA	-0.08	-1	1	0.92704	NA	-0.143	-0.3725	0.1182	0.277898	NA	NA	NA	NA	NA	NA	NA
white matter MD	Forceps minor	Fminor	YES	NA	NA	NA	NA	NA	NA	NA	NA	NA	NA	NA	NA	NA	NA	NA	NA	NA	NA	NA	NA	-0.0884	-0.2604	0.0872	0.32317	NA	-0.5016	-1	NA	0.764816	NA	-0.9805	-1	NA	0.471968	NA	0.0337	-0.2197	0.2948	0.801179	NA	NA	NA	NA	NA	NA	NA
white matter MD	Left inferior fronto-occipital fasciculus	IFOF_L	YES	NA	NA	NA	NA	NA	NA	NA	NA	NA	NA	NA	NA	NA	NA	NA	NA	NA	NA	NA	NA	-0.1143	-0.2802	0.0571	0.188836	NA	0.2634	-1	1	0.89019	NA	-1	NA	1	0.322256	NA	-0.0564	-0.3036	0.1983	0.661887	NA	NA	NA	NA	NA	NA	NA
white matter MD	Right inferior fronto-occipital fasciculus	IFOF_R	YES	NA	NA	NA	NA	NA	NA	NA	NA	NA	NA	NA	NA	NA	NA	NA	NA	NA	NA	NA	NA	-0.0667	-0.2348	0.1043	0.445609	NA	0.1446	-1	1	0.927179	NA	-1	NA	1	0.691405	NA	-0.0557	-0.3233	0.2209	0.702532	NA	NA	NA	NA	NA	NA	NA
white matter MD	Left inferior longitudinal fasciculus	ILF_L	YES	NA	NA	NA	NA	NA	NA	NA	NA	NA	NA	NA	NA	NA	NA	NA	NA	NA	NA	NA	NA	-0.1168	-0.2824	0.0554	0.180694	NA	-0.0565	-1	NA	0.971951	NA	-0.9995	NA	NA	0.628753	NA	-0.0776	-0.3807	0.2216	0.656236	NA	NA	NA	NA	NA	NA	NA
white matter MD	Right inferior longitudinal fasciculus	ILF_R	YES	NA	NA	NA	NA	NA	NA	NA	NA	NA	NA	NA	NA	NA	NA	NA	NA	NA	NA	NA	NA	-0.1191	-0.2836	0.0513	0.16938	NA	-0.069	-1	NA	0.944731	NA	-0.9999	NA	1	0.922602	NA	-0.1345	-0.4148	0.1493	0.366457	NA	NA	NA	NA	NA	NA	NA
white matter MD	Left superior longitudinal fasciculus	SLF_L	YES	NA	NA	NA	NA	NA	NA	NA	NA	NA	NA	NA	NA	NA	NA	NA	NA	NA	NA	NA	NA	-0.0628	-0.2372	0.1155	0.489394	NA	-0.2801	-0.9019	1	0.585613	NA	0.9964	-1	NA	0.908809	NA	0.0439	-0.3109	0.3497	0.81435	NA	NA	NA	NA	NA	NA	NA
white matter MD	Right superior longitudinal fasciculus	SLF_R	YES	NA	NA	NA	NA	NA	NA	NA	NA	NA	NA	NA	NA	NA	NA	NA	NA	NA	NA	NA	NA	0.013	-0.1659	0.1874	0.888788	NA	0.9571	-1	NA	0.915319	NA	-0.778	-1	1	0.718634	NA	0.0501	-0.2145	0.3079	0.711305	NA	NA	NA	NA	NA	NA	NA
white matter MD	Left uncinate fasciculus	UNC_L	YES	NA	NA	NA	NA	NA	NA	NA	NA	NA	NA	NA	NA	NA	NA	NA	NA	NA	NA	NA	NA	-0.1059	-0.2729	0.067	0.227792	NA	-0.3069	-1	1	0.695703	NA	-0.5676	-1	1	0.551116	NA	0.0316	-0.25	0.3146	0.833101	NA	NA	NA	NA	NA	NA	NA
white matter MD	Right uncinate fasciculus	UNC_R	YES	NA	NA	NA	NA	NA	NA	NA	NA	NA	NA	NA	NA	NA	NA	NA	NA	NA	NA	NA	NA	-0.0152	-0.182	0.1528	0.858827	NA	0.0866	-1	1	0.945115	NA	1	-1	NA	0.852034	NA	-0.0475	-0.2774	0.1856	0.6897	NA	NA	NA	NA	NA	NA	NA
white matter MD	Left superior longitudinal fasciculus (temporal part)	SLFtemp_L	YES	NA	NA	NA	NA	NA	NA	NA	NA	NA	NA	NA	NA	NA	NA	NA	NA	NA	NA	NA	NA	-0.1348	-0.3041	0.0441	0.137124	NA	0.3462	-1	NA	0.970012	NA	-0.6346	-1	1	0.838129	NA	-0.1724	-0.45	0.1183	0.24549	NA	NA	NA	NA	NA	NA	NA
white matter MD	Right superior longitudinal fasciculus (temporal part)	SLFtemp_R	YES	NA	NA	NA	NA	NA	NA	NA	NA	NA	NA	NA	NA	NA	NA	NA	NA	NA	NA	NA	NA	-0.0468	-0.2151	0.1253	0.586836	NA	0.0418	-1	NA	0.958577	NA	1	-1	NA	0.704137	NA	-0.1197	-0.3862	0.1818	0.429397	NA	NA	NA	NA	NA	NA	NA
[truncated: 14 more columns]
