# Supplementary material for: Genetics of Externalizing Behavior and Structural Brain Development in Adolescence
Source: Preprints.org preprint supplement (doi:10.20944/preprints202202.0077.v1), 2022-02-04
Supplement: Supplementary file 3 [file SupplementaryDataFileF1.xlsx]

## Sheet: Phenotypic
			Assessment #1: 10 years				Assessment #2: 13 years				Assessment #3: 18 years				Global sex and age effects
Behavioral measure			Distribution				Distribution				Distribution				Sex effect				Age effect
questionnaire	scale	log-transformed	mean	sd	min	max	mean	sd	min	max	mean	sd	min	max	estimate	lower CI	upper CI	p-value	estimate	lower CI	upper CI	p-value
cbcl	externalizing	TRUE	1.39	1	0	3.4	1.22	1	0	3.4	1.03	1	0	3.3	0.04294	-0.1357	0.2222	0.635344	-0.04566	-0.06707	-0.024	5.35497e-05
cbcl	aggression	TRUE	1.29	0.9	0	3.2	1.11	0.9	0	3.2	0.88	0.9	0	3.1	0.02525	-0.1468	0.1971	0.771653	-0.04905	-0.06837	-0.02945	2.45145e-06
cbcl	rulebreaking	TRUE	0.48	0.6	0	2.2	0.44	0.6	0	2.1	0.39	0.6	0	2.4	0.09531	-0.003565	0.1945	0.0585556	-0.0127	-0.02581	0.0004007	0.0564676
cbcl	externalizing	FALSE	5.31	6.1	0	30	4.35	5.1	0	30	3.46	4.9	0	27	0.3649	-0.5813	1.316	0.448087	-0.2256	-0.341	-0.1106	0.000162507
cbcl	aggression	FALSE	4.41	4.9	0	23	3.6	4.3	0	23	2.65	3.8	0	21	0.1577	-0.6185	0.9354	0.68937	-0.2108	-0.2969	-0.1248	3.88364e-06
cbcl	rulebreaking	FALSE	1	1.5	0	8	0.86	1.3	0	7	0.8	1.5	0	10	0.2443	0.0005371	0.4881	0.0494964	-0.02211	-0.05595	0.01157	0.196947
ysr	externalizing	TRUE	–	–	–	–	1.88	0.8	0	3.5	2	0.7	0	3.3	0.2072	0.04917	0.3651	0.00997909	0.02581	0.003495	0.04857	0.0233993
ysr	aggression	TRUE	–	–	–	–	1.5	0.8	0	3	1.39	0.7	0	2.9	0.1029	-0.05101	0.2573	0.189181	0.0004559	-0.0006675	0.001544	0.417066
ysr	rulebreaking	TRUE	–	–	–	–	1.13	0.7	0	2.6	1.37	0.6	0	2.8	0.2981	0.1696	0.4266	7.61671e-06	0.05783	0.03831	0.07768	1.75695e-08
ysr	externalizing	FALSE	–	–	–	–	7.57	6	0	32	7.64	5.3	0	27	1.801	0.606	2.998	0.00320987	0.1319	-0.03676	0.3058	0.127148
ysr	aggression	FALSE	–	–	–	–	4.79	4	0	20	4.02	3.3	0	18	0.5345	-0.2298	1.299	0.168647	0.001826	-0.004238	0.007806	0.555192
ysr	rulebreaking	FALSE	–	–	–	–	2.78	2.4	0	12	3.72	2.8	0	15	1.258	0.7661	1.749	8.10528e-07	0.2407	0.163	0.3198	3.56672e-09

## Sheet: Heritabilities
			Assessment #1: 10 years												Assessment #2: 13 years												Assessment #3: 18 years
Behavioral measure			Heritability				Common environment				Unique environment				Heritability				Common environment				Unique environment				Heritability				Common environment				Unique environment
questionnaire	scale	log-transformed	estimate	lower CI	upper CI	p-value	estimate	lower CI	upper CI	p-value	estimate	lower CI	upper CI	p-value	estimate	lower CI	upper CI	p-value	estimate	lower CI	upper CI	p-value	estimate	lower CI	upper CI	p-value	estimate	lower CI	upper CI	p-value	estimate	lower CI	upper CI	p-value	estimate	lower CI	upper CI	p-value
cbcl	externalizing	TRUE	0.7953	0.5748	0.9247	4.01609e-08	0.0877	0	0.2893	0.23702	0.117	0.071	0.2106	–	0.8803	0.704	0.9649	1.59894e-12	0.0694	0	0.2483	0.23702	0.0504	0.0331	0.0802	–	0.8183	0.6334	0.9079	6.80491e-09	0.0469	0	0.2202	0.23702	0.1348	0.0868	0.2172	–
cbcl	aggression	TRUE	0.8229	0.5881	0.9114	2.27618e-08	0.0369	0	0.2453	0.38311	0.1402	0.0878	0.2369	–	0.8824	0.7002	0.9413	2.78154e-10	0.0288	0	0.2078	0.38311	0.0888	0.0582	0.1428	–	0.834	0.685	0.9007	3.78556e-09	0.0082	0	0.1356	0.38311	0.1577	0.0983	0.2619	–
cbcl	rulebreaking	TRUE	0.5997	0.2112	0.803	0.00206073	0.1143	0	0.3639	0.0874866	0.286	0.1715	0.4787	–	0.7974	0.6342	0.9287	7.49481e-09	0.1193	0	0.2809	0.064152	0.0833	0.0532	0.1411	–	0.5523	0.241	0.7878	0.000370464	0.1824	0	0.4089	0.064152	0.2653	0.1695	0.417	–
cbcl	externalizing	FALSE	0.4302	0.1136	0.7139	0.000241731	0.266	0.0313	0.4959	0.0307511	0.3038	0.1861	0.4719	–	0.7469	0.5682	0.8924	2.0005e-07	0.1463	0.0073	0.3161	0.0308312	0.1068	0.0679	0.1773	–	0.6194	0.3863	0.7512	2.16113e-05	0.04	0.0001	0.2151	0.155574	0.3405	0.2273	0.4913	–
cbcl	aggression	FALSE	0.5588	0.2487	0.7823	0.000171608	0.1736	0	0.3825	0.0543863	0.2676	0.1661	0.432	–	0.682	0.4546	0.8565	4.47439e-06	0.1484	0	0.3313	0.0543863	0.1696	0.1093	0.2725	–	0.5773	0.3832	0.7081	2.10588e-05	0.0114	0	0.1468	0.286097	0.4113	0.2782	0.5778	–
cbcl	rulebreaking	FALSE	0.3432	0.0272	0.6884	0.00464544	0.1835	0	0.4364	0.105548	0.4733	0.2871	0.6748	–	0.8122	0.6593	0.9231	1.19146e-07	0.085	0	0.2278	0.0986809	0.1028	0.0605	0.1982	–	0.4969	0.1366	0.7411	0.000332735	0.1406	0	0.408	0.108975	0.3625	0.234	0.5348	–
ysr	externalizing	TRUE	–	–	–	–	–	–	–	–	–	–	–	–	0.7644	0.583	0.8568	4.32296e-05	0	0	0.0963	0.5	0.2356	0.1432	0.402	–	0.417	0.1502	0.5947	0.000356302	0	0	0.1802	0.5	0.583	0.4053	0.796	–
ysr	aggression	TRUE	–	–	–	–	–	–	–	–	–	–	–	–	0.6956	0.5019	0.8102	7.54189e-05	0	0	0.0999	0.492654	0.3044	0.1899	0.4848	–	0.2512	0.0761	0.4483	0.000911961	0.0214	0	0.1847	0.454038	0.7274	0.5512	0.8801	–
ysr	rulebreaking	TRUE	–	–	–	–	–	–	–	–	–	–	–	–	0.7146	0.5168	0.8236	0.000114213	0	0	0.0993	0.49999	0.2854	0.1764	0.4646	–	0.4725	0.1672	0.638	0.00113471	0	0	0.169	0.499995	0.5275	0.362	0.736	–
ysr	externalizing	FALSE	–	–	–	–	–	–	–	–	–	–	–	–	0.6572	0.4535	0.7904	0.000849104	0	0	0.135	0.5	0.3428	0.2096	0.5465	–	0.3031	0.0761	0.5271	0.00862035	0	0	0.1737	0.5	0.6969	0.4729	0.9239	–
ysr	aggression	FALSE	–	–	–	–	–	–	–	–	–	–	–	–	0.6495	0.4131	0.7797	0.00042588	0.0027	0	0.1346	0.404804	0.3478	0.2198	0.5398	–	0.1769	0.0208	0.3761	0.00958469	0.0443	0	0.1923	0.34067	0.7788	0.599	0.9414	–
ysr	rulebreaking	FALSE	–	–	–	–	–	–	–	–	–	–	–	–	0.6571	0.4682	0.7847	0.000816348	0	0	0.1279	0.499991	0.3429	0.2153	0.5318	–	0.4522	0.2488	0.6201	0.0055235	0	0	0.1775	0.499995	0.5478	0.3799	0.7512	–

## Sheet: Associations
			Assessment #1 to #2: 10 to 13 years																				Assessment #2 to #3: 13 to 18 years																				Assessment #1 to #3: 10 to 18 years
Behavioral measure			Phenotypic association					Genetic association					Common environment association					Unique environment association					Phenotypic association					Genetic association					Common environment association					Unique environment association					Phenotypic association					Genetic association
questionnaire	scale	log-transformed	estimate	lower CI	upper CI	p-value (0)	p-value (1)	estimate	lower CI	upper CI	p-value (0)	p-value (1)	estimate	lower CI	upper CI	p-value (0)	p-value (1)	estimate	lower CI	upper CI	p-value (0)	p-value (1)	estimate	lower CI	upper CI	p-value (0)	p-value (1)	estimate	lower CI	upper CI	p-value (0)	p-value (1)	estimate	lower CI	upper CI	p-value (0)	p-value (1)	estimate	lower CI	upper CI	p-value (0)	p-value (1)	estimate	lower CI	upper CI	p-value (0)	p-value (1)	estimate	lower CI
cbcl	externalizing	TRUE	0.6337	0.5249	0.7228	8.19606e-16	1.01854e-29	0.6246	0.6241	0.7572	3.16465e-07	0.000398974	1	-1	1	0.47404	0.999987	0.4317	-0.0302	0.7086	0.0645604	4.17261e-11	0.5806	0.4667	0.6755	1.06582e-13	4.91304e-35	0.5869	0.4984	0.7097	8.80876e-08	3.22743e-05	1	-1	1	0.47404	0.999947	0.3092	-0.0291	0.5822	0.072145	3.98398e-16	0.5137	0.3842	0.6252	7.36608e-11	7.70146e-38	0.5324	0.4475
cbcl	aggression	TRUE	0.6389	0.536	0.7236	5.32797e-17	4.40994e-31	0.6634	0.6352	0.7903	1.15736e-06	0.000173327	1	-1	1	0.76622	1	0.3679	-0.0307	0.6503	0.0679005	4.63798e-14	0.6185	0.515	0.7033	9.24157e-16	3.05746e-34	0.679	0.679	0.8196	4.34525e-08	0.00213094	1	-1	1	0.766221	0.999961	0.1738	-0.1799	0.4924	0.334245	6.81336e-19	0.5275	0.4029	0.6329	8.85696e-11	3.57557e-39	0.6087	0.5403
cbcl	rulebreaking	TRUE	0.541	0.4078	0.6509	1.66255e-10	1.30096e-36	0.5212	0.5212	0.8402	0.00431792	0.0354293	1	0.8373	1	0.174973	0.999982	0.413	-0.033	0.7042	0.0669681	6.73737e-14	0.4393	0.2905	0.5676	7.78285e-07	5.70293e-41	0.4403	0.4403	0.7629	0.00337286	0.0202234	1	-1	1	0.128304	1	-0.0032	-0.3691	0.3572	0.986957	5.42014e-29	0.4489	0.3066	0.5711	4.28679e-07	9.82029e-42	0.3768	0.3768
cbcl	externalizing	FALSE	0.6168	0.5037	0.7068	3.60197e-14	8.33535e-33	0.7399	0.4377	1	0.000769682	0.190735	1	-1	1	0.0616623	0.999965	0.0007	-0.3791	0.4376	0.997653	2.00484e-22	0.6212	0.5134	0.7085	3.01673e-14	1.44049e-33	0.717	0.5158	0.937	5.16452e-05	0.0467551	1	-1	1	0.311178	0.999927	0.2989	-0.0375	0.5777	0.0821654	1.41906e-20	0.4724	0.3353	0.5874	4.912e-08	1.25602e-41	0.6887	0.2348
cbcl	aggression	FALSE	0.6179	0.5123	0.7039	5.53779e-16	5.31609e-05	0.6618	0.3849	0.916	0.0013678	0.0141556	1	NA	1	0.108773	1	0.2294	-0.1297	0.5575	0.218853	1.37236e-21	0.6343	0.5374	0.7138	1.02893e-16	1.26692e-34	0.8747	0.639	1	5.16856e-05	0.566068	1	-1	1	0.572208	1	0.1676	-0.143	0.4705	0.322868	1.52228e-27	0.485	0.3562	0.5953	6.56261e-09	4.72857e-42	0.7897	0.4469
cbcl	rulebreaking	FALSE	0.5144	0.3701	0.6271	8.48679e-08	5.44466e-06	0.6999	0.6999	1	0.00929094	0.331544	1	-1	1	0.211096	1	0.0904	-0.3179	0.5168	0.692413	9.54512e-20	0.4324	0.2786	0.5605	4.38101e-06	2.29245e-42	0.5516	0.5516	1	0.00180739	0.108818	1	-1	1	0.218128	1	-0.1419	-0.4734	0.2587	0.489877	6.39808e-30	0.4178	0.2667	0.5468	8.33802e-06	3.10332e-30	0.1813	0.1813
ysr	externalizing	TRUE	–	–	–	–	–	–	–	–	–	–	–	–	–	–	–	–	–	–	–	–	0.4556	0.3218	0.5687	5.19863e-09	3.1322e-45	0.8609	0.5742	1	0.000712604	0.484212	0.5813	-1	NA	0.99999	0.999978	-0.0822	-0.3971	0.2614	0.642773	1.71149e-43	–	–	–	–	–	–	–
ysr	aggression	TRUE	–	–	–	–	–	–	–	–	–	–	–	–	–	–	–	–	–	–	–	–	0.437	0.3018	0.5521	2.30169e-08	1.30615e-46	0.9821	0.9513	NA	0.00182392	0.974702	-0.9961	NA	NA	0.985309	0.985309	0.0574	-0.2084	0.329	0.686948	9.24537e-50	–	–	–	–	–	–	–
ysr	rulebreaking	TRUE	–	–	–	–	–	–	–	–	–	–	–	–	–	–	–	–	–	–	–	–	0.3507	0.2137	0.4735	2.06455e-06	3.54526e-51	0.687	0.3847	1	0.00245146	0.163357	0.0694	-1	1	0.999948	0.999971	-0.1251	-0.4342	0.2183	0.479456	4.48971e-44	–	–	–	–	–	–	–
ysr	externalizing	FALSE	–	–	–	–	–	–	–	–	–	–	–	–	–	–	–	–	–	–	–	–	0.4287	0.2964	0.5428	1.73386e-07	2.12722e-48	0.8094	0.3886	1	0.017241	0.704949	0.2613	-0.892	NA	1	1	0.138	-0.2328	0.4546	0.504251	2.74911e-32	–	–	–	–	–	–	–
ysr	aggression	FALSE	–	–	–	–	–	–	–	–	–	–	–	–	–	–	–	–	–	–	–	–	0.4171	0.2784	0.5363	1.05806e-07	8.15335e-18	1	0.948	NA	0.0191693	1	-1	NA	1	0.809608	0.809601	0.171	-0.1475	0.4669	0.298294	1.6812e-41	–	–	–	–	–	–	–
ysr	rulebreaking	FALSE	–	–	–	–	–	–	–	–	–	–	–	–	–	–	–	–	–	–	–	–	0.2913	0.1527	0.4186	0.000772376	1.84292e-25	0.583	0.2464	0.9012	0.0163557	0.102053	-0.3164	-1	1	0.999996	0.999796	-0.061	-0.3676	0.2576	0.715082	2.59065e-47	–	–	–	–	–	–	–
[truncated: 13 more columns]

## Sheet: Heritabilities of change scores
			Assessment #1 to #2: 10 to 13 years												Assessment #2 to #3: 13 to 18 years												Assessment #1 to #3: 10 to 18 years
Behavioral measure			Heritability				Common environment				Unique environment				Heritability				Common environment				Unique environment				Heritability				Common environment				Unique environment
questionnaire	scale	log-transformed	estimate	lower CI	upper CI	p-value	estimate	lower CI	upper CI	p-value	estimate	lower CI	upper CI	p-value	estimate	lower CI	upper CI	p-value	estimate	lower CI	upper CI	p-value	estimate	lower CI	upper CI	p-value	estimate	lower CI	upper CI	p-value	estimate	lower CI	upper CI	p-value	estimate	lower CI	upper CI	p-value
cbcl	externalizing	TRUE	0.8629	0.7026	0.9249	8.51405e-06	0.001	NA	0.0739	0.477367	0.1361	0.075	0.2924	0.00111713	0.8396	0.6928	0.9008	2.10701e-06	0.0035	NA	0.126	0.49462	0.1569	0.0981	0.2596	3.92529e-06	0.7756	0.5499	0.876	0.000411706	0.007	NA	0.124	0.477636	0.2175	0.1226	0.3776	4.09957e-07
cbcl	aggression	TRUE	0.7984	0.611	0.8846	4.86398e-05	0.0004	NA	0.0876	0.489923	0.2012	0.1154	0.3813	3.13295e-07	0.7252	0.481	0.8357	0.000583478	0.0091	NA	0.1658	0.464863	0.2657	0.1632	0.4348	9.24058e-11	0.6861	0.3904	0.8264	0.00327413	0.011	NA	0.1591	0.446891	0.3029	0.1728	0.5355	3.86654e-10
cbcl	rulebreaking	TRUE	0.7218	0.4733	0.8475	0.00102787	0.0003	NA	0.1406	0.488856	0.2779	0.1517	0.5067	1.51057e-08	0.6818	0.4146	0.8187	0.000843066	0.0061	NA	0.1131	0.382392	0.3121	0.1807	0.542	5.17656e-11	0.6541	0.3583	0.7919	0.0155483	0.0037	NA	0.1831	0.495045	0.3422	0.2065	0.5678	1.18369e-12
cbcl	externalizing	FALSE	0.3769	0.0346	0.6632	0.0703872	0.0569	0	0.2386	0.301115	0.5663	0.317	0.8528	9.51036e-17	0.5192	0.2096	0.7051	0.013242	0.0464	0	0.2255	0.390929	0.4344	0.2699	0.6606	3.75256e-17	0.2941	0	0.5837	0.148423	0.1367	0	0.3918	0.202969	0.5692	0.3727	0.8079	1.88635e-21
cbcl	aggression	FALSE	0.5343	0.2317	0.7339	0.0096041	0.0096	NA	0.1286	0.453935	0.4561	0.2632	0.7209	1.75946e-15	0.2405	0.0004	0.5364	0.187271	0.124	0	0.3192	0.218409	0.6355	0.4184	0.8587	5.1656e-23	0.2455	0	0.5428	0.137126	0.1288	0	0.3328	0.195281	0.6257	0.4204	0.8431	2.71665e-26
cbcl	rulebreaking	FALSE	0.355	0.0574	0.6718	0.0584452	0.0387	0	0.2129	0.416953	0.6063	0.3261	0.8586	4.37668e-13	0.501	0.1311	0.7283	0.0264874	0.0142	NA	0.1792	0.485644	0.4847	0.2718	0.7702	1.82562e-14	0.5886	0.0041	0.7566	0.0676081	0.0037	NA	0.3608	0.448518	0.4077	0.2436	0.6644	4.46326e-14
ysr	externalizing	TRUE	–	–	–	–	–	–	–	–	–	–	–	–	0.2607	0.052	0.469	0.0603109	0	NA	0.168	0.499963	0.7393	0.531	0.9383	4.84734e-30	–	–	–	–	–	–	–	–	–	–	–	–
ysr	aggression	TRUE	–	–	–	–	–	–	–	–	–	–	–	–	0.1593	0.0317	0.3889	0.0888645	0.0178	NA	0.1542	0.454038	0.8229	0.6099	0.9619	1.41935e-35	–	–	–	–	–	–	–	–	–	–	–	–
ysr	rulebreaking	TRUE	–	–	–	–	–	–	–	–	–	–	–	–	0.3097	0.0214	0.5034	0.0660816	0	NA	0.1756	0.499985	0.6903	0.4966	0.8974	2.98096e-30	–	–	–	–	–	–	–	–	–	–	–	–
ysr	externalizing	FALSE	–	–	–	–	–	–	–	–	–	–	–	–	0.2551	0.0505	0.4783	0.110781	0	NA	0.2173	0.499968	0.7449	0.5217	0.9495	6.26025e-27	–	–	–	–	–	–	–	–	–	–	–	–
ysr	aggression	FALSE	–	–	–	–	–	–	–	–	–	–	–	–	0.2315	0.0469	0.4516	0.0390086	0.0493	NA	0.208	0.34067	0.7193	0.5205	0.9046	3.82023e-29	–	–	–	–	–	–	–	–	–	–	–	–
ysr	rulebreaking	FALSE	–	–	–	–	–	–	–	–	–	–	–	–	0.3172	0.112	0.5085	0.0523474	0	NA	0.175	0.499973	0.6828	0.4915	0.888	2.69526e-31	–	–	–	–	–	–	–	–	–	–	–	–
