# Supplementary material for: Genetics of Externalizing Behavior and Structural Brain Development in Adolescence
Source: Preprints.org preprint supplement (doi:10.20944/preprints202202.0077.v1), 2022-02-04
Supplement: Supplementary file 4 [file SupplementaryDataFileF2.xlsx]

## Sheet: Phenotypic
				Assessment #1: 10 years				Assessment #2: 13 years				Assessment #3: 18 years				Global sex and age effects
Brain measure				Distribution				Distribution				Distribution				Sex effect				Age effect				Age^2 effect				Global brain effect
atlas	region	abbreviation	correct global brain	mean	sd	min	max	mean	sd	min	max	mean	sd	min	max	estimate	lower CI	upper CI	p-value	estimate	lower CI	upper CI	p-value	estimate	lower CI	upper CI	p-value	estimate	lower CI	upper CI	p-value
global	Total brain volume	TBV	NO	1200000	102000	943000	1470000	1220000	112000	927000	1540000	1200000	119000	941000	1540000	0.1143	0.09414	0.1346	9.96226e-24	0.02577	0.02103	0.03049	0.716903	-0.0008897	-0.001052	-0.0007264	6.73082e-23	–	–	–	–
global	Global white matter mean fractional anisotropy	GFA	NO	0.43	0.0145	0.384	0.475	0.437	0.0131	0.408	0.469	0.431	0.0134	0.394	0.468	-0.003627	-0.006516	-0.0007305	0.013913	0.005647	0.003957	0.007337	0.015112	-0.0001906	-0.0002513	-0.0001314	1.14396e-09	–	–	–	–
global	Global white matter mean diffusivity	GMD	NO	0.763	0.0205	0.709	0.821	0.761	0.0166	0.716	0.81	0.771	0.0207	0.711	0.832	0.005168	0.001342	0.008989	0.00792439	-0.004232	-0.006472	-0.001958	0.000487094	0.0001777	9.7e-05	0.0002557	2.01487e-05	–	–	–	–
global	Total cortical gray matter volume	CGM	YES; TBV	539000	50600	407000	664000	530000	55400	393000	661000	499000	53100	363000	625000	-0.05825	-0.1102	-0.007736	0.0249564	-0.04782	-0.08079	-0.01467	2.25589e-55	-0.0002112	-0.001369	0.0009376	0.71982	0.5192	0.4909	0.5485	2.73032e-163
global	Total subcortical gray matter volume	SGM	YES; TBV	61300	4500	51900	74500	61800	4600	52100	73600	61400	5020	49700	75600	0.1559	0.0886	0.225	4.64846e-06	0.06221	0.03855	0.08549	0.795678	-0.002181	-0.002995	-0.001354	4.40651e-07	0.2815	0.2457	0.3164	3.75487e-43
global	Total cortical white matter volume	WMV	YES; TBV	444000	47800	323000	578000	469000	51700	334000	623000	488000	58400	334000	660000	0.05897	0.009332	0.1097	0.0193907	0.1355	0.1082	0.1623	8.90015e-52	-0.002911	-0.003845	-0.001957	9.20709e-09	0.412	0.3804	0.4425	7.33221e-85
subcortical	Left putamen	PUT_L	YES; TBV	5620	618	4020	7370	5580	611	4280	7440	5460	685	3670	7220	0.2227	0.1042	0.3429	0.000222769	0.01558	-0.02815	0.05881	1.26011e-13	-0.001378	-0.00289	0.0001376	0.075059	0.2536	0.1958	0.3111	9.32672e-17
subcortical	Left hippocampus	HIP_L	YES; TBV	4440	404	3390	5700	4560	449	3530	5850	4620	474	3370	5810	0.02166	-0.06305	0.1072	0.616602	0.1119	0.07645	0.1469	3.43453e-12	-0.003205	-0.004445	-0.00196	1.31642e-06	0.2234	0.1802	0.2665	6.97219e-22
subcortical	Left amygdala	AMY_L	YES; TBV	1490	161	1090	1910	1520	162	1160	1890	1550	182	1110	2110	0.03195	0.0005753	0.06186	0.0450141	0.03013	0.01547	0.04474	4.77152e-11	-0.0008126	-0.001326	-0.0002977	0.00209313	0.09301	0.07687	0.109	1.6988e-25
subcortical	Right putamen	PUT_R	YES; TBV	5500	606	3900	7240	5380	604	3710	7160	5220	635	3560	7100	0.2749	0.1593	0.3936	2.63072e-06	-0.06179	-0.0994	-0.02455	9.29156e-28	0.0008608	-0.000446	0.00218	0.196883	0.2093	0.1538	0.2642	8.48331e-13
subcortical	Right hippocampus	HIP_R	YES; TBV	4320	403	3290	5540	4450	410	3490	5740	4510	462	3340	5870	0.04056	-0.0433	0.1253	0.34075	0.08551	0.05372	0.1172	1.88534e-13	-0.00232	-0.003428	-0.001204	5.64404e-05	0.2321	0.1901	0.274	2.40646e-24
subcortical	Right amygdala	AMY_R	YES; TBV	1540	173	1170	2050	1580	181	1220	2080	1610	192	1190	2220	0.03579	-0.0002527	0.07178	0.050229	0.04358	0.02754	NA	1.29663e-09	-0.001242	NA	NA	1.50348e-05	0.1011	0.08298	0.1191	1.18195e-24
temporal cortex	Left banks of superior temporal gyrus	Bank_L	YES; TBV	3090	564	1780	4780	3000	590	1680	4630	2810	520	1680	4230	0.3992	0.2866	0.5113	1.39033e-11	0.06871	0.02165	0.1156	3.32848e-20	-0.003564	-0.005206	-0.001926	2.34296e-05	0.0001718	NA	NA	0.61701
anterior cingulum	Left caudal anterior cingulate cortex	ACc_L	YES; TBV	1970	466	869	3360	1980	516	1040	3640	1920	466	769	3350	0.07258	-0.0335	0.1782	0.177161	0.009405	-0.0188	0.03772	0.000218358	-0.0005556	-0.001552	0.0004357	0.270212	-0.0003193	NA	NA	0.176495
frontal cortex	Left caudal middle frontal gyrus	cMFG_L	YES; TBV	7700	1330	3770	11700	7760	1330	4600	11700	7250	1230	4810	10600	0.5694	0.2984	0.8421	4.75245e-05	0.1592	0.05381	0.2644	3.05753e-13	-0.007872	-0.01157	-0.00417	3.69859e-05	-0.001435	-0.002726	-0.000114	0.0351025
temporal cortex	Left entorhinal gyrus	Ent_L	YES; TBV	1980	458	914	3350	2020	473	575	3080	2070	382	988	3110	0.2685	0.1888	0.348	2.01458e-10	0.04777	-0.0009562	0.09638	0.000809724	-0.001334	-0.003025	0.0003625	0.122719	-0.0005483	NA	0.0001981	0.149319
temporal cortex	Left fusiform gyrus	FG_L	YES; TBV	11300	1590	6720	15800	11100	1510	6690	15300	10500	1550	6400	14600	0.1309	0.1003	0.1614	1.27787e-15	0.002852	-0.01157	NA	2.92408e-17	-0.0004366	-0.0009422	6.89e-05	0.0886625	-9.664e-05	NA	NA	0.29941
temporal cortex	Left inferior temporal gyrus	ITG_L	YES; TBV	11700	1790	7070	17000	11600	1810	7120	15900	11000	1740	6420	16200	0.1298	0.09412	0.1655	6.79319e-12	0.01475	0.001031	0.02851	6.46268e-17	-0.0008621	-0.001345	-0.0003821	0.000466015	-0.0002817	-0.000466	-9.682e-05	0.00311538
frontal cortex	Left lateral orbitofrontal gyrus	lOFG_L	YES; TBV	8070	1120	4940	10800	8010	1230	4550	11000	7670	1070	5050	10700	0.7396	0.5431	0.9348	1.52428e-12	0.1586	0.03855	0.2793	1.99222e-10	-0.007256	-0.01141	-0.003135	0.000587437	-0.0009555	-0.002606	0.0006716	0.249611
frontal cortex	Left medial orbitofrontal gyrus	mOFG_L	YES; TBV	5550	868	3530	8210	5380	896	3120	7550	5220	810	3450	7380	0.68	0.5285	0.8325	7.65065e-17	-0.06563	-0.1694	0.03801	9.33584e-10	0.0008575	-0.002627	0.001197	0.641104	0.0003339	-0.0009601	0.001618	0.609768
temporal cortex	Left middle temporal gyrus	MTG_L	YES; TBV	12400	1670	7880	17400	12400	1780	7610	17100	11700	1590	7610	15700	0.1555	0.124	0.1869	1.61267e-19	0.01571	0.001743	0.02963	1.56127e-14	-0.0008837	-0.001365	-0.0004033	0.000321729	-0.0001133	-0.0002885	NA	0.20617
temporal cortex	Left parahippocampal gyrus	Par_L	YES; TBV	2330	364	1370	3550	2320	376	1200	3440	2260	322	1540	3070	0.1956	0.1263	0.2646	6.66104e-08	0.009851	-0.0248	0.04454	0.000168519	-0.0006584	-0.001885	0.0005621	0.28913	-0.0001523	NA	NA	0.46175
frontal cortex	Left pars opercularis	Opr_L	YES; TBV	5910	938	3640	8700	5910	960	3860	8160	5510	891	3280	8320	0.4895	0.2907	0.6882	1.93656e-06	0.1212	0.04669	0.1956	9.30406e-19	-0.006094	-0.008656	-0.003519	4.96907e-06	-0.0002292	NA	NA	0.64422
frontal cortex	Left pars orbitalis	Orb_L	YES; TBV	2710	460	1410	3870	2650	452	1630	3840	2510	438	1400	3620	0.1895	0.09745	0.281	5.98108e-05	0.03781	NA	0.08566	2.18884e-12	-0.002207	-0.003869	-0.0005624	0.00883704	-3.504e-05	NA	NA	0.91177
frontal cortex	Left pars triangularis	Tri_L	YES; TBV	4480	739	2660	6820	4380	748	2610	6450	4100	715	2390	6190	0.4255	0.2652	0.5856	3.11026e-07	0.0779	0.01982	0.1358	2.3416e-24	-0.004508	-0.006541	-0.002476	1.59119e-05	4.837e-05	NA	NA	0.898132
anterior cingulum	Left rostral anterior cingulate gyrus	ACr_L	YES; TBV	2830	618	1130	4600	2850	613	1300	4590	2770	583	1410	4490	0.1557	0.03208	0.2789	0.0132719	0.05123	0.001507	0.101	0.0242986	-0.002038	-0.003762	-0.0003162	0.020368	0.0001442	NA	0.0008397	0.681617
frontal cortex	Left rostral middle frontal gyrus	rMFG_L	YES; TBV	19900	2890	12300	28200	19400	3040	11600	26500	17900	2730	11300	26000	0.2572	0.2063	0.308	2.23829e-20	0.02343	-0.001845	0.04873	1.02605e-29	-0.001733	-0.002603	-0.0008727	8.61275e-05	-0.0004454	NA	NA	0.00834052
frontal cortex	Left superior frontal gyrus	SFG_L	YES; TBV	27200	3150	18000	35900	27100	3350	17800	35100	25500	3080	17400	34200	-0.09188	-0.1437	-0.04093	0.000379211	0.003362	-0.01958	0.02654	5.30677e-27	-0.0009264	-0.001744	-0.0001221	0.0238272	0.2781	0.2519	0.3048	1.79997e-75
temporal cortex	Left superior temporal gyrus	STG_L	YES; TBV	14000	1790	9560	18600	13700	1860	9120	18600	13100	1790	8710	17600	0.1375	0.1029	0.1719	7.80584e-14	0.00662	-0.008217	0.02132	2.79872e-17	-0.0006	-0.001104	-9.034e-05	0.0214756	-0.000348	-0.0005115	-0.0001794	0.000110977
frontal cortex	Left frontal pole	FP_L	YES; TBV	1040	246	450	1700	970	227	490	1500	916	192	418	1440	0.6801	0.2886	1.072	0.000693091	-0.4766	-0.793	NA	7.88098e-11	0.01151	NA	NA	0.0400033	0.00279	-0.001183	0.00676	0.168863
temporal cortex	Left temporal pole	TP_L	YES; TBV	2860	486	1420	4130	2860	465	1490	4090	2870	406	1870	3820	0.1213	0.03366	0.2093	0.00671958	0.05271	-0.006999	0.07616	0.693248	-0.00187	-0.003894	-0.001408	0.0712821	-0.000752	-0.001575	4.149e-05	0.0639943
temporal cortex	Left transverse temporal gyrus	TTG_L	YES; TBV	1300	250	734	2070	1270	238	714	1920	1220	239	696	1910	0.09283	0.04106	0.1447	0.000493983	0.009522	-0.007537	0.02648	6.77771e-14	-0.0006799	-0.001283	-7.678e-05	0.0269152	6.012e-05	NA	NA	0.602282
insular cortex	Left insula	Ins_L	YES; TBV	7340	800	5040	9590	7390	866	4890	9510	7270	897	5380	10000	0.5181	0.3684	0.6681	5.901e-11	0.1759	0.09495	0.2571	0.19842	-0.006584	-0.009475	-0.003706	8.21746e-06	-0.000433	-0.001499	0.0006234	0.42207
temporal cortex	Right banks of superior temporal gyrus	Bank_R	YES; TBV	2820	485	1560	4120	2770	481	1690	4260	2620	436	1790	3780	0.08277	-0.02592	0.1898	0.132113	-0.02113	-0.05935	0.01728	1.35333e-15	-0.0001779	-0.001505	0.00114	0.79119	0.237	0.1862	0.2886	1.18044e-19
anterior cingulum	Right caudal anterior cingulate cortex	ACc_R	YES; TBV	2340	567	1110	3800	2330	611	1080	4100	2280	537	1000	3610	-0.2968	-0.4316	-0.1619	1.65399e-05	-0.02707	-0.06001	0.005784	3.53488e-06	0.0005878	-0.0005571	0.001734	0.312603	0.2864	0.2313	0.3414	2.76889e-23
frontal cortex	Right caudal middle frontal gyrus	cMFG_R	YES; TBV	7220	1350	4150	10600	7200	1290	3750	10600	6770	1270	3950	10200	-0.6076	-0.899	-0.3183	3.95801e-05	0.0314	-0.05911	0.1224	7.68243e-17	-0.003136	NA	NA	0.0546047	0.9307	0.8002	1.062	1.14428e-39
temporal cortex	Right entorhinal gyrus	Ent_R	YES; TBV	1830	457	525	3290	1860	404	994	2950	1860	433	846	3300	-0.002222	-0.0962	0.09228	0.962943	0.02401	-0.02695	0.0751	0.46465	-0.0007645	NA	NA	0.397309	0.2065	0.1587	0.2548	3.75982e-16
temporal cortex	Right fusiform gyrus	FG_R	YES; TBV	10700	1550	6550	14700	10500	1530	6820	14900	9930	1410	6260	13300	-0.005954	-0.03498	0.02252	0.681909	-0.02013	-0.03273	-0.00747	1.45268e-22	0.0003592	-7.998e-05	0.0007957	0.107113	0.1161	0.1015	0.1312	2.79723e-50
temporal cortex	Right inferior temporal gyrus	ITG_R	YES; TBV	11000	1710	6010	15500	11000	1730	7370	15000	10500	1650	6990	15100	-0.05191	-0.08435	-0.02023	0.00130583	-0.002138	-0.01412	0.009877	4.26077e-18	-0.0001968	-0.0006116	0.0002182	0.351797	0.146	0.1304	0.162	6.26311e-65
frontal cortex	Right lateral orbitofrontal gyrus	lOFG_R	YES; TBV	7820	1170	4590	11100	7890	1180	4840	10600	7500	1070	5130	10700	-0.285	-0.4867	-0.08635	0.00493584	0.0319	-0.07945	0.1458	1.821e-08	-0.002697	-0.006616	0.00116	0.171094	0.9127	0.8083	1.02	8.29728e-56
frontal cortex	Right medial orbitofrontal gyrus	mOFG_R	YES; TBV	5200	797	3480	7540	5090	794	3440	7300	4840	706	3330	6940	-0.0009087	-0.155	0.1521	0.990704	-0.03454	NA	0.05018	2.65498e-14	-0.0004134	NA	NA	0.781124	0.4423	0.3654	0.5209	4.20617e-27
temporal cortex	Right middle temporal gyrus	MTG_R	YES; TBV	14000	1790	9260	19600	14000	1960	9440	19600	13300	1810	8900	18500	-0.02185	-0.05643	0.01227	0.207508	-0.001475	-0.01486	0.01202	1.60713e-23	-0.0003369	-0.0008052	0.0001234	0.151975	0.1585	0.1407	0.1767	5.96146e-61
temporal cortex	Right parahippocampal gyrus	Par_R	YES; TBV	2190	338	1300	3270	2200	317	1470	3100	2140	329	1500	3300	0.03087	-0.03898	0.1008	0.384264	0.001441	-0.02925	0.03267	0.00117471	-0.0003116	-0.001401	0.0007664	0.571432	0.1709	0.136	0.2059	1.55944e-20
frontal cortex	Right pars opercularis	Opr_R	YES; TBV	4810	848	2290	7440	4870	848	3390	7040	4540	845	2600	7060	0.0155	-0.1797	0.2084	0.874665	0.04625	-0.007032	0.09949	3.34182e-18	-0.002879	-0.004744	-0.001009	0.00267447	0.4627	0.379	0.5474	2.33888e-26
frontal cortex	Right pars orbitalis	Orb_R	YES; TBV	3260	493	1930	4730	3250	505	2090	4600	2990	481	1990	4340	-0.03834	-0.1462	0.0682	0.480401	0.03003	-0.0204	0.08053	8.50752e-20	-0.002323	-0.00407	-0.0005775	0.00945758	0.289	0.2369	0.3421	4.03861e-25
frontal cortex	Right pars triangularis	Tri_R	YES; TBV	5160	939	2740	7910	5090	986	2790	7730	4740	942	2710	7460	-0.06846	-0.2856	0.1466	0.531778	-0.00561	-0.07469	0.063	2.91405e-20	-0.001844	-0.004239	0.0005406	0.130059	0.5006	0.406	0.5961	8.33843e-24
anterior cingulum	Right rostral anterior cingulate gyrus	ACr_R	YES; TBV	2170	550	787	3690	2160	551	847	3520	2180	500	917	3640	-0.2474	-0.3664	-0.1318	4.1512e-05	0.004273	-0.03578	0.0444	0.276209	-0.0002468	NA	0.001142	0.727337	0.3153	0.2622	0.3684	8.57422e-28
frontal cortex	Right rostral middle frontal gyrus	rMFG_R	YES; TBV	20400	2860	12200	28700	20000	3140	12200	27800	18400	2800	12200	26100	-0.02985	-0.07917	0.01855	0.226011	-0.00485	-0.02283	0.01326	1.9936e-46	-0.0008277	-0.001453	-0.000209	0.00853354	0.2522	0.2286	0.2764	1.22678e-79
frontal cortex	Right superior frontal gyrus	SFG_R	YES; TBV	26600	3030	18400	35300	26500	3210	18200	34200	25000	3100	16500	32800	-0.1014	-0.1517	-0.05178	5.78212e-05	0.02164	-0.0006973	0.04391	3.93216e-31	-0.001584	-0.002359	-0.0008054	7.28863e-05	0.2835	0.2583	0.3094	2.56462e-84
temporal cortex	Right superior temporal gyrus	STG_R	YES; TBV	13400	1670	8980	18300	13300	1640	10100	17700	12700	1540	9840	16900	-0.05708	-0.08729	-0.02722	0.00016223	-0.0106	-0.02212	0.0009803	1.8132e-22	5.111e-05	-0.0003512	0.0004527	0.802795	0.1514	0.1365	0.1666	1.2662e-73
frontal cortex	Right frontal pole	FP_R	YES; TBV	1340	286	705	2210	1270	267	750	2070	1220	237	617	1910	0.03813	-0.01703	0.09305	0.172716	-0.0413	-0.0833	NA	3.84981e-10	0.0008945	NA	NA	0.224762	0.03604	0.007908	0.06426	0.0118351
temporal cortex	Right temporal pole	TP_R	YES; TBV	2480	447	1080	3610	2490	447	1200	3510	2500	375	1540	3530	-0.0975	-0.1893	-0.007127	0.0344724	-0.002608	-0.0587	NA	0.630274	0.0001472	-0.001822	0.002114	0.882938	0.2032	0.1547	0.2529	3.06605e-16
temporal cortex	Right transverse temporal gyrus	TTG_R	YES; TBV	1010	196	540	1600	992	189	599	1520	950	186	520	1520	-0.3649	-0.7889	0.05303	0.0871453	-0.1736	-0.3194	-0.02754	3.03874e-10	0.00377	-0.00141	0.008924	0.153173	1.072	0.8717	1.271	1.50827e-23
insular cortex	Right insula	Ins_R	YES; TBV	7390	886	4820	10100	7480	930	4890	9940	7370	936	5130	9760	-0.04564	-0.1972	0.1047	0.549709	0.0286	-0.05197	0.1093	0.140643	-0.001267	-0.004102	0.001556	0.379699	0.6813	0.6045	0.7592	6.85039e-53
white matter FA	Left anterior thalamic radiation	ATR_L	YES; GFA	0.405	0.0168	0.357	0.458	0.409	0.0153	0.374	0.453	0.403	0.0172	0.357	0.456	-0.00436	-0.007846	-0.0008827	0.0141373	0.005303	0.003475	0.007135	0.970095	-0.0001917	-0.0002556	-0.0001265	1.51475e-08	-1.209e-06	-1.743e-05	1.503e-05	0.883855
white matter FA	Right anterior thalamic radiation	ATR_R	YES; GFA	0.372	0.0163	0.328	0.414	0.377	0.0156	0.339	0.423	0.372	0.0161	0.326	0.417	-0.004288	-0.007566	-0.0009749	0.0112108	0.006043	0.00433	0.007741	0	-0.0002126	-0.0002739	-0.0001515	2.77923e-11	-2.655e-06	-1.666e-05	1.103e-05	0.712894
white matter FA	Left corticospinal tract	CST_L	YES; GFA	0.58	0.0185	0.526	0.63	0.578	0.0176	0.536	0.617	0.577	0.0184	0.526	0.624	-0.001107	-0.004744	0.002573	0.551039	0.003009	0.0009834	0.005103	0.0910164	-0.0001147	-0.0001877	-4.388e-05	0.00157682	6.339e-06	NA	7.874e-06	0.264817
white matter FA	right corticospinal tract	CST_R	YES; GFA	0.579	0.0191	0.522	0.631	0.58	0.0172	0.539	0.628	0.577	0.0199	0.529	0.628	-0.001517	-0.005214	0.002216	0.420202	0.003384	0.001323	0.005464	0.951316	-0.0001196	-0.000192	-4.78e-05	0.00116635	1.217e-05	-7.26e-07	2.135e-05	0.0676033
white matter FA	Left cingulum (cingulate gyrus)	CGC_L	YES; GFA	0.396	0.0327	0.299	0.491	0.415	0.0277	0.337	0.491	0.411	0.0274	0.329	0.478	0.003374	-0.003012	0.009889	0.300901	0.01346	0.01068	0.01624	2.42113e-10	-0.0004061	-0.0005034	-0.0003101	2.29072e-15	2.355e-06	-1.407e-05	1.798e-05	0.776656
white matter FA	Right cingulum (cingulate gyrus)	CGC_R	YES; GFA	0.36	0.0373	0.252	0.457	0.377	0.0369	0.273	0.475	0.379	0.0345	0.288	0.47	0.002702	-0.005479	0.01083	0.513007	0.01312	0.01014	0.01607	3.56135e-18	-0.0003765	-0.0004806	-0.0002708	1.87996e-11	1.316e-05	-2.157e-06	NA	0.15093
white matter FA	Left cingulum (hippocampus)	CGH_L	YES; GFA	0.342	0.0278	0.265	0.41	0.347	0.0287	0.277	0.423	0.344	0.0267	0.274	0.422	0.0002052	-0.005392	0.005797	0.942401	0.004591	0.001418	0.007713	0.000714089	-0.0001378	-0.0002476	-2.541e-05	0.0167345	9.793e-07	-1.694e-05	1.896e-05	0.914685
white matter FA	Right cingulum (hippocampus)	CGH_R	YES; GFA	0.362	0.0292	0.284	0.444	0.372	0.0282	0.295	0.448	0.371	0.026	0.302	0.434	-0.003555	-0.009461	0.002329	0.235048	0.003643	0.0003165	0.006961	8.9559e-08	-8.475e-05	-0.0002031	3.238e-05	0.156133	-3.024e-06	NA	NA	0.776814
white matter FA	Forceps major	Fmajor	YES; GFA	0.525	0.0213	0.46	0.576	0.538	0.0192	0.485	0.586	0.534	0.0193	0.482	0.584	8.005e-05	-0.004318	0.004501	0.971434	0.008691	0.006395	0.01101	5.72807e-11	-0.0002626	-0.0003449	-0.0001825	2.92643e-10	-2.335e-06	-1.625e-05	NA	0.743419
white matter FA	Forceps minor	Fminor	YES; GFA	0.436	0.0168	0.389	0.481	0.439	0.0159	0.397	0.474	0.427	0.0165	0.381	0.474	-0.003467	-0.006726	-0.0001786	0.0379441	0.002841	0.0009005	0.004803	2.64162e-08	-0.0001367	-0.0002062	-6.811e-05	0.000104001	-1.169e-05	-2.56e-05	2.244e-06	0.101366
white matter FA	Left inferior fronto-occipital fasciculus	IFOF_L	YES; GFA	0.451	0.021	0.389	0.508	0.46	0.0182	0.417	0.505	0.453	0.0186	0.405	0.51	-0.00659	-0.01088	-0.002307	0.00252136	0.007529	0.005162	0.00986	0.0015973	-0.0002516	-0.0003347	-0.0001673	1.10491e-08	-4.018e-06	NA	1.156e-05	0.608857
white matter FA	Right inferior fronto-occipital fasciculus	IFOF_R	YES; GFA	0.447	0.0191	0.39	0.5	0.454	0.0176	0.408	0.493	0.448	0.0171	0.401	0.495	-0.006581	-0.01047	-0.002693	0.000940544	0.005767	0.003646	0.007883	0.51809	-0.0002024	-0.0002756	-0.0001284	1.81287e-07	-2.772e-05	NA	-8.984e-06	0.00415867
white matter FA	Left inferior longitudinal fasciculus	ILF_L	YES; GFA	0.383	0.016	0.335	0.429	0.392	0.0145	0.353	0.433	0.39	0.0152	0.35	0.43	-0.005884	-0.009159	-0.002614	0.000452635	0.007027	0.005185	0.008855	1.07268e-09	-0.0002186	-0.0002842	-0.000153	2.03768e-10	-3.038e-06	-1.324e-05	8.872e-06	0.614299
white matter FA	Right inferior longitudinal fasciculus	ILF_R	YES; GFA	0.421	0.0176	0.37	0.471	0.43	0.018	0.382	0.472	0.428	0.0168	0.378	0.478	-0.00739	-0.01099	-0.003763	7.22329e-05	0.006276	0.004349	0.008207	1.96044e-07	-0.0001952	-0.0002599	NA	4.56197e-08	-3.277e-06	NA	NA	0.582445
white matter FA	Left superior longitudinal fasciculus	SLF_L	YES; GFA	0.347	0.0151	0.309	0.389	0.359	0.0133	0.325	0.397	0.356	0.0136	0.321	0.393	-0.003674	-0.006647	-0.0007042	0.015489	0.007264	0.005488	0.009055	2.3697e-13	-0.0002134	-0.0002771	-0.0001506	4.64986e-11	-1.692e-06	-1.2e-05	NA	0.7513
white matter FA	Right superior longitudinal fasciculus	SLF_R	YES; GFA	0.37	0.0177	0.32	0.425	0.383	0.0164	0.339	0.424	0.382	0.0147	0.339	0.42	-0.00378	-0.007255	-0.0002949	0.0327008	0.007601	0.005865	0.009348	4.80089e-17	-0.0002153	-0.0002774	-0.0001543	1.56681e-11	9.457e-06	-1.785e-06	2.1e-05	0.106342
white matter FA	Left uncinate fasciculus	UNC_L	YES; GFA	0.379	0.0228	0.319	0.447	0.386	0.0204	0.336	0.44	0.379	0.0219	0.321	0.444	-0.001967	-0.006768	0.002834	0.418751	0.007892	0.00569	0.01008	0.171962	-0.0002762	-0.0003479	-0.0001974	4.53256e-11	1.453e-05	NA	2.939e-05	0.0748149
white matter FA	Right uncinate fasciculus	UNC_R	YES; GFA	0.399	0.0264	0.33	0.471	0.407	0.0219	0.354	0.461	0.402	0.0231	0.343	0.471	0.0003641	-0.004682	0.005439	0.886891	0.007543	0.005203	0.009895	0.0426996	-0.0002534	-0.0003342	-0.0001712	3.28537e-09	1.296e-05	NA	NA	0.0713362
white matter FA	Left superior longitudinal fasciculus (temporal part)	SLFtemp_L	YES; GFA	0.46	0.0369	0.375	0.566	0.468	0.0383	0.357	0.555	0.465	0.0364	0.372	0.57	-0.004956	-0.01285	0.002948	0.219126	0.003417	0.0003929	0.006435	7.10563e-05	-9.326e-05	-0.0001979	1.33e-05	0.0855587	-1.963e-05	NA	-1.173e-06	0.03712
white matter FA	Right superior longitudinal fasciculus (temporal part)	SLFtemp_R	YES; GFA	0.528	0.0436	0.404	0.638	0.527	0.0416	0.419	0.623	0.517	0.0369	0.408	0.612	0.0002361	-0.008797	0.009264	0.958917	0.0007169	-0.002364	0.003814	1.19089e-05	-6.146e-05	-0.0001688	4.556e-05	0.256498	-5.154e-06	-2.404e-05	1.384e-05	0.598671
white matter MD	Left anterior thalamic radiation	ATR_L	YES; GMD	0.726	0.0273	0.664	0.817	0.732	0.0229	0.682	0.805	0.753	0.0274	0.664	0.845	0.00473	-0.0007908	0.01029	0.09122	-0.0005416	-0.00372	0.002643	1.12107e-18	0.0001275	1.606e-05	0.0002319	0.0252731	-8.31e-05	-0.0001216	-4.394e-05	5.60725e-05
white matter MD	Right anterior thalamic radiation	ATR_R	YES; GMD	0.747	0.0279	0.688	0.839	0.755	0.0224	0.707	0.83	0.769	0.0248	0.695	0.845	0.005175	4.429e-06	0.01037	0.050373	-0.0006378	-0.003549	0.002326	3.32252e-16	0.0001094	6.641e-06	0.00021	0.0360203	-6.985e-05	-0.000103	-3.605e-05	7.91013e-05
white matter MD	Left corticospinal tract	CST_L	YES; GMD	0.734	0.015	0.695	0.776	0.725	0.0137	0.687	0.766	0.718	0.0187	0.667	0.762	0.003287	0.0002162	0.006372	0.0359424	-0.006943	-0.00898	-0.004899	2.5877e-23	0.0001782	NA	0.0002518	2.84072e-06	1.015e-05	NA	NA	0.253783
white matter MD	right corticospinal tract	CST_R	YES; GMD	0.736	0.0159	0.698	0.784	0.728	0.0141	0.691	0.76	0.718	0.0195	0.662	0.771	0.003481	0.0001917	0.006811	0.0380292	-0.006356	-0.008362	-0.004349	4.65462e-26	0.0001467	7.52e-05	0.0002162	9.21206e-05	1.553e-05	NA	3.154e-05	0.0789399
white matter MD	Left cingulum (cingulate gyrus)	CGC_L	YES; GMD	0.755	0.0252	0.692	0.824	0.757	0.0215	0.703	0.809	0.773	0.0245	0.702	0.835	0.004394	-0.0006043	0.009294	0.0833563	-0.003431	-0.006401	-0.0004729	2.45093e-11	0.0001863	8.186e-05	0.0002908	0.000474062	-1.075e-06	-1.9e-05	1.926e-05	0.917237
white matter MD	Right cingulum (cingulate gyrus)	CGC_R	YES; GMD	0.757	0.0261	0.691	0.826	0.761	0.024	0.694	0.832	0.773	0.0251	0.701	0.85	0.0008222	-0.004417	0.006074	0.757358	-0.003131	-0.00628	-1.862e-05	2.18142e-10	0.0001662	5.849e-05	0.0002761	0.00292686	-2.225e-06	-2.312e-05	1.861e-05	0.83374
white matter MD	Left cingulum (hippocampus)	CGH_L	YES; GMD	0.809	0.0259	0.747	0.888	0.802	0.024	0.731	0.874	0.793	0.0244	0.726	0.861	0.0007666	-0.004179	0.005756	0.760752	-0.003767	-0.007201	-0.0003251	2.27314e-15	5.814e-05	-6.295e-05	0.0001729	0.344604	-3.394e-06	-2.557e-05	1.897e-05	0.766862
white matter MD	Right cingulum (hippocampus)	CGH_R	YES; GMD	0.8	0.0235	0.737	0.868	0.796	0.0228	0.744	0.864	0.793	0.0237	0.718	0.878	0.002548	-0.002288	0.007382	0.297841	-0.003689	-0.006851	-0.0005068	1	9.576e-05	-1.714e-05	0.0002073	0	-4.682e-06	-2.612e-05	NA	0.670363
white matter MD	Forceps major	Fmajor	YES; GMD	0.868	0.0456	0.761	1	0.855	0.046	0.752	0.99	0.845	0.046	0.743	0.973	0.01229	0.002968	0.02149	0.00974033	-0.01003	-0.01306	-0.006963	3.99641e-18	0.0002667	0.0001614	0.0003728	1.48644e-06	-4.229e-06	-1.974e-05	NA	0.713179
white matter MD	Forceps minor	Fminor	YES; GMD	0.763	0.0267	0.689	0.828	0.77	0.0197	0.724	0.818	0.791	0.0247	0.726	0.855	0.0006547	-0.003943	0.005265	0.778853	0.0008854	-0.002442	0.004208	3.7268e-21	7.897e-05	-3.686e-05	0.0001927	0.181445	7.77e-06	-1.265e-05	2.757e-05	0.452979
white matter MD	Left inferior fronto-occipital fasciculus	IFOF_L	YES; GMD	0.752	0.0241	0.695	0.816	0.749	0.0175	0.704	0.795	0.763	0.023	0.694	0.819	0.005719	0.001416	0.01003	0.00913011	-0.00398	-0.006975	-0.0009864	1.69304e-05	0.000179	7.55e-05	0.0002843	0.000868399	1.313e-05	-4.397e-06	2.842e-05	0.137424
white matter MD	Right inferior fronto-occipital fasciculus	IFOF_R	YES; GMD	0.759	0.0244	0.693	0.825	0.762	0.017	0.715	0.806	0.774	0.0236	0.707	0.833	0.003532	-0.000834	0.007913	0.110875	-0.00109	-0.004101	0.001921	4.03743e-09	9.392e-05	-1.071e-05	0.000199	0.081324	1.414e-05	-4.366e-06	3.197e-05	0.136079
white matter MD	Left inferior longitudinal fasciculus	ILF_L	YES; GMD	0.782	0.0198	0.724	0.838	0.767	0.0167	0.719	0.813	0.772	0.0215	0.71	0.829	0.005849	0.002072	0.009559	0.0023911	-0.009912	-0.0126	-0.007243	6.48312e-14	0.0002999	0.000205	NA	1.46304e-09	1.355e-05	NA	2.812e-05	0.0814877
white matter MD	Right inferior longitudinal fasciculus	ILF_R	YES; GMD	0.777	0.0223	0.712	0.841	0.768	0.0164	0.73	0.818	0.774	0.0233	0.706	0.833	0.005177	0.001031	0.009337	0	-0.007091	-0.009705	-0.00447	0.00119807	0.0002325	0.0001395	0.0003232	1.70236e-06	4.583e-06	-1.198e-05	2.101e-05	0.594976
white matter MD	Left superior longitudinal fasciculus	SLF_L	YES; GMD	0.762	0.0206	0.712	0.818	0.752	0.0181	0.71	0.802	0.762	0.0236	0.695	0.828	0.007846	0.003738	0.01194	0.000193825	-0.01119	-0.01371	-0.008637	0.00237732	0.0003843	0.0002912	0.0004766	1.35511e-14	3.897e-06	-1.563e-05	NA	0.710595
white matter MD	Right superior longitudinal fasciculus	SLF_R	YES; GMD	0.745	0.0216	0.688	0.802	0.739	0.0203	0.692	0.797	0.748	0.0228	0.686	0.804	0.008552	0.004044	0.01309	0.00022626	-0.008006	-0.01034	-0.005663	0.422273	0.0002885	0.0002033	0.0003733	1.3017e-10	1.789e-06	-1.845e-05	2.16e-05	0.861255
white matter MD	Left uncinate fasciculus	UNC_L	YES; GMD	0.793	0.0208	0.738	0.853	0.789	0.0169	0.748	0.836	0.802	0.0238	0.739	0.871	-8.127e-06	-0.00425	0.004251	0.997327	-0.006978	-0.009641	-0.004309	1	0.0002798	0.000188	0.0003743	0	-1.98e-06	-2.418e-05	1.926e-05	0.859192
white matter MD	Right uncinate fasciculus	UNC_R	YES; GMD	0.789	0.0231	0.727	0.856	0.791	0.0188	0.743	0.848	0.8	0.0244	0.743	0.868	-0.001677	-0.006145	0.002762	0.45788	-0.003813	-0.006885	-0.0007217	0.000106223	0.0001663	5.875e-05	0.0002732	0.00257054	5.323e-06	-2.059e-05	2.981e-05	0.679798
white matter MD	Left superior longitudinal fasciculus (temporal part)	SLFtemp_L	YES; GMD	0.757	0.0277	0.69	0.839	0.724	0.0265	0.666	0.803	0.72	0.0254	0.661	0.791	0.002994	-0.002317	0.008253	0.265113	-0.01585	-0.02008	-0.01168	6.83778e-31	0.0003994	0.0002529	0.0005483	1.39262e-07	-5.433e-07	-2.538e-05	2.422e-05	0.965831
white matter MD	Right superior longitudinal fasciculus (temporal part)	SLFtemp_R	YES; GMD	0.759	0.0258	0.693	0.826	0.742	0.0238	0.681	0.804	0.742	0.0247	0.672	0.809	0.003037	-0.001889	0.007972	0.223528	-0.008838	-0.01215	-0.00552	3.22557e-14	0.0002365	0.0001187	0.0003535	8.70095e-05	3.546e-05	7.925e-06	NA	0.0121512

## Sheet: Heritabilities
				Assessment #1: 10 years												Assessment #2: 13 years												Assessment #3: 18 years
Brain measure				Heritability				Common environment				Unique environment				Heritability				Common environment				Unique environment				Heritability				Common environment				Unique environment
atlas	region	abbreviation	correct global brain	estimate	lower CI	upper CI	p-value	estimate	lower CI	upper CI	p-value	estimate	lower CI	upper CI	p-value	estimate	lower CI	upper CI	p-value	estimate	lower CI	upper CI	p-value	estimate	lower CI	upper CI	p-value	estimate	lower CI	upper CI	p-value	estimate	lower CI	upper CI	p-value	estimate	lower CI	upper CI	p-value
global	Total brain volume	TBV	NO	0.8937	0.7511	0.9405	0	0.0223	0	0.165	0.261987	0.084	0.0574	0.1254	–	0.916	0.7893	0.9488	0	0.0067	0	0.1357	0.347226	0.0773	0.0497	0.1215	–	0.9279	0.7689	0.9742	0	0.0349	0	0.1956	0.257353	0.0373	0.0248	0.0582	–
global	Global white matter mean fractional anisotropy	GFA	NO	0.6431	0.435	0.7626	6.45649e-05	0.0157	0	0.1644	0.257741	0.3412	0.2288	0.4925	–	0.7254	0.4381	0.813	6.71286e-05	0.0047	0	0.2563	0.38913	0.2699	0.1856	0.3931	–	0.5123	0.206	0.7842	0.000288378	0.1825	0	0.4153	0.0943506	0.3051	0.1959	0.4651	–
global	Global white matter mean diffusivity	GMD	NO	0.7305	0.5305	0.8502	4.07192e-07	0.1047	0.0085	0.2864	0.013158	0.1648	0.1129	0.245	–	0.6934	0.4421	0.8353	1.0406e-06	0.0977	0.0024	0.3104	0.0253515	0.2089	0.1357	0.3222	–	0.3436	0.1301	0.6423	6.2286e-05	0.2762	0.0618	0.4649	0.00751081	0.3802	0.2486	0.5222	–
global	Total cortical gray matter volume	CGM	YES; TBV	0.6731	0.495	0.7786	3.39489e-08	0.0049	NA	0.1373	0.340608	0.322	0.2144	0.4523	–	0.4895	0.2647	0.7701	4.85029e-07	0.2039	0	0.4172	0.0924436	0.3065	0.2074	0.4256	–	0.6702	0.4395	0.7815	2.21628e-08	0.0261	0	0.2452	0.226312	0.3038	0.2133	0.4109	–
global	Total subcortical gray matter volume	SGM	YES; TBV	0.6065	0.3789	0.7355	1.64311e-05	0.0505	0	0.2176	0.146926	0.343	0.2416	0.4748	–	0.5931	0.3192	0.7988	3.04123e-05	0.1415	0	0.3569	0.115091	0.2655	0.1757	0.3969	–	0.6279	0.3724	0.8257	1.59563e-05	0.1394	0	0.3495	0.115085	0.2326	0.1571	0.3456	–
global	Total cortical white matter volume	WMV	YES; TBV	0.6759	0.5192	0.7825	3.1615e-08	0.0138	0	0.1174	0.221851	0.3103	0.2063	0.4482	–	0.5586	0.3561	0.7945	9.25772e-09	0.1861	0	0.384	0.0866431	0.2553	0.177	0.3609	–	0.7196	0.4564	0.8655	8.15444e-09	0.094	0	0.3174	0.133272	0.1864	0.1216	0.2849	–
subcortical	Left putamen	PUT_L	YES; TBV	0.7433	0.5572	0.8745	9.84951e-09	0.0863	0	0.2578	0.184903	0.1704	0.1155	0.2506	–	0.6145	0.4053	0.8064	1.18057e-08	0.1249	0	0.3265	0.184903	0.2606	0.1825	0.3587	–	0.6664	0.4607	0.7961	1.13486e-08	0.0697	0	0.2548	0.184903	0.2639	0.1854	0.3675	–
subcortical	Left hippocampus	HIP_L	YES; TBV	0.5159	0.2108	0.6588	0.000350207	0	NA	0.1971	0.499999	0.4841	0.3415	0.6574	–	0.6588	0.3535	0.7661	0.000161165	0	NA	0.2242	0.5	0.3412	0.2343	0.4928	–	0.6466	0.3793	0.7595	0.000142337	0	NA	0.1849	0.499997	0.3534	0.2398	0.5082	–
subcortical	Left amygdala	AMY_L	YES; TBV	0.3942	0.0194	0.6509	0.0412194	0.1171	0	0.358	0.217049	0.4887	0.3475	0.6811	–	0.3149	0.0029	0.6199	0.0428073	0.153	0	0.3906	0.165172	0.5321	0.3681	0.7286	–	0.1823	0	0.5065	0.0690934	0.1319	0	0.3167	0.166047	0.6859	0.4804	0.8403	–
subcortical	Right putamen	PUT_R	YES; TBV	0.7273	0.4847	0.8488	2.8725e-08	0.0663	0	0.27	0.190001	0.2064	0.1395	0.3089	–	0.6774	0.4402	0.8838	2.84484e-08	0.1462	0	0.3545	0.132648	0.1764	0.1071	0.2767	–	0.7327	0.5115	0.8537	2.58514e-08	0.0698	0	0.2632	0.170374	0.1976	0.1316	0.2934	–
subcortical	Right hippocampus	HIP_R	YES; TBV	0.5939	0.3908	0.7219	4.57783e-06	0.0013	NA	0.1285	0.436773	0.4047	0.2783	0.5589	–	0.7518	0.5447	0.8317	3.38211e-06	0.0009	NA	0.17	0.461816	0.2474	0.1685	0.362	–	0.6814	0.4508	0.7971	4.63697e-06	0.0101	0	0.1715	0.389815	0.3085	0.203	0.4557	–
subcortical	Right amygdala	AMY_R	YES; TBV	0.5524	0.2938	0.6837	0.00142383	0	NA	0.1583	0.499994	0.4476	0.3165	0.6128	–	0.4525	0.1953	0.6152	0.00187663	0	NA	0.1574	0.499989	0.5475	0.3861	0.7278	–	0.4957	0.1119	0.6499	0.00505122	0	NA	0.2345	0.499994	0.5043	0.3499	0.7194	–
temporal cortex	Left banks of superior temporal gyrus	Bank_L	YES; TBV	0.3446	0.1474	0.5252	0.00228389	0.0007	NA	0.0954	0.441588	0.6547	0.4749	0.8314	–	0.3305	0.0961	0.5513	0.00362329	0.0252	0	0.1676	0.333608	0.6444	0.4484	0.8366	–	0.4792	0.2493	0.6455	0.00204922	0.0013	NA	0.1144	0.429207	0.5195	0.354	0.7145	–
anterior cingulum	Left caudal anterior cingulate cortex	ACc_L	YES; TBV	0.328	0.0265	0.4921	0.0324866	0	NA	0.1893	0.5	0.672	0.5071	0.8498	–	0.3515	0.0534	0.5464	0.0284729	0	NA	0.1631	0.5	0.6485	0.4548	0.8446	–	0.2169	0.0183	0.3819	0.0284991	0	NA	0.1409	0.5	0.7831	0.6178	0.9225	–
frontal cortex	Left caudal middle frontal gyrus	cMFG_L	YES; TBV	0.1802	0	0.5395	0.127586	0.2038	0	0.3828	0.0697347	0.616	0.4282	0.7865	–	0.0549	0	0.446	0.292724	0.2439	0	0.3889	0.0696372	0.7012	0.5201	0.8358	–	0.1175	0	0.4398	0.250356	0.1585	0	0.331	0.080866	0.724	0.5303	0.881	–
temporal cortex	Left entorhinal gyrus	Ent_L	YES; TBV	0.2573	0	0.5514	0.0600204	0.1846	0	0.3932	0.0981773	0.5581	0.4245	0.7089	–	0.2434	0	0.4699	0.0600204	0.087	0	0.2765	0.100832	0.6696	0.5047	0.8363	–	0.3099	0	0.548	0.0600204	0.0842	0	0.2851	0.103668	0.6058	0.4265	0.8033	–
temporal cortex	Left fusiform gyrus	FG_L	YES; TBV	0.3237	0.0871	0.52	0.0123985	0	NA	0.1071	0.499992	0.6763	0.4802	0.8752	–	0.3627	0.0548	0.5892	0.0182827	0	NA	0.145	0.5	0.6373	0.4109	0.879	–	0.3448	0.0849	0.5589	0.0128323	0	NA	0.1107	0.499994	0.6552	0.4412	0.8814	–
temporal cortex	Left inferior temporal gyrus	ITG_L	YES; TBV	0.4131	0.0243	0.618	0.0329538	0.082	0	0.328	0.141735	0.5049	0.3669	0.6993	–	0.2751	0.0203	0.5644	0.0266492	0.1918	0.001	0.3865	0.0418339	0.5331	0.3808	0.702	–	0.4873	0.1895	0.6829	0.0240091	0.0409	0	0.2514	0.201899	0.4718	0.3079	0.7011	–
frontal cortex	Left lateral orbitofrontal gyrus	lOFG_L	YES; TBV	0.2326	0.0645	0.4484	0.00146831	0.1975	0.0232	0.3572	0.0308797	0.5699	0.4558	0.6902	–	0.4752	0.238	0.6308	0.000338384	0.0466	0	0.2042	0.119982	0.4782	0.3516	0.6292	–	0.5721	0.3291	0.7369	0.000338384	0.0946	0	0.273	0.0644964	0.3333	0.2269	0.4769	–
frontal cortex	Left medial orbitofrontal gyrus	mOFG_L	YES; TBV	0.3253	0.0988	0.5132	0.00215254	0.0537	0	0.21	0.200083	0.621	0.4707	0.7818	–	0.4235	0.2489	0.5821	0.000885395	0	NA	0.0846	0.492922	0.5765	0.4179	0.75	–	0.4229	0.2293	0.5722	0.000885395	0.0001	NA	0.1075	0.476823	0.5769	0.4266	0.7417	–
temporal cortex	Left middle temporal gyrus	MTG_L	YES; TBV	0.4509	0.1187	0.6575	0.00932099	0.0814	0	0.2834	0.130371	0.4676	0.3236	0.6589	–	0.2842	0.0188	0.6087	0.022465	0.1798	0	0.3871	0.130371	0.536	0.3886	0.7058	–	0.4751	0.1686	0.6535	0.00962024	0.0423	0	0.2295	0.180904	0.4827	0.3343	0.6719	–
temporal cortex	Left parahippocampal gyrus	Par_L	YES; TBV	0.4985	0.2177	0.6344	0.00121771	0.0217	0	0.2323	0.339679	0.4798	0.3612	0.6228	–	0.6572	0.34	0.8144	0.00121771	0.0519	0	0.2834	0.297275	0.2909	0.1834	0.4565	–	0.3932	0.1355	0.5956	0.00146474	0.071	0	0.2801	0.282364	0.5357	0.4035	0.6813	–
frontal cortex	Left pars opercularis	Opr_L	YES; TBV	0.3446	0.0856	0.5277	0.0221974	0.002	NA	0.1302	0.416112	0.6534	0.472	0.8416	–	0.3484	0.0586	0.5527	0.0223938	0.0107	NA	0.1673	0.324316	0.6408	0.4446	0.8484	–	0.2965	0.0409	0.5081	0.0239141	0.0047	NA	0.1437	0.380314	0.6988	0.491	0.8958	–
frontal cortex	Left pars orbitalis	Orb_L	YES; TBV	0.3812	0.0712	0.5338	0.0152756	0.0141	NA	0.2304	0.453404	0.6048	0.4662	0.7695	–	0.3504	0.0897	0.5198	0.0142264	0.0073	NA	0.183	0.453404	0.6423	0.4813	0.814	–	0.2895	0.0368	0.4633	0.0187508	0.0002	NA	0.1609	0.478519	0.7103	0.5352	0.8888	–
frontal cortex	Left pars triangularis	Tri_L	YES; TBV	0.305	0.0171	0.4881	0.0331846	0.0292	0	0.2274	0.303827	0.6658	0.5081	0.836	–	0.4418	0.0781	0.6075	0.0316073	0.0006	NA	0.2288	0.468929	0.5576	0.3921	0.7491	–	0.3132	0.0168	0.495	0.0336482	0.0195	0	0.2177	0.327229	0.6673	0.5037	0.846	–
anterior cingulum	Left rostral anterior cingulate gyrus	ACr_L	YES; TBV	0.1795	0	0.5205	0.158127	0.2354	0	0.4327	0.0587465	0.5851	0.431	0.7448	–	0.2462	0	0.5413	0.0911425	0.1997	0	0.419	0.0587465	0.5542	0.4048	0.7256	–	0.2887	0	0.5742	0.0934359	0.1683	0	0.4041	0.0588411	0.5431	0.3819	0.744	–
frontal cortex	Left rostral middle frontal gyrus	rMFG_L	YES; TBV	0.5309	0.2462	0.6517	0.000200188	0	NA	0.196	0.5	0.4691	0.3484	0.6168	–	0.6287	0.4233	0.739	3.27631e-05	0	NA	0.1478	0.5	0.3713	0.2618	0.5119	–	0.7316	0.5078	0.829	3.33035e-05	0	NA	0.1577	0.5	0.2684	0.171	0.417	–
frontal cortex	Left superior frontal gyrus	SFG_L	YES; TBV	0.2916	0	0.5254	0.0574232	0.0927	0	0.2743	0.0596328	0.6157	0.4331	0.8221	–	0.1784	0	0.4635	0.0748758	0.1949	0.0015	0.3785	0.0445054	0.6267	0.4486	0.8017	–	0.1483	0	0.5508	0.123117	0.2821	0.0015	0.4548	0.0452977	0.5696	0.3964	0.7241	–
temporal cortex	Left superior temporal gyrus	STG_L	YES; TBV	0.6897	0.4393	0.8077	0.000127309	0.0391	0	0.2327	0.255824	0.2712	0.1867	0.3952	–	0.6751	0.3855	0.7844	0.00015994	0.0016	NA	0.2081	0.443822	0.3233	0.2142	0.4766	–	0.6395	0.3549	0.7869	0.000157372	0.0505	0	0.2597	0.248564	0.31	0.2087	0.4551	–
frontal cortex	Left frontal pole	FP_L	YES; TBV	0.0142	NA	0.1382	0.271392	0.003	NA	0.1114	0.479536	0.9828	0.8531	NA	–	0.0434	0	0.1945	0.155846	0.0014	NA	0.1037	0.479536	0.9552	0.8041	1	–	0.1496	0	0.3287	0.0987777	0.0005	NA	0.1632	0.47954	0.8499	0.6697	0.9831	–
temporal cortex	Left temporal pole	TP_L	YES; TBV	0.4479	0.1904	0.615	0.0036718	0.0223	NA	0.1746	0.238043	0.5298	0.3801	0.7072	–	0.2791	0.0126	0.5113	0.0367452	0.0073	NA	0.1538	0.341188	0.7135	0.486	0.9351	–	0.1907	0.001	0.4	0.0429	0.0291	0	0.1747	0.209965	0.7802	0.5899	0.9551	–
temporal cortex	Left transverse temporal gyrus	TTG_L	YES; TBV	0.3471	0.0428	0.5672	0.0272593	0.084	0	0.2757	0.108407	0.5689	0.4134	0.7515	–	0.4091	0.0679	0.6292	0.0272593	0.0819	0	0.297	0.12432	0.5091	0.3498	0.7054	–	0.2721	0.0147	0.5278	0.0288271	0.1589	0	0.3608	0.0818688	0.569	0.4314	0.7254	–
insular cortex	Left insula	Ins_L	YES; TBV	0.4348	0.1805	0.6301	0.00383816	0.1335	0.0028	0.3211	0.0341733	0.4316	0.3125	0.5761	–	0.3754	0.1329	0.5769	0.00393338	0.1484	0.0031	0.353	0.0338787	0.4762	0.3508	0.616	–	0.2734	0.0306	0.6066	0.0121112	0.3194	0.0499	0.5179	0.0250334	0.4072	0.2755	0.5599	–
temporal cortex	Right banks of superior temporal gyrus	Bank_R	YES; TBV	0.0981	0	0.4001	0.283126	0.1354	0	0.3005	0.185796	0.7665	0.5953	0.911	–	0.11	0	0.4254	0.29595	0.1266	0	0.3227	0.185796	0.7634	0.5705	0.924	–	0.1047	0	0.3527	0.194677	0.1052	0	0.2794	0.185796	0.7901	0.6292	0.9305	–
anterior cingulum	Right caudal anterior cingulate cortex	ACc_R	YES; TBV	0.3824	0.0659	0.5822	0.0231181	0.0439	0	0.2294	0.197447	0.5737	0.4094	0.7701	–	0.3755	0.0594	0.5615	0.0265201	0.0067	0	0.1676	0.352071	0.6179	0.4354	0.8211	–	0.3047	0.0173	0.5023	0.0323692	0.0216	0	0.1846	0.253731	0.6737	0.4911	0.8624	–
frontal cortex	Right caudal middle frontal gyrus	cMFG_R	YES; TBV	0.3582	0.0287	0.5341	0.0400321	0	NA	0.1847	0.499993	0.6418	0.4659	0.8246	–	0.2891	0.1159	0.4737	0.0400321	0	NA	0.1578	0.5	0.7109	0.5251	0.8841	–	0.2157	0.0657	0.4022	0.0400321	0	NA	0.1296	0.5	0.7843	0.5994	0.9343	–
temporal cortex	Right entorhinal gyrus	Ent_R	YES; TBV	0.2396	0	0.4893	0.0569244	0.0851	0	0.2739	0.176959	0.6753	0.5019	0.848	–	0.2798	0.0012	0.5205	0.0534627	0.0103	0	0.2093	0.34301	0.7098	0.479	0.9145	–	0.323	0	0.5186	0.0522225	0.006	0	0.183	0.368841	0.671	0.4806	0.8757	–
temporal cortex	Right fusiform gyrus	FG_R	YES; TBV	0.3256	0.0826	0.4831	0.00679527	0.0002	NA	0.1682	0.473096	0.6742	0.5175	0.8298	–	0.2825	0.0526	0.4754	0.00788238	0.0383	0	0.2201	0.157409	0.6792	0.5111	0.8473	–	0.4692	0.1821	0.6183	0.00625676	0.006	NA	0.2041	0.374305	0.5247	0.3798	0.6945	–
temporal cortex	Right inferior temporal gyrus	ITG_R	YES; TBV	0.3281	0	0.5603	0.0615472	0.0869	0	0.3199	0.23855	0.585	0.4373	0.7682	–	0.2849	0	0.5869	0.121912	0.1209	0	0.3776	0.23855	0.5942	0.4136	0.8045	–	0.2643	0	0.5338	0.10031	0.1007	0	0.3311	0.23855	0.635	0.4653	0.8211	–
frontal cortex	Right lateral orbitofrontal gyrus	lOFG_R	YES; TBV	0.5399	0.3043	0.685	0.000348296	0.027	0	0.171	0.176404	0.4331	0.3064	0.5935	–	0.3374	0.1048	0.5732	0.00137373	0.1154	0	0.2921	0.0710321	0.5472	0.3842	0.728	–	0.3534	0.0718	0.5831	0.00311494	0.0725	0	0.2926	0.305064	0.5741	0.4139	0.7517	–
frontal cortex	Right medial orbitofrontal gyrus	mOFG_R	YES; TBV	0.2923	0.0717	0.4589	0.0175695	0.0009	NA	0.1304	0.445796	0.7068	0.541	0.871	–	0.3043	0.0494	0.5002	0.0186286	0.0095	NA	0.179	0.37299	0.6861	0.4977	0.8734	–	0.1276	0	0.4079	0.0746516	0.058	0	0.2182	0.372345	0.8144	0.5919	0.9608	–
temporal cortex	Right middle temporal gyrus	MTG_R	YES; TBV	0.3598	0.0337	0.5966	0.0305382	0.2277	0.0655	0.4156	0.00329263	0.4125	0.2728	0.6058	–	0.1765	0	0.4537	0.0594798	0.4175	0.1801	0.5948	0.00329263	0.4061	0.2874	0.5477	–	0.1768	0	0.4767	0.0735742	0.3183	0.1134	0.4923	0.00329263	0.5049	0.3457	0.6635	–
temporal cortex	Right parahippocampal gyrus	Par_R	YES; TBV	0.3778	0	0.5812	0.0895084	0.0379	0	0.3126	0.356901	0.5843	0.417	0.8139	–	0.2142	0	0.4905	0.105734	0.0654	0	0.2915	0.365766	0.7204	0.5042	0.8994	–	0.3388	0	0.6319	0.10021	0.1196	0	0.4014	0.249187	0.5416	0.3667	0.7592	–
frontal cortex	Right pars opercularis	Opr_R	YES; TBV	0.2018	0	0.4042	0.135637	0.0174	0	0.201	0.359236	0.7808	0.5934	0.9478	–	0.2367	0	0.4813	0.132515	0.0497	0	0.2786	0.34322	0.7136	0.5174	0.9013	–	0.289	0	0.5054	0.131137	0.0344	0	0.2699	0.343228	0.6766	0.4932	0.892	–
frontal cortex	Right pars orbitalis	Orb_R	YES; TBV	0.1984	0	0.3702	0.0946661	0.0015	NA	0.1548	0.436734	0.8001	0.6297	0.9713	–	0.211	0	0.4673	0.130984	0.0659	0	0.286	0.319874	0.723	0.5327	0.9075	–	0.1523	0	0.3585	0.127084	0.0269	0	0.1807	0.319874	0.8208	0.6397	0.9651	–
frontal cortex	Right pars triangularis	Tri_R	YES; TBV	0.1521	0.0029	0.3344	0.115302	0	NA	0.146	0.499991	0.8479	0.6656	0.9971	–	0.2509	0	0.4409	0.0520664	0	NA	0.1711	0.499986	0.7491	0.5591	0.9414	–	0.2374	0.0085	0.4196	0.0391919	0	NA	0.1273	0.5	0.7626	0.5804	0.9337	–
anterior cingulum	Right rostral anterior cingulate gyrus	ACr_R	YES; TBV	0.0673	0	0.2978	0.26041	0.0651	0	0.1931	0.168965	0.8676	0.6939	0.9804	–	0.0457	0	0.223	0.250491	0.0062	0	0.0939	0.315501	0.9481	0.7776	1	–	0.0071	NA	0.1653	0.370202	0.0221	0	0.1047	0.183893	0.9708	0.8297	1	–
frontal cortex	Right rostral middle frontal gyrus	rMFG_R	YES; TBV	0.0007	NA	0.2778	0.450093	0.2098	0.0116	0.3249	0.0410778	0.7895	0.6383	0.9011	–	0.0956	0	0.3477	0.0838691	0.1557	0.0033	0.3105	0.0410778	0.7486	0.5891	0.8822	–	0.0881	0	0.3807	0.108321	0.2161	0.011	0.3651	0.0410778	0.6958	0.5441	0.8286	–
frontal cortex	Right superior frontal gyrus	SFG_R	YES; TBV	0.3538	0.1499	0.5304	0.00492792	0.0004	NA	0.0988	0.457454	0.6458	0.4697	0.817	–	0.4017	0.1149	0.5978	0.00583051	0.0252	0	0.2063	0.288772	0.5732	0.3971	0.768	–	0.4507	0.2131	0.6238	0.00492792	0.0001	NA	0.1198	0.479517	0.5492	0.3759	0.7387	–
temporal cortex	Right superior temporal gyrus	STG_R	YES; TBV	0.609	0.3163	0.7436	0.0013449	0.0224	0	0.2252	0.378683	0.3686	0.2542	0.5268	–	0.4847	0.1417	0.6381	0.00221009	0.0116	NA	0.267	0.410609	0.5036	0.361	0.6803	–	0.4567	0.1333	0.6396	0.00232279	0.0428	0	0.2879	0.36525	0.5005	0.3595	0.6699	–
frontal cortex	Right frontal pole	FP_R	YES; TBV	0.08	0	0.2429	0.102581	0.0042	NA	0.1117	0.460981	0.9158	0.7565	0.9975	–	0.2165	0	0.3987	0.0713011	0.0039	NA	0.1947	0.460981	0.7796	0.5999	0.9502	–	0.184	0	0.3734	0.0741473	0.0014	NA	0.1626	0.460981	0.8145	0.6269	0.9625	–
temporal cortex	Right temporal pole	TP_R	YES; TBV	0.2332	0.0535	0.3908	0.00714517	0	NA	0.1301	0.499993	0.7668	0.6091	0.8978	–	0.4186	0.0949	0.6032	0.0185105	0	NA	0.21	0.5	0.5814	0.3979	0.7966	–	0.5652	0.2207	0.7061	0.00622953	0	NA	0.2164	0.5	0.4348	0.2929	0.6245	–
temporal cortex	Right transverse temporal gyrus	TTG_R	YES; TBV	0.1486	0	0.4294	0.0913931	0.0962	0	0.2687	0.296841	0.7552	0.5701	0.8887	–	0.1944	0	0.5069	0.0829999	0.0922	0	0.2967	0.296841	0.7134	0.4929	0.8735	–	0.3817	0.0036	0.6177	0.0426991	0.0741	0	0.3265	0.296841	0.5441	0.3819	0.7505	–
insular cortex	Right insula	Ins_R	YES; TBV	0.0564	0	0.4633	0.337223	0.1754	0	0.3189	0.148874	0.7682	0.5298	0.8927	–	0.113	0	0.4128	0.229912	0.1135	0	0.2951	0.149362	0.7735	0.5781	0.9215	–	0.1519	0	0.4631	0.225075	0.143	0	0.3367	0.148874	0.7051	0.5258	0.8755	–
white matter FA	Left anterior thalamic radiation	ATR_L	YES; GFA	0.6068	0.4101	0.7221	0.000112541	0.0046	0	0.1378	0.35731	0.3886	0.2749	0.5316	–	0.765	0.5626	0.8498	0.000112609	0.0051	0	0.1993	0.374336	0.2299	0.1488	0.3571	–	0.5231	0.2147	0.7677	0.00039595	0.1476	0	0.3705	0.0958257	0.3293	0.2123	0.4962	–
white matter FA	Right anterior thalamic radiation	ATR_R	YES; GFA	0.6231	0.3865	0.7884	0.000229437	0.1019	0	0.263	0.078222	0.275	0.178	0.4201	–	0.5658	0.3179	0.796	0.000229095	0.1787	0	0.395	0.0878244	0.2555	0.1786	0.3655	–	0.3748	0.1166	0.6522	0.00149329	0.2763	0.0469	0.4793	0.0309153	0.3488	0.2249	0.5093	–
white matter FA	Left corticospinal tract	CST_L	YES; GFA	0.6432	0.4082	0.7673	1.44195e-05	0.0208	0	0.1914	0.382816	0.336	0.2296	0.4774	–	0.6389	0.3631	0.7729	8.14953e-06	0.0251	NA	0.2602	0.389431	0.3359	0.2253	0.4832	–	0.654	0.3573	0.7932	1.76977e-05	0.0453	0	0.2795	0.382003	0.3008	0.2064	0.4364	–
white matter FA	right corticospinal tract	CST_R	YES; GFA	0.6427	0.4481	0.7713	1.98613e-06	0.0602	0	0.2121	0.0801624	0.2971	0.205	0.4242	–	0.7531	0.5505	0.8599	7.14646e-07	0.0431	0	0.2021	0.1292	0.2038	0.1243	0.339	–	0.506	0.2663	0.7592	4.28629e-06	0.2116	0	0.4144	0.058552	0.2825	0.1975	0.3961	–
white matter FA	Left cingulum (cingulate gyrus)	CGC_L	YES; GFA	0.4625	0.129	0.6452	0	0.0861	0	0.3099	0.0643374	0.4513	0.3223	0.6216	–	0.2954	0.042	0.564	0.0158136	0.2026	0.0194	0.4219	0.0260646	0.502	0.3618	0.6598	–	0.2432	0.0175	0.5314	0.0202049	0.3257	0.0971	0.5179	0.00498336	0.4311	0.2992	0.5805	–
white matter FA	Right cingulum (cingulate gyrus)	CGC_R	YES; GFA	0.5461	0.3496	0.7047	0.000435249	0.0003	NA	0.0748	0.45216	0.4536	0.2953	0.6518	–	0.5799	0.3319	0.7357	0.0004412	0.004	NA	0.1281	0.41671	0.4161	0.264	0.6196	–	0.5319	0.2471	0.7213	0.000599206	0.042	0	0.1871	0.175347	0.4262	0.2669	0.6379	–
white matter FA	Left cingulum (hippocampus)	CGH_L	YES; GFA	0.5689	0.3007	0.6942	0.000524566	0.006	0	0.1899	0.427772	0.4251	0.3033	0.5766	–	0.537	0.2095	0.6932	0.000873142	0.0194	0	0.2575	0.427772	0.4437	0.3068	0.621	–	0.592	0.2282	0.748	0.00117387	0.0308	0	0.2857	0.427772	0.3771	0.2518	0.5594	–
white matter FA	Right cingulum (hippocampus)	CGH_R	YES; GFA	0.5526	0.3278	0.6924	0.00133306	0.0106	0	0.1617	0.28381	0.4367	0.3035	0.5994	–	0.4166	0.1801	0.5736	0.00138912	0.018	0	0.2003	0.211962	0.5654	0.4161	0.7353	–	0.3353	0.11	0.5408	0.00208936	0.0742	0	0.2511	0.070974	0.5905	0.4308	0.7541	–
white matter FA	Forceps major	Fmajor	YES; GFA	0.5976	0.3742	0.7357	0.000451642	0.0129	0	0.1319	0.273277	0.3895	0.2573	0.5673	–	0.5275	0.2297	0.6858	0.0010103	0.006	0	0.2013	0.374382	0.4666	0.3137	0.6638	–	0.5534	0.2919	0.7528	0.000632868	0.1001	0	0.3106	0.177665	0.3464	0.2347	0.5096	–
white matter FA	Forceps minor	Fminor	YES; GFA	0.4658	0.1402	0.6589	0	0.0857	0	0.2836	0.0897158	0.4484	0.3086	0.6351	–	0.4648	0.1632	0.7679	0.00413228	0.2341	0	0.4697	0.0797065	0.301	0.2013	0.4476	–	0.4117	0.0902	0.7388	0.00603633	0.2596	0	0.4891	0.0475362	0.3287	0.2108	0.5002	–
white matter FA	Left inferior fronto-occipital fasciculus	IFOF_L	YES; GFA	0.6116	0.4122	0.7403	5.619e-05	0.0073	0	0.1115	0.327867	0.3812	0.2582	0.5414	–	0.6074	0.3691	0.7532	6.29375e-05	0.0379	0	0.2193	0.306175	0.3547	0.2438	0.5086	–	0.6289	0.3588	0.7795	0.000121201	0.0083	0	0.1471	0.349485	0.3629	0.2202	0.5808	–
white matter FA	Right inferior fronto-occipital fasciculus	IFOF_R	YES; GFA	0.5533	0.3327	0.7058	0.000835477	0.0007	NA	0.1106	0.450482	0.446	0.295	0.6321	–	0.5607	0.2843	0.7122	0.00096688	0.0107	0	0.1883	0.376683	0.4285	0.2872	0.6155	–	0.6189	0.3127	0.7666	0.00102635	0.016	NA	0.2006	0.37413	0.3651	0.2342	0.5661	–
white matter FA	Left inferior longitudinal fasciculus	ILF_L	YES; GFA	0.5463	0.3124	0.7014	0.000282596	0.0403	0	0.1822	0.134796	0.4134	0.2832	0.5775	–	0.5794	0.3343	0.712	0.000284576	0.0038	0	0.1747	0.372071	0.4168	0.2862	0.5869	–	0.3727	0.1195	0.6607	0.00130741	0.1727	0	0.3705	0.108332	0.4546	0.3174	0.6142	–
white matter FA	Right inferior longitudinal fasciculus	ILF_R	YES; GFA	0.6534	0.4231	0.7873	7.57197e-05	0.0341	0	0.1706	0.139391	0.3126	0.2023	0.4714	–	0.6225	0.3887	0.7451	7.3939e-05	0.007	0	0.1188	0.321573	0.3705	0.2528	0.5321	–	0.3413	0.1256	0.6149	0.000585286	0.1511	0	0.3315	0.104971	0.5076	0.3679	0.6557	–
white matter FA	Left superior longitudinal fasciculus	SLF_L	YES; GFA	0.5367	0.3063	0.6799	0	0.0279	0	0.1617	0.158251	0.4354	0.3081	0.5975	–	0.655	0.364	0.845	0.000309706	0.1207	0	0.3532	0.113578	0.2243	0.1396	0.3667	–	0.2591	0.0487	0.5879	0.00447303	0.3045	0.066	0.4772	0.0151647	0.4363	0.2848	0.5932	–
white matter FA	Right superior longitudinal fasciculus	SLF_R	YES; GFA	0.7122	0.5386	0.8158	2.05996e-06	0.0396	0	0.1728	0.127115	0.2483	0.1675	0.3641	–	0.6236	0.3988	0.8337	2.76709e-06	0.2026	0.0133	0.4062	0.0330921	0.1738	0.1108	0.2746	–	0.558	0.3258	0.7638	4.11733e-06	0.1735	0.0082	0.3606	0.0381136	0.2685	0.1792	0.3959	–
white matter FA	Left uncinate fasciculus	UNC_L	YES; GFA	0.7136	0.6522	0.8084	2.78256e-06	0	NA	0.0919	0.499985	0.2864	0.1916	0.4231	–	0.7927	0.638	0.8696	2.76693e-06	0	NA	0.1125	0.5	0.2073	0.1304	0.334	–	0.6441	0.3491	0.7756	7.47205e-05	0	NA	0.1708	0.5	0.3559	0.2242	0.5377	–
white matter FA	Right uncinate fasciculus	UNC_R	YES; GFA	0.678	0.5123	0.7872	2.51237e-05	0.0196	0	0.1509	0.221582	0.3024	0.2066	0.4358	–	0.6415	0.4381	0.7701	2.51237e-05	0.013	0	0.1576	0.272564	0.3455	0.2239	0.4994	–	0.478	0.225	0.7117	0.00010368	0.1486	0	0.3408	0.0784874	0.3733	0.261	0.521	–
white matter FA	Left superior longitudinal fasciculus (temporal part)	SLFtemp_L	YES; GFA	0.0131	0	0.2043	0.296191	0.2283	0.0712	0.3432	0.0147223	0.7586	0.6408	0.8664	–	0.0019	NA	0.1052	0.390797	0.1004	0.0213	0.1982	0.0147223	0.8977	0.7959	0.9698	–	0.1228	0	0.3312	0.0737895	0.1321	0.0089	0.2779	0.0205921	0.7451	0.5955	0.8792	–
white matter FA	Right superior longitudinal fasciculus (temporal part)	SLFtemp_R	YES; GFA	0.3078	0.0294	0.5019	0.0269994	0.0268	0	0.1924	0.222759	0.6654	0.4913	0.8444	–	0.2249	0.0057	0.436	0.0337599	0.0468	0	0.2173	0.219898	0.7283	0.5538	0.8972	–	0.3094	0.0361	0.512	0.0262373	0.0412	0	0.2117	0.154522	0.6494	0.4755	0.8283	–
white matter MD	Left anterior thalamic radiation	ATR_L	YES; GMD	0.5439	0.2697	0.7216	0.000676179	0.0924	0.0001	0.2692	0.0438272	0.3638	0.2414	0.5332	–	0.5356	0.3127	0.7004	0.000658305	0.0687	0.0011	0.2149	0.0303738	0.3958	0.261	0.5782	–	0.5075	0.1984	0.7163	0.00107158	0.0804	0.0005	0.2528	0.0362884	0.4121	0.2485	0.6404	–
white matter MD	Right anterior thalamic radiation	ATR_R	YES; GMD	0.4913	0.2607	0.6741	0.00064295	0.26	0.104	0.4327	0.00012876	0.2488	0.1676	0.3695	–	0.5452	0.2529	0.6972	0.000901361	0.0247	0	0.2233	0.114425	0.4301	0.2901	0.6082	–	0.3493	0.1185	0.5712	0.00142008	0.1862	0.0445	0.3637	0.00174518	0.4645	0.3197	0.6272	–
white matter MD	Left corticospinal tract	CST_L	YES; GMD	0.5355	0.3488	0.6725	7.67523e-05	0	NA	0.0966	0.499988	0.4645	0.3267	0.6285	–	0.7093	0.4434	0.809	0.000104709	0	NA	0.2028	0.5	0.2907	0.1906	0.4421	–	0.7199	0.4592	0.8174	0.000112968	0	NA	0.1852	0.5	0.2801	0.1824	0.4331	–
white matter MD	right corticospinal tract	CST_R	YES; GMD	0.5996	0.3644	0.7243	0.000209903	0	NA	0.1543	0.5	0.4004	0.2764	0.5593	–	0.6256	0.3677	0.7475	0.000204617	0	NA	0.1879	0.499997	0.3744	0.2526	0.5367	–	0.7657	0.5083	0.8475	9.38273e-05	0	NA	0.2052	0.49978	0.2343	0.1524	0.3638	–
white matter MD	Left cingulum (cingulate gyrus)	CGC_L	YES; GMD	0.5177	0.2356	0.7509	0.00110251	0.2009	0.0063	0.4116	0.0401034	0.2814	0.1903	0.42	–	0.4869	0.1875	0.7143	0.00110495	0.1407	0	0.3854	0.0919655	0.3725	0.2576	0.529	–	0.5179	0.1715	0.7665	0.00549342	0.2099	0.0018	0.4429	0.0433578	0.2722	0.1716	0.4461	–
white matter MD	Right cingulum (cingulate gyrus)	CGC_R	YES; GMD	0.7206	0.487	0.8233	1.56307e-05	0.0213	0	0.1825	0.277159	0.2582	0.1721	0.3952	–	0.7248	0.4813	0.8412	1.24706e-05	0.03	0	0.1985	0.225029	0.2453	0.1534	0.3974	–	0.4509	0.223	0.6892	0	0.1492	0	0.3336	0.0849685	0.3998	0.2845	0.5471	–
white matter MD	Left cingulum (hippocampus)	CGH_L	YES; GMD	0.6275	0.3887	0.7412	0.000247753	0.0014	NA	0.1639	0.432038	0.3711	0.258	0.5228	–	0.5985	0.2741	0.7354	0.000702934	0	NA	0.2218	0.495541	0.4015	0.2636	0.5865	–	0.44	0.1716	0.6715	0.000422335	0.1179	0	0.3248	0.131207	0.4421	0.3116	0.6072	–
white matter MD	Right cingulum (hippocampus)	CGH_R	YES; GMD	0.5556	0.2856	0.729	0.000333448	0.0735	0	0.2144	0.0557197	0.3708	0.2354	0.5708	–	0.5597	0.2552	0.744	0.000509404	0.0008	NA	0.1606	0.435009	0.4395	0.2554	0.6815	–	0.321	0.0676	0.64	0.0030834	0.2214	0.0005	0.4136	0.0466841	0.4576	0.3031	0.6335	–
white matter MD	Forceps major	Fmajor	YES; GMD	0.4696	0.2058	0.6744	0.00221127	0.2089	0.0503	0.3925	0.00352866	0.3214	0.2203	0.4631	–	0.2945	0.0759	0.5277	0.00546545	0.3795	0.1781	0.5508	0.000990163	0.326	0.2336	0.449	–	0.3556	0.0311	0.6499	0.013964	0.3055	0.0739	0.5308	0.00347226	0.3389	0.2203	0.5127	–
white matter MD	Forceps minor	Fminor	YES; GMD	0.5527	0.3773	0.71	1.66853e-05	0.2734	0.1343	0.4201	5.59213e-06	0.1738	0.1154	0.2652	–	0.5904	0.3692	0.7395	1.86936e-05	0.1099	0.023	0.2791	0.00158374	0.2997	0.1952	0.4496	–	0.382	0.1398	0.6358	0.000275227	0.1595	0.0036	0.3512	0.0256964	0.4584	0.3188	0.6256	–
white matter MD	Left inferior fronto-occipital fasciculus	IFOF_L	YES; GMD	0.7226	0.5714	0.851	1.76171e-09	0.178	0.0558	0.3216	0.000558289	0.0995	0.0661	0.1563	–	0.7903	0.6295	0.8874	4.53085e-09	0.068	0.004	0.1955	0.015279	0.1417	0.0865	0.2428	–	0.392	0.2087	0.6282	4.05327e-07	0.167	0.0175	0.3296	0.0118551	0.441	0.3057	0.592	–
white matter MD	Right inferior fronto-occipital fasciculus	IFOF_R	YES; GMD	0.6868	0.5008	0.8264	2.77123e-06	0.1382	0.02	0.2921	0.00873935	0.175	0.113	0.2779	–	0.5078	0.2756	0.6818	4.25235e-05	0.0161	0	0.1368	0.160223	0.4761	0.3118	0.6746	–	0.5001	0.1212	0.6817	0.000997222	0.078	0	0.3181	0.0573497	0.422	0.2794	0.6411	–
white matter MD	Left inferior longitudinal fasciculus	ILF_L	YES; GMD	0.8038	0.6459	0.8962	1.0376e-08	0.0697	0	0.2164	0.0469441	0.1264	0.0849	0.1952	–	0.6468	0.3908	0.8264	9.36639e-08	0.1143	0	0.336	0	0.2389	0.1576	0.3661	–	0.4324	0.1473	0.7087	8.70178e-06	0.1668	0	0.4013	0.0640127	0.4008	0.2572	0.584	–
white matter MD	Right inferior longitudinal fasciculus	ILF_R	YES; GMD	0.8062	0.6611	0.8785	2.20048e-07	0.0161	0	0.1385	0.258543	0.1777	0.1182	0.2751	–	0.6339	0.3927	0.7591	1.04384e-06	0.0033	0	0.1748	0.408505	0.3627	0.2411	0.5256	–	0.5885	0.2358	0.7772	1.76583e-05	0.0697	0	0.3159	0.238899	0.3418	0.2192	0.5371	–
white matter MD	Left superior longitudinal fasciculus	SLF_L	YES; GMD	0.73	0.5646	0.8231	1.65938e-06	0.0248	0	0.1525	0.180817	0.2452	0.166	0.3635	–	0.5794	0.3478	0.8312	6.49807e-06	0.1909	0.0171	0.385	0.0719366	0.2298	0.146	0.3527	–	0.5958	0.1985	0.7934	0.00113402	0.0945	0	0.3599	0.141081	0.3097	0.1943	0.509	–
white matter MD	Right superior longitudinal fasciculus	SLF_R	YES; GMD	0.7249	0.5511	0.8122	6.29481e-07	0.0123	0	0.156	0.276891	0.2628	0.1846	0.3723	–	0.8198	0.5939	0.8881	6.82162e-07	0.0059	0	0.2025	0.351579	0.1743	0.1116	0.2758	–	0.6807	0.3911	0.8275	1.65431e-05	0.071	0	0.2964	0.136908	0.2483	0.1618	0.3871	–
white matter MD	Left uncinate fasciculus	UNC_L	YES; GMD	0.6538	0.4188	0.7996	0.000120321	0.0865	0.0007	0.2453	0.036706	0.2597	0.1701	0.3984	–	0.5888	0.3402	0.764	0.000157944	0.0662	0	0.227	0.0562409	0.345	0.2154	0.5247	–	0.6041	0.2084	0.7714	0.00189341	0.0374	0	0.2819	0.335699	0.3585	0.2273	0.5736	–
white matter MD	Right uncinate fasciculus	UNC_R	YES; GMD	0.4317	0.0963	0.676	0.00549351	0.1633	0.0002	0.3802	0.0474199	0.405	0.2789	0.5815	–	0.5957	0.3832	0.7361	0.000228609	0.0002	NA	0.1226	0.468187	0.4042	0.2638	0.5936	–	0.5099	0.2728	0.6742	0.0002623	0.0537	0	0.2373	0.109247	0.4364	0.3042	0.6085	–
white matter MD	Left superior longitudinal fasciculus (temporal part)	SLFtemp_L	YES; GMD	0.3115	0	0.5848	0.102307	0.1591	0	0.423	0.067125	0.5294	0.3802	0.7252	–	0.152	0	0.5778	0.235163	0.3316	0.0067	0.5472	0.0441435	0.5164	0.3426	0.7001	–	0.0417	0	0.446	0.257558	0.2816	0.0126	0.4294	0.0376568	0.6766	0.473	0.8242	–
white matter MD	Right superior longitudinal fasciculus (temporal part)	SLFtemp_R	YES; GMD	0.3482	0.0966	0.5925	0.00514595	0.1785	0.0089	0.3551	0.0246691	0.4732	0.3418	0.6341	–	0.5252	0.2431	0.7157	0.00308705	0.0066	0	0.139	0.308121	0.4683	0.2807	0.6952	–	0.1737	0.0033	0.5152	0	0.3379	0.0949	0.5005	0.00830889	0.4884	0.3264	0.6468	–

## Sheet: Associations
				Assessment #1 to #2: 10 to 13 years																				Assessment #2 to #3: 13 to 18 years																				Assessment #1 to #3: 10 to 18 years
Brain measure				Phenotypic association					Genetic association					Common environment association					Unique environment association					Phenotypic association					Genetic association					Common environment association					Unique environment association					Phenotypic association					Genetic association
atlas	region	abbreviation	correct global brain	estimate	lower CI	upper CI	p-value (0)	p-value (1)	estimate	lower CI	upper CI	p-value (0)	p-value (1)	estimate	lower CI	upper CI	p-value (0)	p-value (1)	estimate	lower CI	upper CI	p-value (0)	p-value (1)	estimate	lower CI	upper CI	p-value (0)	p-value (1)	estimate	lower CI	upper CI	p-value (0)	p-value (1)	estimate	lower CI	upper CI	p-value (0)	p-value (1)	estimate	lower CI	upper CI	p-value (0)	p-value (1)	estimate	lower CI	upper CI	p-value (0)	p-value (1)	estimate
global	Total brain volume	TBV	NO	0.9397	0.9208	0.954	6.45262e-59	0.00750101	0.9791	0.9601	0.9989	3.08737e-17	0.014562	1	-1	NA	0.694452	1	0.5155	0.258	0.7189	8.95318e-05	9.2058e-25	0.9455	0.9266	0.9592	3.10224e-55	0.0128565	0.9792	0.9524	0.9994	5.72791e-18	0.109232	1	-1	NA	0.694606	1	0.5119	0.1956	0.7423	0.00142447	9.11219e-15	0.9065	0.8787	0.9284	1.90038e-51	3.02213e-11	0.9351
global	Global white matter mean fractional anisotropy	GFA	NO	0.7202	0.633	0.7881	1.05321e-23	5.20974e-32	0.9983	0.9983	1	0.000134257	0	1	NA	NA	0.778259	0	0.098	-0.1959	0.3948	0.5221	0	0.6862	NA	0.7641	8.38424e-18	1.01726e-67	0.9396	0.8894	1	0.000576762	0.64542	1	-1	NA	0.778252	3.34564e-264	0.2929	0.0015	0.5511	0.0485107	0	0.6499	0.5568	0.7266	2.54794e-19	2.3025e-38	0.958
global	Global white matter mean diffusivity	GMD	NO	0.7187	0.6247	0.7885	1.15137e-18	8.23616e-151	0.9905	NA	1	2.08119e-06	7.79188e-06	-0.6413	-1	NA	0.476593	0.000210769	0.4238	0.1464	0.6484	0.00336097	2.4509e-64	0.6901	0.5833	0.7696	8.82747e-16	1.67153e-58	0.9861	0.8144	1	0.000124571	0.828816	0.3489	-1	0.9998	0.587918	4.53387e-78	0.5373	0.2882	0.7074	9.0055e-05	4.87302e-286	0.6758	0.579	0.7517	1.95368e-17	1.19952e-32	0.9538
global	Total cortical gray matter volume	CGM	YES; TBV	0.5413	0.43	0.6383	7.55529e-15	1.52882e-41	1	0.68	NA	1.39441e-06	1	1	-0.1475	NA	0.681217	0.99998	-0.2049	-0.4693	0.1247	0.21561	1.81494e-45	0.6958	0.5959	0.7737	1.21121e-18	3.45156e-24	1	0.9167	NA	1.14463e-06	1	1	-1	NA	0.453051	1	0.1642	-0.1389	0.4477	0.270865	3.31768e-28	0.5259	0.4135	0.624	1.31117e-15	5.08413e-38	1
global	Total subcortical gray matter volume	SGM	YES; TBV	0.8283	0.774	0.871	1.02002e-35	5.95083e-15	0.989	0.9783	1	8.21364e-05	0.518677	1	-1	NA	0.293851	1	0.499	0.2851	0.684	1.66253e-05	4.66355e-23	0.8566	0.8059	0.8942	5.50742e-33	9.95176e-12	0.9221	0.8172	1	9.13325e-05	0.312219	1	-1	NA	0.230181	1	0.6174	0.3378	0.7914	4.21614e-05	1.74935e-11	0.8084	0.7533	0.8531	5.69029e-38	6.07622e-22	0.9691
global	Total cortical white matter volume	WMV	YES; TBV	0.6117	0.5103	0.6982	4.38304e-17	9.94902e-36	0.9955	0.945	NA	2.38845e-07	0.886398	1	-1	NA	0.443702	0.999986	-0.18	-0.4485	0.1431	0.25986	1.57725e-43	0.7563	0.6671	0.8236	2.22049e-20	3.37717e-20	0.929	0.929	1	6.66971e-08	0.62979	1	-1	NA	0.266544	1	0.1605	-0.1876	0.4511	0.36627	1.14925e-27	0.5534	0.4358	0.6537	2.07765e-12	3.496e-47	0.8899
subcortical	Left putamen	PUT_L	YES; TBV	0.8133	0.7595	0.8568	9.17802e-39	3.97758e-20	0.9995	0.9855	NA	2.36115e-08	0.929136	1	-1	NA	0.369807	0.369807	0.1612	-0.1059	0.4115	0.362474	8.26054e-38	0.8628	0.8193	0.8965	7.93918e-41	9.70937e-13	0.9956	0.9859	NA	2.45397e-08	0.929136	1	NA	NA	0.369807	0.860516	0.505	0.3112	0.6847	6.43171e-06	4.88237e-28	0.7864	0.7289	0.8341	7.24098e-38	1.44747e-23	0.9981
subcortical	Left hippocampus	HIP_L	YES; TBV	0.8173	0.7644	0.8591	8.62303e-38	6.96767e-19	0.9917	0.9917	NA	0.000740274	0.547826	0.5186	-1	NA	1	0.999972	0.5884	0.4045	0.7475	3.22491e-08	9.64889e-14	0.7503	0.676	0.8085	2.38503e-29	2.40639e-24	0.9648	0.9518	NA	0.000328409	0.371098	-0.9629	NA	1	0.999997	0.999954	0.3475	0.0792	0.5846	0.0103693	1.1081e-26	0.6606	0.5777	0.7298	7.1497e-25	1.84901e-36	0.9229
subcortical	Left amygdala	AMY_L	YES; TBV	0.6685	0.5787	0.7416	2.88075e-21	3.07328e-35	0.9986	-1	NA	0.0856146	0.964188	0.7087	-1	1	0.473282	0.474144	0.4348	0.1992	0.6282	0.000459404	6.77152e-36	0.6829	0.5881	0.7573	5.01547e-19	8.39782e-35	0.9907	-1	1	0.138189	0.96677	1	-1	NA	0.332095	0.994407	0.5024	0.2743	0.6706	5.78997e-05	1.43957e-43	0.6808	0.6033	0.7454	2.23089e-25	1.92502e-38	0.9822
subcortical	Right putamen	PUT_R	YES; TBV	0.884	0.8474	0.9123	3.35049e-44	5.10576e-10	0.9998	0.9588	NA	7.805e-08	0.938331	0.9706	-1	1	0.380002	0.920259	0.4542	0.1955	0.6673	0.00268823	5.58841e-26	0.8551	0.8082	0.8916	2.36451e-38	1.07861e-11	0.9848	0.8999	NA	6.03935e-08	0.64156	0.9945	-1	NA	0.34075	0.96157	0.326	0.0278	0.5876	0.0318975	3.48105e-18	0.8286	0.7808	0.8676	2.00615e-41	1.84051e-17	0.9815
subcortical	Right hippocampus	HIP_R	YES; TBV	0.8089	0.7515	0.8539	4.17096e-35	4.27721e-20	0.9981	0.9981	NA	9.47285e-06	0.862366	-1	NA	1	0.923631	0.923567	0.4519	0.2127	0.6568	0.000258094	1.0061e-25	0.8367	0.7814	0.8781	2.2212e-32	1.69104e-14	0.9876	0.9455	NA	9.35925e-06	0.765401	1	-1	NA	0.923704	1	0.4595	0.2107	0.662	0.000316789	7.29849e-20	0.7366	0.6685	0.7927	5.12091e-31	8.02288e-44	0.9954
subcortical	Right amygdala	AMY_R	YES; TBV	0.7211	0.6439	0.7831	1.85438e-26	8.51935e-34	0.9096	0.8362	1	0.0038603	0.337411	0.2393	-1	1	1	0.999815	0.538	0.3239	0.6958	7.62081e-06	2.93245e-42	0.7454	0.6685	0.8052	2.19758e-26	1.13067e-31	0.9674	0.9674	1	0.0101182	0.337415	0.9952	-1	NA	1	0.999524	0.5466	0.3454	0.6964	2.67345e-06	4.27875e-26	0.6324	0.5414	0.7079	6.00788e-20	4.85101e-48	0.7747
temporal cortex	Left banks of superior temporal gyrus	Bank_L	YES; TBV	0.8012	0.7464	0.8446	1.27082e-36	7.48832e-26	1	0.9891	NA	0.0075511	1	1	NA	NA	0.883177	1	0.7074	0.5762	0.8033	3.12972e-13	1.59235e-19	0.829	0.7765	0.8694	6.34902e-35	1.31188e-17	1	0.8683	NA	0.00725134	1	1	-1	NA	0.858497	1	0.7352	0.5941	0.8345	7.9192e-12	1.72131e-13	0.7581	0.6975	0.808	7.59022e-37	4.38409e-31	1
anterior cingulum	Left caudal anterior cingulate cortex	ACc_L	YES; TBV	0.8955	0.8659	0.9186	8.46649e-50	7.37286e-10	0.9592	-1	1	0.065141	0.43567	0.1168	-1	1	1	0.999964	0.8631	0.7852	0.9163	6.95556e-31	1.26104e-16	0.9293	0.9069	0.9461	1.00816e-52	0.00437428	0.9958	-1	NA	0.0576103	0.703208	0.8085	-1	1	1	0.999947	0.9183	0.8754	0.9488	2.53588e-41	7.27256e-08	0.9087	0.8843	0.928	4.52637e-58	5.01064e-08	0.9811
frontal cortex	Left caudal middle frontal gyrus	cMFG_L	YES; TBV	0.8673	0.8284	0.8974	1.2142e-39	8.07353e-13	0.8631	-1	1	0.596186	0.728153	1	-1	NA	0.139469	1	0.8498	0.7564	0.9053	7.65656e-25	2.06976e-06	0.8448	0.798	0.8808	1.48178e-37	1.25259e-15	0.9988	-1	NA	0.614863	0.978854	1	-1	NA	0.161732	1	0.7971	0.6957	0.8737	3.99289e-22	1.03989e-09	0.8141	0.765	0.8536	1.46873e-38	1.1617e-21	0.8374
temporal cortex	Left entorhinal gyrus	Ent_L	YES; TBV	0.5396	0.4315	0.6326	1.88505e-15	3.66572e-46	1	-1	NA	0.120041	0.999909	1	0.9844	NA	0.201664	1	0.266	0.0507	0.4547	0.0156047	3.69783e-54	0.6142	0.5063	0.7018	2.44333e-16	1.54229e-52	1	-1	NA	0.120041	1	1	-1	NA	0.207689	1	0.3988	0.1768	0.577	0.000781383	6.90225e-38	0.6248	0.5351	0.7006	8.90049e-20	1.24041e-38	1
temporal cortex	Left fusiform gyrus	FG_L	YES; TBV	0.7494	0.6814	0.8043	2.97525e-29	0	0.88	0.88	1	0.0401405	2.10723e-16	0.3916	NA	1	1	0.99976	0.6822	0.5017	0.8043	3.56295e-09	1.83116e-42	0.7878	0.7201	0.8394	2.04399e-28	9.50042e-31	0.8764	0.8749	1	0.0429614	0.335404	-0.9795	-1	1	0.999996	0	0.7396	0.5646	0.8506	1.10335e-10	1.45043e-30	0.6977	0.6236	0.7596	1.42049e-27	4.46586e-87	0.9645
temporal cortex	Left inferior temporal gyrus	ITG_L	YES; TBV	0.8255	0.7754	0.8649	4.15471e-35	2.04146e-19	0.966	-1	1	0.0660506	0.331051	0.9389	NA	1	0.283469	0.869572	0.7366	0.6029	0.834	5.51759e-16	4.35227e-28	0.8396	0.786	0.8793	1.31e-32	1.81908e-15	0.9841	-0.8791	NA	0.055144	0.555087	0.9038	-1	1	0.403798	0.869572	0.7959	0.671	0.8827	4.75424e-16	2.70076e-17	0.807	0.7554	0.8484	4.96776e-37	3.10418e-28	0.9048
frontal cortex	Left lateral orbitofrontal gyrus	lOFG_L	YES; TBV	0.6254	0.5342	0.7026	8.52129e-21	2.15217e-37	1	1	NA	0.00293661	1	1	-0.9997	NA	0.239967	1	0.3773	0.1824	0.5436	0.000252615	8.83864e-55	0.7656	0.6913	0.8226	7.65511e-29	4.94973e-25	1	0.9975	NA	0.000676769	0.999972	1	-1	NA	0.240201	1	0.4453	0.2125	0.6286	0.000378317	1.37846e-24	0.5493	0.4523	0.635	2.79201e-18	1.62493e-42	1
frontal cortex	Left medial orbitofrontal gyrus	mOFG_L	YES; TBV	0.5261	0.4154	0.6208	6.39231e-15	6.75148e-47	1	0.9996	NA	0.00430508	0.999981	1	-1	NA	0.985844	1	0.2577	0.0289	0.4554	0.0271708	4.64065e-52	0.5216	0.4053	0.6204	5.28905e-12	6.0801e-45	1	0.986	NA	0.00177079	0.999947	-1	NA	1	0.985891	0.985794	0.1706	-0.0637	0.3793	0.14961	2.17054e-64	0.4747	0.3635	0.5725	4.12166e-12	9.34658e-54	1
temporal cortex	Left middle temporal gyrus	MTG_L	YES; TBV	0.771	0.7036	0.8231	3.13613e-29	9.43465e-27	0.7595	-0.5129	0.9982	0.113821	0.0186393	1	-1	NA	0.260742	1	0.7552	0.5886	0.8619	1.4119e-12	8.85203e-26	0.807	0.7445	0.8544	3.29435e-30	1.06772e-20	0.9988	0.8835	NA	0.044945	0.927716	1	-1	NA	0.36194	1	0.6937	0.5333	0.8156	1.97928e-11	2.11807e-32	0.7542	0.6808	0.8104	4.5661e-27	7.87418e-28	0.7266
temporal cortex	Left parahippocampal gyrus	Par_L	YES; TBV	0.7766	0.7136	0.8271	4.34454e-33	3.49891e-23	1	0.9762	NA	0.00243542	0.999998	1	-1	NA	0.679359	1	0.4567	0.2519	0.6415	0.000124231	6.9426e-33	0.7263	0.6465	0.7899	6.9693e-26	6.41853e-35	1	0.9928	NA	0.00292948	1	1	-1	NA	0.594557	1	0.3982	0.15	0.6115	0.00176626	1.28549e-26	0.6818	0.6026	0.7477	8.86864e-25	1.63043e-33	1
frontal cortex	Left pars opercularis	Opr_L	YES; TBV	0.8333	0.7891	0.8691	1.93726e-43	1.71454e-22	1	0.9882	NA	0.0447877	0.999937	-1	NA	1	0.832223	0.832204	0.7594	0.6454	0.8365	1.37619e-16	3.54989e-17	0.876	0.8385	0.9046	1.9674e-44	4.22118e-13	1	0.6939	NA	0.0478293	1	1	-1	NA	0.760649	1	0.8181	0.7255	0.8798	3.19485e-21	7.30012e-14	0.7821	0.7272	0.8272	5.829e-40	1.05896e-28	1
frontal cortex	Left pars orbitalis	Orb_L	YES; TBV	0.6778	0.5963	0.7448	4.70187e-25	1.85947e-35	0.9973	0.9581	NA	0.0305512	0.823685	1	-1	NA	0.906807	0.999972	0.4864	0.3167	0.6287	3.25859e-07	2.20056e-44	0.7352	0.6625	0.7933	9.46547e-28	2.43354e-31	0.966	0.966	NA	0.0375748	0.866683	1	-1	NA	0.957074	1	0.631	0.4868	0.7435	5.17334e-12	1.70852e-24	0.6333	0.5487	0.705	2.03449e-23	8.79952e-42	0.9445
frontal cortex	Left pars triangularis	Tri_L	YES; TBV	0.856	0.8142	0.8886	8.20163e-41	7.84724e-15	0.9958	-1	NA	0.0663691	0.95281	1	-1	NA	0.937858	0.999173	0.7983	0.702	0.8705	4.22454e-23	3.0728e-13	0.8616	0.8192	0.8943	4.05209e-41	4.94795e-15	0.9936	-1	NA	0.0672965	0.953014	1	-1	NA	0.937907	1	0.8012	0.7035	0.8811	4.2168e-24	8.67976e-08	0.8379	0.7949	0.8724	1.14895e-43	3.50273e-19	0.9998
anterior cingulum	Left rostral anterior cingulate gyrus	ACr_L	YES; TBV	0.8018	0.7466	0.8459	9.1922e-37	1.08278e-21	0.8631	-1	1	0.316254	0.607113	1	-1	NA	0.117493	1	0.7087	0.5663	0.8098	6.38313e-14	3.54151e-25	0.8514	0.8057	0.8867	4.70958e-40	5.46146e-14	0.9974	-1	NA	0.186884	0.755083	1	-1	NA	0.117682	1	0.7332	0.6054	0.8236	7.72776e-16	8.68358e-20	0.8041	0.7529	0.8459	8.2848e-40	2.76008e-22	0.8975
frontal cortex	Left rostral middle frontal gyrus	rMFG_L	YES; TBV	0.7423	0.6755	0.7967	1.06978e-32	2.58679e-32	0.9084	NA	1	0.000400375	0.0998622	0.9993	-1	NA	1	1	0.521	0.3243	0.6761	1.99673e-06	2.63291e-31	0.8118	0.7517	0.8577	3.64077e-35	2.8443e-18	0.9953	0.9917	NA	6.66814e-05	0.783448	0.9979	-1	NA	0.999995	0.99993	0.4333	0.1857	0.6267	0.000906332	1.33185e-20	0.6868	0.6106	0.7501	6.59434e-28	2.62638e-38	0.8637
frontal cortex	Left superior frontal gyrus	SFG_L	YES; TBV	0.7468	0.6766	0.8031	4.79837e-29	6.47552e-32	1	-1	NA	0.149966	1	0.8461	-1	1	0.168326	0.456007	0.652	0.4812	0.7742	3.27335e-09	3.31555e-20	0.7266	0.6467	0.7899	2.72128e-24	7.88353e-28	1	-1	NA	0.251606	1	0.8696	-1	1	0.103877	0.456007	0.6026	0.4361	0.7636	4.12611e-09	4.41065e-16	0.7181	0.6463	0.7781	1.61579e-28	3.59749e-29	1
temporal cortex	Left superior temporal gyrus	STG_L	YES; TBV	0.8174	0.7632	0.8595	4.78247e-34	1.74115e-18	0.8861	0.8861	0.9929	0.000605888	0.0209176	1	-1	NA	0.887645	0.000627839	0.6921	0.4885	0.8235	1.62466e-08	4.2138e-21	0.8303	0.7772	0.8711	4.93869e-33	4.18256e-19	0.9759	0.9759	NA	0.000410196	0.802948	1	-1	NA	0.887792	1	0.569	0.3412	0.7487	4.97569e-06	7.24664e-24	0.7724	0.7115	0.8217	4.20829e-34	6.82133e-28	0.8589
frontal cortex	Left frontal pole	FP_L	YES; TBV	0.4633	0.3446	0.5654	7.02503e-10	1.81022e-43	1	-1	NA	0.542783	1	1	-1	NA	0.958998	1	0.4504	0.3055	0.561	5.12063e-06	8.86488e-62	0.4483	0.3199	0.5575	2.28899e-08	5.95241e-55	-1	NA	1	0.317142	0.311523	1	-1	NA	0.959077	1	0.586	0.4086	0.7274	7.47262e-08	6.90298e-22	0.233	0.1053	0.352	0.00371577	1.39294e-72	-1
temporal cortex	Left temporal pole	TP_L	YES; TBV	0.4262	0.3048	0.5331	9.83986e-09	1.09043e-63	0.4549	-0.1043	1	0.145941	0.103291	-1	NA	1	0.682376	0.682072	0.4524	0.2127	0.6387	0.000873925	6.527e-29	0.6589	0.5623	0.7357	6.48317e-19	6.1472e-36	0.9985	NA	NA	0.0902741	0.915662	-1	NA	1	0.682394	0.68198	0.5939	0.4108	0.7297	3.89995e-07	3.18607e-21	0.4392	0.327	0.5379	9.67122e-11	1.95925e-54	0.4061
temporal cortex	Left transverse temporal gyrus	TTG_L	YES; TBV	0.874	0.8372	0.9028	1.63526e-45	9.14788e-12	1	-1	NA	0.0545187	1	1	-1	NA	0.248639	0.999976	0.7697	0.6619	0.8524	1.10591e-19	1.45374e-12	0.8797	0.8422	0.9085	1.21742e-42	1.61871e-28	1	-1	NA	0.0576709	1	1	-1	NA	0.248641	1	0.8028	0.7074	0.8754	9.09416e-23	6.44293e-12	0.8589	0.8206	0.8895	5.28856e-48	1.59397e-14	1
insular cortex	Left insula	Ins_L	YES; TBV	0.7286	0.6573	0.7874	1.03863e-31	3.03041e-28	0.9995	0.9995	NA	0.00786676	0.0124686	1	-1	NA	0.0693575	1	0.4059	0.2142	0.5687	6.30391e-05	1.20307e-28	0.7181	0.6378	0.783	2.17021e-23	3.39302e-30	0.942	0.942	NA	0.0242224	0.857118	1	-1	NA	0.0677574	0.999969	0.4509	0.2467	0.6436	2.28887e-05	1.58303e-21	0.6645	0.5801	0.7357	8.8837e-24	1.32782e-33	0.9518
temporal cortex	Right banks of superior temporal gyrus	Bank_R	YES; TBV	0.815	0.7611	0.8567	2.17487e-34	1.1314e-21	0.5667	-1	1	0.784693	0.5919	1	-1	NA	0.371591	1	0.8173	0.7218	0.8797	5.02865e-22	1.4657e-11	0.7971	0.7354	0.8445	5.30431e-32	3.3465e-23	0.922	-1	1	0.592077	0.460048	1	-1	NA	0.371591	1	0.7503	0.6493	0.8232	8.84394e-21	6.44631e-10	0.7608	0.699	0.8108	2.05727e-30	4.54633e-28	0.2035
anterior cingulum	Right caudal anterior cingulate cortex	ACc_R	YES; TBV	0.9094	0.883	0.9299	2.15482e-52	4.16006e-06	0.9751	-0.9937	1	0.0530402	0.336624	1	-1	NA	0.704142	0.999996	0.8782	0.8075	0.9271	1.04641e-32	7.2051e-06	0.9311	0.9094	0.9474	4.27397e-57	0.0049455	0.9874	-1	1	0.0647474	0.4	1	-1	NA	0.704278	0.999998	0.907	0.8545	0.9417	2.9972e-35	6.2625e-09	0.903	0.8762	0.9241	1.03545e-53	4.17768e-08	0.9277
frontal cortex	Right caudal middle frontal gyrus	cMFG_R	YES; TBV	0.8593	0.8192	0.8907	1.66597e-43	1.28983e-18	1	-0.9956	NA	0.0800642	1	0.9964	-1	NA	1	1	0.7957	0.7055	0.8573	3.53069e-22	9.17363e-17	0.8453	0.799	0.8809	9.29764e-41	1.58365e-16	1	-1	NA	0.0800642	1	0.7682	NA	NA	0.999955	0.999959	0.7976	0.7091	0.8586	4.19662e-19	1.73132e-15	0.8224	0.7768	0.8593	1.84207e-44	2.85566e-22	1
temporal cortex	Right entorhinal gyrus	Ent_R	YES; TBV	0.5199	0.4056	0.6171	2.60435e-12	2.99775e-46	1	-1	NA	0.115613	1	1	-1	NA	0.68602	1	0.334	0.108	0.5198	0.00452978	2.09621e-43	0.5904	0.4821	0.6796	8.48195e-17	8.26428e-40	1	-1	NA	0.106926	1	1	-1	NA	0.75559	1	0.4084	0.1776	0.6023	0.00102819	7.80521e-35	0.5422	0.4393	0.6308	3.23234e-15	3.7103e-55	1
temporal cortex	Right fusiform gyrus	FG_R	YES; TBV	0.6352	0.5455	0.7101	2.04271e-21	2.24773e-73	1	0.9897	NA	0.0163257	0.993088	1	-1	NA	0.946191	0.999999	0.4865	0.3231	0.6229	2.37068e-07	2.34592e-32	0.806	0.7426	0.8536	3.74741e-28	2.98231e-26	1	0.9021	NA	0.0157648	1	-1	NA	1	0.761494	0.714021	0.7657	0.6465	0.8475	1.52938e-15	1.52988e-18	0.6327	0.5443	0.7078	4.45964e-25	2.57811e-38	1
temporal cortex	Right inferior temporal gyrus	ITG_R	YES; TBV	0.7755	0.7108	0.8269	8.1101e-32	2.99433e-24	0.8367	0.8367	1	0.243823	0.382403	1	-1	NA	0.477099	0.999991	0.7076	0.5508	0.8214	9.32445e-14	4.42931e-31	0.803	0.7431	0.8494	4.42412e-35	9.43418e-20	0.9898	-1	1	0.243828	0.787946	1	-1	NA	0.477099	1	0.6855	0.535	0.7931	1.86708e-12	3.08365e-23	0.7855	0.7288	0.8316	6.48282e-38	2.9478e-25	0.9063
frontal cortex	Right lateral orbitofrontal gyrus	lOFG_R	YES; TBV	0.4592	0.3374	0.5651	3.62988e-10	0.0314731	0.9803	0.9803	NA	0.00309773	0.805913	-0.9881	NA	1	0.380592	0	0.1969	-0.0502	0.4262	0.117804	2.99305e-51	0.6513	0.5438	0.7347	9.20066e-15	5.27131e-33	0.9533	0.8807	NA	0.0173036	0.765484	0.0163	-1	1	0.987948	0.61009	0.5721	0.3375	0.7448	3.62611e-05	8.73074e-17	0.4759	0.3665	0.5741	2.35049e-12	9.80312e-47	0.8749
frontal cortex	Right medial orbitofrontal gyrus	mOFG_R	YES; TBV	0.5063	0.3913	0.6045	2.9609e-13	5.33591e-48	1	0.8812	NA	0.0372572	0.999993	1	-1	NA	0.891593	1	0.2945	0.0802	0.4763	0.00788967	3.78867e-46	0.6062	0.4966	0.6945	4.70238e-16	2.00132e-39	1	-1	NA	0.149365	1	1	-1	NA	0.74601	1	0.5159	0.3163	0.6766	3.45787e-06	2.76877e-22	0.4282	0.31	0.5326	1.56331e-09	6.4195e-55	1
temporal cortex	Right middle temporal gyrus	MTG_R	YES; TBV	0.7779	0.7119	0.8311	1.05737e-31	1.2334e-23	0.9699	-0.531	1	0.11896	0.881468	1	0.892	NA	0.00658527	1	0.5503	0.356	0.7085	2.19246e-07	7.80088e-25	0.8454	0.7899	0.887	1.32193e-34	4.90498e-13	0.9922	-1	NA	0.147212	0.787777	1	0.9383	NA	0.00658527	1	0.675	0.5152	0.7781	1.73347e-10	1.25942e-15	0.8001	0.7414	0.8475	1.61939e-35	5.24242e-20	0.9319
temporal cortex	Right parahippocampal gyrus	Par_R	YES; TBV	0.6754	0.59	0.745	2.16917e-22	1.15137e-52	0.9742	-1	NA	0.226365	0.743155	0.982	-1	NA	0.737345	0.870563	0.5385	0.3272	0.7028	1.493e-06	6.86451e-27	0.7325	0.6515	0.7945	9.74868e-23	1.01993e-28	0.9481	-1	NA	0.265412	0.744831	0.586	-1	1	0.771157	0.730368	0.6809	0.5	0.8167	7.01423e-09	2.00041e-18	0.6566	0.5695	0.7278	2.65451e-20	5.99103e-37	0.8518
frontal cortex	Right pars opercularis	Opr_R	YES; TBV	0.8774	0.8421	0.9049	6.76617e-44	6.584e-13	0.9991	-1	NA	0.271274	0.958645	1	-1	NA	0.718471	0.999977	0.8435	0.7734	0.8973	3.84367e-32	4.90473e-07	0.88	0.843	0.9082	1.66393e-43	3.10648e-11	0.9993	-1	NA	0.265031	0.958645	1	-1	NA	0.686456	1	0.8308	0.749	0.8936	3.1892e-27	1.67966e-08	0.8934	0.8643	0.9164	1.12524e-53	5.70947e-10	0.997
frontal cortex	Right pars orbitalis	Orb_R	YES; TBV	0.6571	0.5694	0.7285	2.05764e-22	8.93464e-39	0.9382	-1	1	0.261969	0.863013	1	-1	NA	0.873467	0.999939	0.5984	0.4448	0.7255	2.92089e-10	1.03324e-31	0.7026	0.6141	0.7716	2.10324e-21	2.30707e-34	0.9999	-1	NA	0.262147	0.981869	1	-1	NA	0.639748	0.999985	0.6246	0.4731	0.7352	1.70776e-09	2.16199e-30	0.6484	0.5659	0.7174	5.23937e-26	6.65735e-43	0.942
frontal cortex	Right pars triangularis	Tri_R	YES; TBV	0.8512	0.8076	0.8848	3.74858e-40	1.33327e-17	0.9122	-1	1	0.230603	0.104129	-0.0393	-1	NA	1	1	0.8444	0.769	0.8993	2.79477e-27	1.10861e-09	0.8632	0.8223	0.8949	2.44758e-39	1.27944e-13	0.9736	-1	NA	0.104181	0.519388	-0.6226	NA	NA	1	0.999904	0.8277	0.7508	0.884	7.85084e-25	8.29908e-22	0.8384	0.7958	0.8722	1.7097e-39	1.5046e-23	0.7946
anterior cingulum	Right rostral anterior cingulate gyrus	ACr_R	YES; TBV	0.8303	0.7838	0.8668	1.51015e-38	1.26212e-21	1	NA	NA	0.520821	1	1	-1	NA	0.631002	1	0.8322	0.765	0.8807	3.8164e-30	2.40034e-10	0.848	0.8033	0.8826	4.62165e-41	3.82258e-18	1	-1	NA	0.74044	1	1	-1	NA	0.631096	1	0.8529	0.7916	0.9031	2.34868e-32	5.0351e-09	0.7929	0.7412	0.8347	5.34293e-38	3.71774e-30	1
frontal cortex	Right rostral middle frontal gyrus	rMFG_R	YES; TBV	0.7388	0.6682	0.7961	4.73863e-30	6.272e-28	-1	NA	1	0.900187	0.900183	1	NA	NA	0.0821557	1	0.7366	0.6265	0.8183	1.7174e-18	9.48223e-20	0.7939	0.7326	0.8422	2.7818e-31	2.12309e-20	1	-1	NA	0.22749	0.991235	1	-1	NA	0.0821557	1	0.7187	0.6169	0.7961	7.94683e-19	1.18608e-16	0.8143	0.7627	0.8557	6.67847e-39	3.17249e-19	-1
frontal cortex	Right superior frontal gyrus	SFG_R	YES; TBV	0.7088	0.6302	0.7729	3.3703e-27	5.02713e-33	1	0.9998	NA	0.011661	0.999915	-1	NA	1	0.914908	0.914708	0.5505	0.3662	0.7021	4.36096e-07	2.29884e-23	0.8027	0.741	0.8506	5.1476e-32	3.96209e-20	1	0.9492	NA	0.0116611	1	1	-1	NA	0.959054	0.999981	0.6693	0.5071	0.7948	3.7047e-09	4.86877e-11	0.6852	0.6047	0.7523	4.94907e-30	1.5314e-37	1
temporal cortex	Right superior temporal gyrus	STG_R	YES; TBV	0.7389	0.6613	0.8003	4.92821e-28	1.27219e-29	0.9788	0.8899	NA	0.00442019	0.63378	1	-1	NA	0.821218	1	0.4433	0.2135	0.6416	0.000203772	2.53149e-45	0.7929	0.7289	0.8429	1.41992e-29	8.46143e-21	1	0.9713	NA	0.00543269	0.987755	1	-1	NA	0.821303	1	0.5976	0.4244	0.7309	4.61746e-09	7.50296e-29	0.795	0.7386	0.8407	3.26626e-34	7.37567e-21	0.9778
frontal cortex	Right frontal pole	FP_R	YES; TBV	0.3237	0.1935	0.4415	2.88627e-06	5.77509e-69	1	-1	NA	0.205162	1	-1	NA	1	0.921962	0.921962	0.2322	0.0434	0.4151	0.0157909	7.96069e-65	0.2891	0.1432	0.4211	0.000388703	6.55782e-58	1	-1	NA	0.148618	1	-1	NA	1	0.921962	0.921962	0.1153	-0.1086	0.3323	0.307185	5.30441e-69	0.1279	-0.0015	0.253	0.0551516	5.15682e-77	1
temporal cortex	Right temporal pole	TP_R	YES; TBV	0.3356	0.1932	0.4629	1.07283e-05	4.04761e-55	0.6912	0.6912	1	0.0757825	0.131991	0.7323	-1	1	1	0.999935	0.1792	-0.0674	0.4113	0.153783	3.94491e-61	0.4098	0.2695	0.5315	7.7467e-07	2.72843e-48	0.5537	0.5537	1	0.0676763	0.134248	-0.0861	-1	0.9999	1	0.999805	0.2794	-0.0428	0.5402	0.085876	1.96533e-29	0.442	0.3277	0.544	6.2685e-10	7.23562e-52	0.9845
temporal cortex	Right transverse temporal gyrus	TTG_R	YES; TBV	0.8227	0.7723	0.8622	2.15614e-37	3.33526e-20	1	-1	NA	0.185155	0.987837	1	-1	NA	0.593683	1	0.761	0.6489	0.829	1.87273e-19	5.23973e-20	0.794	0.7328	0.8417	7.21934e-32	3.64431e-22	0.984	-1	NA	0.166081	0.966794	1	-1	NA	0.593683	1	0.7114	0.56	0.8162	1.22407e-13	6.8471e-19	0.7954	0.7431	0.8377	3.94032e-36	5.74229e-25	0.9829
insular cortex	Right insula	Ins_R	YES; TBV	0.5829	0.4824	0.6675	3.89421e-17	5.66609e-45	0.8881	-1	NA	0.674446	0.459816	1	-1	NA	0.298723	1	0.4812	0.275	0.6242	1.07568e-05	5.47518e-39	0.5835	0.4741	0.6732	1.21789e-16	2.80974e-40	0.9998	-1	NA	0.459823	0.985487	1	-1	NA	0.298728	1	0.4402	0.2364	0.5928	5.59606e-05	6.3647e-41	0.5458	0.4468	0.6319	2.23695e-16	9.39381e-45	0.8786
white matter FA	Left anterior thalamic radiation	ATR_L	YES; GFA	0.7552	0.6806	0.812	4.46226e-30	3.12614e-59	0.9998	0.9804	NA	0.000225219	0	1	NA	NA	0.748671	0	0.2312	-0.0594	0.488	0.117757	2.8198e-141	0.7488	0.6665	0.8116	5.46349e-22	0	0.9638	0.9145	1	0.000791402	0	1	NA	NA	0.748602	0.210764	0.4055	0.1181	0.6422	0.00545733	0	0.6825	0.5975	0.7514	2.75984e-22	1.9821e-88	0.9687
white matter FA	Right anterior thalamic radiation	ATR_R	YES; GFA	0.816	0.7554	0.8626	1.11857e-31	3.63072e-45	0.9989	0.9897	1	0.000458874	0	0.9938	-1	NA	0.175649	0.180907	0.335	0.0722	0.5684	0.0126101	0	0.7579	0.6747	0.8202	1.14841e-21	0	0.9516	0.8737	1	0	0	0.7307	-1	1	0.18944	0	0.5268	0.2965	0.7086	1.60923e-05	0	0.7178	0.6379	0.7815	4.72511e-23	7.2403e-198	0.9649
white matter FA	Left corticospinal tract	CST_L	YES; GFA	0.6797	0.5866	0.754	3.51172e-21	3.30634e-35	0.9877	NA	1	3.82673e-05	0	0.9697	NA	NA	0.778862	0	0.0725	-0.2182	0.372	0.63611	0	0.7325	0.6445	0.8002	2.16868e-22	0	0.9228	0.7244	1	4.73323e-05	0.00010959	0.9815	-1	NA	0.778863	0	0.3237	0.0318	0.5995	0.0288877	1.02329e-93	0.678	0.5944	0.7472	0	1.16434e-34	0.8511
white matter FA	right corticospinal tract	CST_R	YES; GFA	0.6741	0.5805	0.7495	1.76707e-21	7.70047e-227	0.9215	NA	1	4.00704e-06	0.114166	1	-1	NA	0.259795	0	-0.0726	-0.3927	0.2783	0.688968	9.50215e-273	0.7543	0.6692	0.8184	2.75762e-22	1.92385e-42	0.9632	0.8397	1	0	3.4293e-143	1	NA	NA	0.258708	0.999837	0.2676	-0.0364	0.5433	0.0837027	0	0.6643	0.5741	0.7372	2.52684e-21	2.27922e-41	0.7831
white matter FA	Left cingulum (cingulate gyrus)	CGC_L	YES; GFA	0.8397	0.7869	0.8794	3.33121e-31	0	1	NA	NA	0.0316272	0	0.9529	-1	1	0.187638	5.2908e-237	0.7231	0.584	0.8221	2.19855e-12	0	0.8271	0.7673	0.8714	0	9.79341e-18	1	NA	NA	0.0404097	0	0.8329	-1	1	0.0758954	0.218812	0.7418	0.6083	0.8375	2.52444e-12	0	0.7879	0.7269	0.8358	4.67728e-30	2.74262e-22	1
white matter FA	Right cingulum (cingulate gyrus)	CGC_R	YES; GFA	0.8692	0.8274	0.901	3.225e-41	0	1	NA	NA	0.000882401	0	-0.4562	-1	1	0.962222	0	0.7066	0.5403	0.8191	5.99592e-11	0	0.8619	0.8154	0.897	1.86601e-36	5.44177e-14	1	0.9732	NA	0.00120677	1	0.362	-1	1	0.897469	5.39733e-265	0.7167	0.5393	0.8382	4.68655e-10	3.15421e-53	0.8365	0.7908	0.872	3.01125e-40	0	1
white matter FA	Left cingulum (hippocampus)	CGH_L	YES; GFA	0.7922	0.7291	0.8412	2.14902e-31	0	0.9865	0.9805	1	0.00194983	0	1	-1	NA	0.855545	0	0.5439	0.3415	0.7183	1.69352e-06	1.98364e-51	0.73	0.6514	0.7924	5.44971e-25	0	0.8463	0.5506	1	0.00545043	0.139696	1	-1	NA	0.855544	5.92993e-08	0.5583	0.2775	0.7531	0	0	0.6141	0.5211	0.6927	9.40599e-20	0	0.9141
white matter FA	Right cingulum (hippocampus)	CGH_R	YES; GFA	0.7445	0.6681	0.804	3.64179e-25	9.2588e-196	0.9991	0.9957	NA	0.00277824	0.415056	-1	NA	1	0.683323	0.0234271	0.5614	0.3799	0.707	1.28527e-07	0	0.719	0.6288	0.7859	2.14274e-20	6.69129e-39	0.9997	0.925	NA	0.0041787	0	-1	NA	1	0.55935	2.21125e-68	0.6608	0.5006	0.7743	3.54004e-10	3.52908e-81	0.6728	0.5879	0.7425	9.86891e-24	6.63185e-54	0.9978
white matter FA	Forceps major	Fmajor	YES; GFA	0.7662	0.6895	0.824	2.96788e-24	0	0.9372	0.9372	1	0.0020206	0	1	-1	NA	0.748764	0	0.5424	0.315	0.7142	1.24392e-05	0	0.7525	0.6745	0.8124	1.14829e-23	5.04093e-25	0.8624	0.8624	1	0.00360991	0.205142	1	-1	NA	0.749188	1.72675e-33	0.6519	0.4324	0.7987	3.87109e-07	3.19778e-158	0.7375	0.6664	0.7962	1.25954e-27	0	0.9848
white matter FA	Forceps minor	Fminor	YES; GFA	0.6877	0.5965	0.7607	3.12367e-21	0	0.9448	0.8614	1	0.0127504	0	0.9272	0.7303	1	0.212692	3.25791e-219	0.3177	0.0196	0.5779	0.0363777	0	0.6756	0.5708	0.7556	0	0	0.9918	0.8981	NA	0.0125408	0	0.437	-1	1	0.408624	0	0.4261	0.1542	0.6553	0.00264016	0	0.6496	0.5554	0.7257	5.92897e-18	0	0.895
white matter FA	Left inferior fronto-occipital fasciculus	IFOF_L	YES; GFA	0.7873	0.7155	0.8414	1.40366e-27	5.5486e-39	0.999	0.9358	NA	0	0.887114	1	-1	NA	0.655734	0	0.4402	0.2027	0.6281	0.000446158	0	0.6788	0.5807	0.7557	1.67827e-19	3.04176e-1770.9752	0.7464	1	0.0002424	0	-1	NA	1	0.699196	0.682322	0.2615	-0.0605	0.5459	0.111554	1.82804e-303	0.6754	0.5888	0.7455	1.07556e-22	0	0.9841	NA
white matter FA	Right inferior fronto-occipital fasciculus	IFOF_R	YES; GFA	0.7382	0.6561	0.8023	5.21318e-27	1.33851e-29	0.9974	NA	1	0	0	1	-1	NA	0.900964	1	0.4117	0.1656	0.607	0.00143447	0	0.7132	0.625	0.7819	5.05561e-21	2.07456e-185	0.9598	NA	1	0.00213149	0.830545	-1	NA	1	0	0.745294	0.4068	0.1391	0.6283	0.00324188	2.84767e-84	0.6896	0.6072	0.7571	4.28446e-25	9.06672e-318	0.9775
white matter FA	Left inferior longitudinal fasciculus	ILF_L	YES; GFA	0.7504	0.6709	0.8114	8.88283e-25	2.93588e-52	1	NA	NA	0.00057248	0	1	-1	NA	0.744143	0	0.4226	0.2002	0.6122	0.000304109	0	0.7002	0.6085	0.7724	3.15232e-21	0	1	0.6612	NA	0.00263536	1	1	-1	NA	0	0	0.482	0.2472	0.6847	0.000172833	0	0.6683	0.5846	0.7376	9.3984e-25	0	1
white matter FA	Right inferior longitudinal fasciculus	ILF_R	YES; GFA	0.7452	0.667	0.8059	4.71841e-26	0	1	NA	NA	0.000151439	0	1	-0.2304	NA	0	8.34537e-222	0.2703	-0.0144	0.5201	0.0625654	0	0.7629	0.6828	0.8229	1.82647e-23	6.13461e-57	1	0.9738	NA	0.00117604	0.865888	1	-1	NA	0.64337	0.999998	0.6211	0.4314	0.767	8.2625e-08	0	0.7059	0.6277	0.7698	4.50136e-26	4.7546e-35	1
white matter FA	Left superior longitudinal fasciculus	SLF_L	YES; GFA	0.7599	0.685	0.8178	5.92353e-293	0	1	NA	NA	0.000711962	1.35682e-212	0.8255	-1	1	0.488282	0	0.3811	0.1015	0.6041	0	0	0.6934	0.5866	0.7734	0	7.7193e-307	1	0.7962	NA	0.00894595	0.000817848	0.5427	-1	1	0	0.30876	0.567	0.2958	0.7574	0.000110915	0	0.6416	0.5481	0.718	1.69912e-17	0	1
white matter FA	Right superior longitudinal fasciculus	SLF_R	YES; GFA	0.8307	0.771	0.8749	8.47711e-28	4.50644e-57	1	0.9054	NA	5.53418e-06	1.0279e-76	0.992	0.9153	NA	0	0.810094	0.3636	0.0916	0.5925	0	3.97895e-247	0.7622	0.6753	0.8267	0	5.53396e-96	1	0.9621	NA	8.94978e-06	0.999963	0.5525	-1	1	0.299463	0	0.3184	0.0159	0.5677	0.0393808	1.50614e-149	0.7561	0.6842	0.8128	0	2.16004e-35	1
white matter FA	Left uncinate fasciculus	UNC_L	YES; GFA	0.8489	0.7974	0.8871	1.23513e-38	6.23771e-56	0.9998	0.9988	NA	5.56513e-06	5.63588e-06	0.4847	-1	1	0.999786	0	0.3976	0.1255	0.6217	0.00453028	0	0.7439	0.6598	0.8074	0	5.62267e-48	0.8443	0.7002	1	0.000149717	4.24892e-06	0.5331	-1	NA	0.999934	2.33606e-288	0.5179	0.1856	0.7403	0.00311218	4.22243e-59	0.7197	0.6405	0.7817	1.86429e-25	0	0.8536
white matter FA	Right uncinate fasciculus	UNC_R	YES; GFA	0.814	0.7551	0.859	7.74037e-33	0	1	1	NA	5.02473e-05	1	1	-1	NA	0.545129	1	0.4284	0.1875	0.6165	0.000804455	0	0.7609	0.6829	0.8205	3.98069e-25	2.14792e-269	1	0.8243	NA	0.000207671	0.981894	1	-1	NA	0	1.645e-72	0.454	0.2122	0.6452	0.00104677	3.00108e-106	0.7559	0.6902	0.8094	8.85507e-31	0	1
white matter FA	Left superior longitudinal fasciculus (temporal part)	SLFtemp_L	YES; GFA	0.8222	0.7712	0.862	3.30964e-38	5.39786e-61	1	-1	NA	0.781593	0.992776	1	0.9972	NA	0.0294447	1.88091e-185	0.8068	0.7431	0.8648	1.38579e-32	1.06692e-85	0.8369	0.7869	0.8748	2.57668e-36	0	1	-1	NA	0.781854	0.781308	1	NA	NA	0.0411843	0.454121	0.8636	0.7841	0.9202	0	2.23032e-35	0.8356	0.7915	0.8704	0	2.92661e-27	1
white matter FA	Right superior longitudinal fasciculus (temporal part)	SLFtemp_R	YES; GFA	0.8609	0.8183	0.8933	3.41085e-39	0	1	-1	NA	0.0678267	0	0.3216	-1	1	0.847532	0.445335	0.8423	0.7641	0.899	6.61303e-28	0	0.891	0.8546	0.9172	6.79941e-40	1.19276e-67	1	-1	NA	0.0679694	1	0.6827	-1	1	0.592549	0.27494	0.8684	0.7956	0.921	9.07473e-28	1.14321e-54	0.8367	0.7912	0.8719	5.57728e-39	0	1
white matter MD	Left anterior thalamic radiation	ATR_L	YES; GMD	0.7004	0.6044	0.7735	3.28474e-18	5.98342e-101	0.941	0.941	1	0.00144102	0	-0.6461	NA	1	0.389229	0.0585311	0.6431	0.4337	0.7827	5.64848e-07	3.49355e-153	0.6844	0.583	0.7615	3.75598e-17	1.75755e-33	0.9947	0.9629	1	0.00214377	0	-0.6772	-1	1	0.370678	5.92998e-152	0.5352	0.265	0.7175	0.000364932	0	0.6813	0.588	0.7525	7.43892e-18	0	0.9011
white matter MD	Right anterior thalamic radiation	ATR_R	YES; GMD	0.6511	0.5362	0.738	3.3233e-14	1.41598e-156	0.9671	0.8591	1	0.00180272	0.773092	-0.9272	NA	1	0.357741	2.84345e-174	0.6873	0.5145	0.8179	7.0168e-11	2.58525e-56	0.6987	0.5982	0.7738	6.57317e-17	1.49543e-60	1	NA	NA	0.00284296	0.953608	-0.6756	-1	0.9109	0.546795	0	0.6894	0.5274	0.7992	2.58872e-10	7.3529e-34	0.6812	0.5832	0.7571	2.31277e-17	0	0.9665
white matter MD	Left corticospinal tract	CST_L	YES; GMD	0.6169	0.509	0.7046	0	0	0.9965	0.9965	NA	0.00022795	0	0.2351	NA	1	0.999949	0	0.0077	-0.2687	0.2958	0.959076	0	0.636	0.519	0.7261	4.72058e-15	0	0.7178	0.6407	0.9731	0.000805536	0.000181992	0.6585	NA	NA	0.999977	0	0.4314	0.1318	0.661	0.00583942	5.44192e-263	0.5599	0.4547	0.6477	5.60032e-16	0	0.7737
white matter MD	right corticospinal tract	CST_R	YES; GMD	0.6856	0.5914	0.7596	4.1466e-21	1.74991e-150	1	NA	NA	0.000511814	0	0.874	NA	1	0.988042	4.08831e-278	0.1889	-0.0643	0.4293	0.143209	0	0.6371	0.5236	0.7258	0	0	0.72	0.6717	0.9271	0.00134889	0	0.0637	-1	NA	0.999563	0	0.4686	0.1744	0.6832	0.00251467	0	0.5734	0.4635	0.6635	6.99775e-15	1.0657e-40	0.7158
white matter MD	Left cingulum (cingulate gyrus)	CGC_L	YES; GMD	0.7258	0.643	0.7913	1.87686e-22	3.83778e-29	0.9955	0.7972	1	0.00235078	0.706839	0.8281	0.7577	1	0.185583	0.548439	0.2681	-0.0057	0.5142	0.0547738	1.47319e-169	0.6678	0.5625	0.7509	4.04705e-17	1.31672e-33	0.7719	0.3651	1	0.0150911	0.0574999	0.9196	-1	1	0.183931	0.663903	0.3837	0.0958	0.6178	0.00926714	2.09387e-88	0.6402	0.5387	0.723	3.44231e-17	4.1593e-50	0.7082
white matter MD	Right cingulum (cingulate gyrus)	CGC_R	YES; GMD	0.7218	0.6362	0.7882	4.35063e-22	0	0.8704	0.8704	1	3.73352e-05	0.320679	0.5252	-1	1	0	0	0.3161	-0.0072	0.5797	0	0	0.706	0.6113	0.7732	4.46793e-20	8.84526e-55	0.9493	0.9493	1	0.000184748	0	0.9023	-1	NA	0.45462	1.65034e-261	0.3288	0.0185	0.5904	0	6.69051e-114	0.6551	0.5649	0.7291	1.43588e-29	1.31021e-47	0.981
white matter MD	Left cingulum (hippocampus)	CGH_L	YES; GMD	0.5576	0.4326	0.6587	3.63098e-12	0	0.6904	NA	1	0.00444146	0	1	-1	NA	0.991081	0.859133	0.3482	-0.0068	0.6148	0.0529036	0	0.5595	0.4319	0.6613	4.93785e-12	1.36907e-304	0.9337	0.9337	NA	0.00369385	0	1	-1	NA	0.991096	0.0192843	0.1883	-0.1171	0.4863	0.227675	0	0.5157	0.4029	0.6128	2.06675e-13	0	0.9036
white matter MD	Right cingulum (hippocampus)	CGH_R	YES; GMD	0.5423	0.4175	0.6465	3.61324e-12	0	0.8821	NA	1	0.00135843	0	-1	NA	1	0.870018	0.869829	0.1436	-0.2267	0.4689	0.452452	0	0.5394	0.4083	0.6467	6.30173e-11	2.3818e-264	0.9918	NA	1	0.0118599	0	-1	NA	1	0.870037	2.81845e-80	0.2949	0.0201	0.5738	0.0348725	0	0.56	0.4468	0.6551	3.41096e-14	0	0.8146
white matter MD	Forceps major	Fmajor	YES; GMD	0.9052	0.874	0.9289	0	0	0.9848	0.9848	1	0	0	0.9834	0.8814	NA	0	0.522264	0.8093	0.6982	0.8842	0	0	0.9113	0.8793	0.9348	0	0	0.9571	0.9571	1	0	0.00682128	0.9619	0.9294	1	0	0.52228	0.8245	0.7228	0.8916	0	0	0.882	0.8463	0.9099	0	0	0.8923
white matter MD	Forceps minor	Fminor	YES; GMD	0.5117	0.3695	0.6249	0	0	1	0.9879	NA	3.73872e-05	1	-0.986	NA	-0.0314	0.040081	2.03668e-135	0.4878	0.2364	0.6839	0.000329781	0	0.5692	0.4377	0.671	8.29055e-11	5.36764e-64	1	NA	NA	0.000551061	0	-0.2446	-1	0.9999	0.705927	6.63468e-129	0.3416	0.0549	0.5743	0.020416	0	0.602	0.4943	0.6883	1.0927e-14	0	1
white matter MD	Left inferior fronto-occipital fasciculus	IFOF_L	YES; GMD	0.6102	0.4869	0.7049	8.81965e-13	2.13388e-59	0.9017	0.7497	1	9.24538e-09	7.4752e-197	-0.9997	NA	NA	0.0545944	1.72842e-116	0.327	-0.0433	0.6209	0.0825744	2.63177e-241	0.533	0.3949	0.6422	9.53165e-10	0	0.9987	0.7621	1	0	6.54934e-164	-0.631	-1	NA	0.35196	0.0284743	0.1776	-0.1289	0.4625	0.260381	0	0.6301	0.5268	0.7131	5.03191e-16	0	0.8789
white matter MD	Right inferior fronto-occipital fasciculus	IFOF_R	YES; GMD	0.6535	0.5504	0.7346	5.4801e-17	0	0.9103	0.9103	1	8.5047e-05	0	-1	NA	NA	0.320445	0.318476	0.5651	0.3094	0.7432	6.6838e-05	1.42469e-122	0.6208	0.5041	0.7123	4.02865e-14	0.9186	NA	1	0.00243412	0.211616	-0.9999	NA	1	0.583808	0	0.4313	0.1764	0.634	0.00143737	4.02616e-110	0.6227	0.5167	0.7076	1.95076e-15	3.43233e-300	0.6726	NA
white matter MD	Left inferior longitudinal fasciculus	ILF_L	YES; GMD	0.6451	0.5363	0.7295	1.91441e-15	4.95211e-110	0.9345	NA	NA	2.19444e-07	0.592372	-0.5685	-1	1	0.529084	1.31643e-185	0.1266	-0.2004	0.4412	0.469479	0	0.5349	0.389	0.647	0	0.8344	0.433	1	0.000384835	0	-0.2539	-1	1	0.786599	0	0.4161	0.1013	0.6548	0.00852188	0	0.6265	0.5277	0.7075	1.31462e-130	0	0.8729	0.6664
white matter MD	Right inferior longitudinal fasciculus	ILF_R	YES; GMD	0.7382	0.6561	0.801	7.31938e-24	1.96338e-26	0.9396	0.9396	1	2.08796e-06	0	-1	NA	1	0.81701	0.517084	0.2906	-0.0009	0.5441	0.0515585	3.20543e-240	0.6351	0.5212	0.724	4.40873e-15	2.2681e-91	0.8944	0.5944	1	0.000172336	0	-1	NA	1	0.817539	1.34608e-27	0.2957	0.0076	0.5516	0.0439406	0	0.65	0.5551	0.7268	1.64735e-19	1.92939e-54	0.8196
white matter MD	Left superior longitudinal fasciculus	SLF_L	YES; GMD	0.7678	0.6968	0.8231	3.48296e-26	0	0.9883	0.9053	1	2.02428e-05	0.461428	0.9855	-1	NA	0.362208	3.13844e-234	0.2409	-0.0538	0.5211	0.110886	0	0.6802	0.5718	0.7617	8.43429e-16	6.2184e-72	0.6347	0.4127	0.9142	0	0	0.9578	-1	1	0.28257	0.885447	0.6698	0.3909	0.8267	5.54133e-05	2.89849e-176	0.618	0.517	0.7012	5.07604e-17	1.98466e-55	0.7451
white matter MD	Right superior longitudinal fasciculus	SLF_R	YES; GMD	0.8085	0.7474	0.8547	1.1627e-29	0	0.9834	0.92	1	1.37688e-06	0	-1	NA	1	0.819224	0.504879	0.2752	-0.0066	0.523	0.0555728	0	0.7286	0.6329	0.7998	8.14658e-19	3.01625e-36	0.9023	0.9023	1	3.3234e-05	0	-1	NA	1	0.761463	0.670002	0.3604	0.0395	0.6165	0.0284558	2.8672e-179	0.6947	0.6056	0.7641	7.64372e-20	0	0.8091
white matter MD	Left uncinate fasciculus	UNC_L	YES; GMD	0.6744	0.5725	0.7526	3.48251e-16	1.6537e-150	0.9871	0.9871	NA	0.000317745	0.664724	-0.9926	-1	1	0.206379	0	0.458	0.2105	0.6764	0.000400364	0	0.6432	0.5271	0.733	1.83956e-14	1.44974e-34	0.8016	0.8016	1	0.00517342	0	-0.289	NA	1	0.81807	0	0.5104	0.2255	0.7209	0.000596968	0	0.6222	0.5119	0.7093	1.65386e-14	0	0.723
white matter MD	Right uncinate fasciculus	UNC_R	YES; GMD	0.6388	0.5266	0.7253	6.14462e-15	0	0.791	NA	1	0.010987	0	-1	NA	1	0.936374	2.04859e-234	0.6002	0.3673	0.7656	2.93627e-06	1.44818e-106	0.6291	0.5164	0.7186	1.36532e-15	0.9897	NA	1	0.000538404	0.00804118	-1	NA	NA	0.936429	0.0216217	0.2063	-0.0782	0.4612	0.153822	6.68851e-210	0.5783	0.4715	0.6678	8.18864e-320	0	0.6952	NA
white matter MD	Left superior longitudinal fasciculus (temporal part)	SLFtemp_L	YES; GMD	0.5267	0.3904	0.636	9.26752e-10	0	0.5879	-0.9993	1	0.546049	0	0.437	-1	1	0.49516	0	0.5708	0.3018	0.769	0	0	0.4311	0.2726	0.5618	0	0	0.2109	-1	1	0.911343	0	0.4023	-1	1	0.368579	0	0.4929	0.2135	0.6763	0.00110077	0	0.4577	0.336	0.5647	3.90481e-11	1.21773e-49	0.9147
white matter MD	Right superior longitudinal fasciculus (temporal part)	SLFtemp_R	YES; GMD	0.608	0.4954	0.6985	0	3.645e-108	1	0.9826	NA	0.0103416	7.77842e-83	0.3434	-1	1	0.852308	0.0492161	0.3581	0.0846	0.5872	0.0111246	5.27248e-126	0.5052	0.3645	0.6208	3.01345e-09	0	1	-1	NA	0.0648454	3.35398e-58	0.934	-1	NA	0.620194	0.188863	0.3329	0.0444	0.5852	0.0236624	0	0.5337	0.4172	0.6323	1.83396e-13	0	1
[truncated: 14 more columns]

## Sheet: Heritabilities of change scores
				Assessment #1 to #2: 10 to 13 years												Assessment #2 to #3: 13 to 18 years												Assessment #1 to #3: 10 to 18 years
Brain measure				Heritability				Common environment				Unique environment				Heritability				Common environment				Unique environment				Heritability				Common environment				Unique environment
atlas	region	abbreviation	correct global brain	estimate	lower CI	upper CI	p-value	estimate	lower CI	upper CI	p-value	estimate	lower CI	upper CI	p-value	estimate	lower CI	upper CI	p-value	estimate	lower CI	upper CI	p-value	estimate	lower CI	upper CI	p-value	estimate	lower CI	upper CI	p-value	estimate	lower CI	upper CI	p-value	estimate	lower CI	upper CI	p-value
global	Total brain volume	TBV	NO	0.3337	0.0704	0.5851	0.00757515	0.0311	0	0.2239	0.293177	0.6352	0.4146	0.8589	1.64298e-33	0.353	0.0356	0.6502	0.0131385	0.0942	0	0.3385	0.269489	0.5529	0.3475	0.7809	2.77245e-20	0.6384	0.4021	0.7695	0.000801801	0.0092	NA	0.1526	0.338313	0.3525	0.2271	0.5246	5.13572e-20
global	Global white matter mean fractional anisotropy	GFA	NO	0.0041	NA	0.1343	0.392566	0.007	0	0.103	0.094065	0.9889	0.8644	1	0	0.125	0	0.534	0.239643	0.2257	0	0.462	0.103698	0.6493	0.4369	0.8515	5.5914e-39	0.0768	0	0.3828	0.204204	0.1339	0	0.2892	0.0954872	0.7893	0.5801	0.9294	0
global	Global white matter mean diffusivity	GMD	NO	0.093	0.005	0.3428	0.0143103	0.5541	0.3302	0.6855	6.61327e-05	0.3529	0.2491	0.4721	4.87346e-145	0.0192	NA	0.2865	0.339465	0.4656	0.2427	0.6013	0.000386373	0.5152	0.3688	0.6606	0	0.1273	0.0008	0.5346	0.0784675	0.3524	0.0578	0.5253	0.0199252	0.5204	0.3451	0.6725	7.28456e-121
global	Total cortical gray matter volume	CGM	YES; TBV	0.0303	0	0.3805	0.355137	0.1454	0	0.2771	0.138947	0.8243	0.5842	0.9569	9.07033e-30	0.0319	0	0.3726	0.268228	0.1305	0	0.297	0.264459	0.8376	0.5932	0.9725	5.42143e-27	0.0009	NA	0.2085	0.475166	0.0081	0	0.0852	0.457901	0.991	0.791	1	7.88939e-32
global	Total subcortical gray matter volume	SGM	YES; TBV	0.0383	0	0.3192	0.260455	0.0716	0	0.2379	0.256401	0.89	0.6628	0.9995	1.23508e-32	0.3315	0	0.5644	0.154758	0.0003	NA	0.3369	0.479193	0.6682	0.4349	0.942	1.84103e-26	0.1001	0	0.3419	0.188115	0.0581	0	0.208	0.197169	0.8418	0.644	0.9774	3.39121e-37
global	Total cortical white matter volume	WMV	YES; TBV	0.0181	0	0.3201	0.399607	0.1219	0	0.2565	0.156838	0.8601	0.6397	0.9934	1.92859e-32	0.2729	0.0011	0.4986	0.102105	0.0094	NA	0.2616	0.344683	0.7177	0.4982	0.9402	2.40214e-26	0.1884	0	0.4528	0.170876	0.0517	0	0.236	0.295467	0.7599	0.5324	0.9462	1.58809e-23
subcortical	Left putamen	PUT_L	YES; TBV	0.0332	0	0.169	0.271048	0.0061	NA	0.075	0.459527	0.9607	0.8254	1	3.24687e-40	0.0337	0	0.3292	0.360335	0.0225	0	0.1645	0.485145	0.9439	0.6677	NA	2.78836e-27	0.0115	NA	0.1842	0.412382	0.0021	NA	0.0822	0.466976	0.9864	0.8161	NA	3.26651e-41
subcortical	Left hippocampus	HIP_L	YES; TBV	0.0712	0.0034	0.3204	0.134696	0	NA	0.1194	0.5	0.9288	0.6764	0.9966	3.76428e-25	0.0928	0	0.3248	0.20757	0	NA	0.1495	0.499996	0.9072	0.6753	1	7.88353e-36	0.1621	0	0.3926	0.130684	0	NA	0.1067	0.5	0.8379	0.6076	0.9986	3.47044e-26
subcortical	Left amygdala	AMY_L	YES; TBV	0.0076	0	0.2842	0.350726	0.1215	0	0.2702	0.173343	0.8709	0.7021	0.9826	6.99327e-44	0.0306	0	0.242	0.313703	0.0006	NA	0.1337	0.472379	0.9688	0.7542	1	3.40032e-34	0.069	0	0.3842	0.230742	0.1127	0	0.2677	0.206929	0.8184	0.6057	0.9553	1.32859e-39
subcortical	Right putamen	PUT_R	YES; TBV	0.0263	0	0.3077	0.320972	0.0732	0	0.2195	0.281379	0.9005	0.6838	1	1.85583e-35	0.0747	NA	0.3822	0.341783	0.0573	NA	0.2216	0.408678	0.8679	0.6021	1	1.02426e-20	0.0887	NA	0.3307	0.329494	0.0042	0	0.1554	0.460076	0.907	0.6681	1	3.37017e-30
subcortical	Right hippocampus	HIP_R	YES; TBV	0.0334	0	0.2663	0.278875	0.0113	NA	0.1566	0.389815	0.9553	0.7324	1	1.77183e-33	0.054	0	0.3035	0.378036	0.0168	NA	0.1914	0.407107	0.9292	0.6971	1	2.31253e-34	0.0276	0	0.3089	0.289765	0.0365	NA	0.178	0.416688	0.9359	0.6915	1	3.82816e-32
subcortical	Right amygdala	AMY_R	YES; TBV	0.1781	0	0.3666	0.125143	0	NA	0.1827	0.5	0.8219	0.6332	0.9769	3.78078e-39	0.07	0	0.2175	0.173096	0	NA	0.1306	0.499998	0.93	0.7819	0.9991	1.09563e-56	0.3213	0	0.5109	0.154886	0	NA	0.2816	0.5	0.6787	0.4877	0.9194	4.56012e-31
temporal cortex	Left banks of superior temporal gyrus	Bank_L	YES; TBV	0.0002	NA	0.2465	0.480974	0.0458	0	0.1723	0.342931	0.954	0.7533	NA	8.7985e-44	0.0004	NA	0.2998	0.461627	0.0536	0	0.1916	0.333608	0.946	0.7004	1	4.97001e-40	0	NA	0.1996	0.495386	0	NA	0.097	0.488588	1	0.8009	NA	2.02631e-60
anterior cingulum	Left caudal anterior cingulate cortex	ACc_L	YES; TBV	0.1505	0	0.4151	0.186302	0	NA	0.1411	0.5	0.8495	0.5864	1	6.11265e-26	0.1979	0.0081	0.4338	0.039107	0	NA	0.1057	0.5	0.8021	0.5663	0.9757	2.04423e-27	0.1072	0.0005	0.2899	0.128476	0	NA	0.1232	0.5	0.8928	0.7101	0.9996	4.252e-41
frontal cortex	Left caudal middle frontal gyrus	cMFG_L	YES; TBV	0.2459	0	0.4699	0.0844148	0.0047	NA	0.125	0.45217	0.7494	0.527	0.97	1.31793e-30	0.0239	0	0.3272	0.369588	0.0541	0	0.2051	0.386936	0.9219	0.6598	1	1.0151e-26	0.1608	0.0001	0.3769	0.173691	0.0227	0	0.1551	0.274921	0.8165	0.6186	0.9776	4.64562e-38
temporal cortex	Left entorhinal gyrus	Ent_L	YES; TBV	0	NA	0.1151	0.489698	0.0177	NA	0.1178	0.244403	0.9823	0.8703	NA	1.53899e-45	0.0044	NA	0.1386	0.423502	0.0066	NA	0.1063	0.37995	0.9889	0.859	NA	4.30121e-40	0.0054	NA	0.1491	0.356151	0.0598	0	0.174	0.112603	0.9347	0.812	0.9928	1.35548e-46
temporal cortex	Left fusiform gyrus	FG_L	YES; TBV	0.1629	0	0.4052	8.27105e-05	0	NA	0.178	0.5	0.8371	0.5938	1	1.41475e-155	0.2105	0	0.4835	0.164393	0	NA	0.218	0.5	0.7895	0.5171	1	2.59914e-66	0.0427	0	0.2829	0.351703	0	NA	0.1013	0.5	0.9573	0.7154	1	2.64034e-45
temporal cortex	Left inferior temporal gyrus	ITG_L	YES; TBV	0.1207	0	0.3801	0.134199	0.0987	0	0.2733	0.0864196	0.7806	0.58	0.9493	1.8493e-49	0.093	0	0.3867	0.115808	0.2533	0.0658	0.4173	0.0483748	0.6537	0.4532	0.8395	1.04429e-24	0.2162	0	0.4424	0.0775865	0.0306	0	0.182	0.177275	0.7532	0.543	0.9597	4.06053e-77
frontal cortex	Left lateral orbitofrontal gyrus	lOFG_L	YES; TBV	0.068	0.0039	0.1991	0.0726663	0.0633	0.0003	0.1878	0.0823786	0.8687	0.7195	0.9908	1.97676e-51	0.0096	NA	0.1644	0.419519	0.0036	NA	0.134	0.44893	0.9869	0.8316	NA	2.18766e-39	0.0341	0	0.1446	0.379811	0.0416	0	0.1388	0.142	0.9243	0.7929	0.9995	1.38757e-49
frontal cortex	Left medial orbitofrontal gyrus	mOFG_L	YES; TBV	0.0035	NA	0.0842	0.34597	0.0572	0	0.1672	0.310129	0.9393	0.8217	1	8.2881e-43	0.0051	NA	0.0827	0.468708	0.0002	NA	0.0379	0.484935	0.9947	0.9165	NA	1.11086e-53	0.0001	NA	0.1998	0.49546	0.0629	0	0.1712	0.298168	0.937	0.8288	1	3.64967e-56
temporal cortex	Left middle temporal gyrus	MTG_L	YES; TBV	0.4257	0.1394	0.6505	0.00482828	0.0374	0	0.1898	0.172624	0.5369	0.3338	0.7859	1.57259e-54	0.0253	0	0.4049	0.442061	0.1579	0	0.3145	0.148845	0.8168	0.5739	0.9733	6.88565e-41	0.5081	0.2041	0.7147	0.00361071	0.0238	0	0.1552	0.35741	0.4681	0.2749	0.7231	1.18499e-60
temporal cortex	Left parahippocampal gyrus	Par_L	YES; TBV	0.0258	0	0.2233	0.164868	0.0147	NA	0.1505	0.359872	0.9595	0.7755	0.9992	1.22041e-42	0.1656	0.0141	0.369	0.0885995	0	NA	0.1598	0.491033	0.8344	0.6294	0.9551	1.58386e-40	0.0558	0	0.2243	0.228313	0.0107	0	0.1441	0.396498	0.9336	0.7742	0.999	2.9319e-47
frontal cortex	Left pars opercularis	Opr_L	YES; TBV	0.0014	NA	0.2253	0.417858	0.0643	0	0.197	0.333987	0.9343	0.7729	1	1.50334e-56	0.025	NA	0.2046	0.344357	0.0065	NA	0.115	0.448581	0.9685	0.7866	NA	1.47705e-36	0.0224	0	0.242	0.459701	0.0279	0	0.1342	0.44297	0.9497	0.7548	1	8.01638e-46
frontal cortex	Left pars orbitalis	Orb_L	YES; TBV	0.0098	NA	0.1044	0.387777	0.0025	NA	0.0827	0.453404	0.9877	0.8951	NA	1.37512e-54	0.0514	0	0.2581	0.425498	0.0097	NA	0.1612	0.455386	0.9389	0.7421	1	7.32065e-55	0.076	0	0.2849	0.408513	0.0163	NA	0.174	0.478337	0.9077	0.7146	0.9999	6.9289e-51
frontal cortex	Left pars triangularis	Tri_L	YES; TBV	0.061	0	0.3263	0.404331	0.074	0	0.2343	0.303631	0.865	0.6718	0.9975	4.9132e-46	0.1043	0	0.4106	0.319054	0.0418	0	0.2055	0.421322	0.8539	0.5907	0.9901	8.46479e-29	0.0038	NA	0.1098	0.47453	0.0056	NA	0.0775	0.303703	0.9907	0.8797	NA	3.88656e-49
anterior cingulum	Left rostral anterior cingulate gyrus	ACr_L	YES; TBV	0.1537	0	0.367	0.229293	0.0068	NA	0.1923	0.353367	0.8396	0.6329	1	1.16163e-40	0.0046	NA	0.1401	0.378648	0.0159	NA	0.1294	0.398023	0.9795	0.8344	1	3.63765e-48	0.1258	0	0.3336	0.228258	0.037	0	0.1908	0.426283	0.8371	0.6526	0.9867	4.54431e-47
frontal cortex	Left rostral middle frontal gyrus	rMFG_L	YES; TBV	0.216	0.0413	0.3989	0.00906006	0	NA	0.1097	0.5	0.784	0.6012	0.9453	6.54398e-56	0.044	0.0002	0.1709	0.204281	0	NA	0.0692	0.5	0.956	0.8298	0.9998	6.15017e-32	0.2568	0.0144	0.4604	0.0506475	0	NA	0.1153	0.499999	0.7432	0.5391	0.933	1.83174e-30
frontal cortex	Left superior frontal gyrus	SFG_L	YES; TBV	0.03	0	0.3165	0.287407	0.1164	0	0.2706	0.129133	0.8536	0.6549	1	7.04563e-40	0.0076	NA	0.4321	0.384864	0.1167	0	0.2681	0.275632	0.8757	0.5648	1	4.4706e-24	0.0645	0	0.335	0.294025	0.0663	0	0.1717	0.155049	0.8691	0.634	0.9959	1.72397e-29
temporal cortex	Left superior temporal gyrus	STG_L	YES; TBV	0.4314	0.0784	0.6638	0.0105346	0.0743	0	0.3147	0.258373	0.4943	0.3283	0.7143	6.13088e-44	0.1024	0	0.4458	0.394946	0.0942	0	0.306	0.26123	0.8034	0.5469	0.9972	5.18421e-30	0.4318	0.1692	0.6126	0.00569426	0	NA	0.1385	0.497827	0.5682	0.3864	0.7712	3.65e-26
frontal cortex	Left frontal pole	FP_L	YES; TBV	0.0058	NA	0.0748	0.394346	0.0004	NA	0.0597	0.482567	0.9938	0.919	NA	5.47343e-60	0.2949	0	0.5141	0.115808	0.0004	NA	0.2456	0.488165	0.7047	0.4861	0.933	2.09426e-26	0.1413	0	0.2997	0.191224	0.0011	NA	0.1533	0.479536	0.8576	0.6996	0.9817	2.19837e-50
temporal cortex	Left temporal pole	TP_L	YES; TBV	0.3646	0.0622	0.5786	0.016355	0.049	NA	0.2584	0.207347	0.5864	0.4082	0.7824	2.8906e-30	0.0352	0	0.3498	0.434927	0.0903	0	0.2472	0.205049	0.8745	0.6462	1	2.20854e-31	0.4025	0.1539	0.5837	0.00682739	0.0001	NA	0.1253	0.478882	0.5973	0.4162	0.7934	2.86087e-26
temporal cortex	Left transverse temporal gyrus	TTG_L	YES; TBV	0.0055	NA	0.2077	0.330746	0.0004	NA	0.0906	0.445548	0.9942	0.7936	NA	7.55868e-56	0.0666	0	0.3229	0.177992	0.0479	0	0.1911	0.137654	0.8855	0.6561	1	1.6425e-30	0.0272	0	0.1485	0.14229	0.0327	0	0.1272	0.127463	0.9401	0.8081	1	3.30901e-47
insular cortex	Left insula	Ins_L	YES; TBV	0.001	NA	0.1029	0.443773	0.0029	NA	0.056	0.379816	0.9961	0.8874	NA	4.01257e-33	0.0721	0	0.4089	0.45452	0.0737	0	0.2309	0.173706	0.8542	0.5783	0.991	1.33261e-27	0.0568	0	0.3256	0.266203	0.0909	0	0.2287	0.315201	0.8523	0.6432	0.979	6.19397e-33
temporal cortex	Right banks of superior temporal gyrus	Bank_R	YES; TBV	0.2409	0	0.4301	0.110944	0.0031	NA	0.2433	0.464216	0.756	0.5687	0.9252	1.91372e-36	0.0449	NA	0.2534	0.281508	0.0118	0	0.0948	0.285558	0.9433	0.7436	1	5.49304e-24	0.3213	0	0.5906	0.121374	0.0213	0	0.2445	0.29487	0.6573	0.4072	0.9184	2.45237e-17
anterior cingulum	Right caudal anterior cingulate cortex	ACc_R	YES; TBV	0.1043	0	0.4015	0.282663	0.086	0	0.2657	0.16848	0.8098	0.5779	0.9806	4.55174e-32	0.1317	0	0.3591	0.0592023	0.0232	NA	0.1675	0.260881	0.8451	0.6251	0.9973	3.91809e-33	0.2973	0	0.5338	0.107681	0.0258	NA	0.2528	0.386507	0.6769	0.4603	0.9193	2.02951e-27
frontal cortex	Right caudal middle frontal gyrus	cMFG_R	YES; TBV	0.0104	NA	0.1211	0.321835	0	NA	0.0711	0.499995	0.9896	0.8789	NA	9.73914e-46	0.031	0	0.1826	0.309933	0	NA	0.0886	0.5	0.969	0.8158	1	1.41714e-42	0.0668	0.0032	0.1947	0.313709	0	NA	0.0667	0.499987	0.9332	0.8051	0.997	7.03089e-46
temporal cortex	Right entorhinal gyrus	Ent_R	YES; TBV	0.0016	NA	0.2158	0.459286	0.0497	0	0.1817	0.215466	0.9488	0.7716	1	2.30723e-42	0.0088	NA	0.2148	0.44268	0.0003	NA	0.1275	0.47015	0.9908	0.7844	NA	3.90137e-36	0.0019	NA	0.1205	0.491705	0.0562	0	0.1756	0.209695	0.9419	0.8076	1	8.67416e-46
temporal cortex	Right fusiform gyrus	FG_R	YES; TBV	0.0117	0	0.1873	0.255145	0.0399	0	0.1574	0.139697	0.9484	0.7829	0.9998	5.75521e-53	0.0461	0	0.3545	0.280364	0.1949	0	0.3818	0.072064	0.759	0.5886	0.9311	2.65836e-52	0.0015	NA	0.1879	0.417388	0.0102	0	0.103	0.230218	0.9883	0.8101	1	3.3859e-58
temporal cortex	Right inferior temporal gyrus	ITG_R	YES; TBV	0.2302	0	0.4614	0.0953634	0.0034	0	0.1622	0.42503	0.7664	0.5379	0.9782	1.83116e-29	0.0162	NA	0.1833	0.302968	0.0032	0	0.1108	0.446082	0.9805	0.8165	NA	3.96316e-43	0.1466	0.0003	0.3217	0.104543	0	NA	0.1142	0.496112	0.8533	0.6776	0.9886	6.38854e-50
frontal cortex	Right lateral orbitofrontal gyrus	lOFG_R	YES; TBV	0.05	0	0.3892	0.18407	0.2281	0	0.3803	0.0887314	0.7219	0.5558	0.8642	3.42516e-36	0.051	0	0.4792	0.340308	0.269	0	0.4588	0.139655	0.68	0.4556	0.8915	4.14265e-24	0.1678	0.0004	0.4361	0.244927	0.074	0	0.2529	0.368532	0.7583	0.5632	0.9221	6.80852e-41
frontal cortex	Right medial orbitofrontal gyrus	mOFG_R	YES; TBV	0.0004	NA	0.1451	0.445881	0.0041	NA	0.0944	0.436504	0.9955	0.8535	NA	7.14812e-40	0.0781	0	0.2884	0.242825	0.0188	NA	0.1565	0.430778	0.9031	0.7016	1	6.4345e-30	0.0597	0	0.2797	0.394159	0.0296	NA	0.1495	0.46303	0.9107	0.7429	1	6.45777e-45
temporal cortex	Right middle temporal gyrus	MTG_R	YES; TBV	0.0899	0	0.3202	0.318573	0.0836	0.0049	0.1993	0.0551971	0.8265	0.6158	0.971	1.51715e-33	0.0152	0	0.1766	0.266222	0.069	0.0043	0.1941	0.109419	0.9158	0.744	0.9854	3.66539e-27	0.198	0.0003	0.4685	0.104699	0.0067	0	0.1074	0.294375	0.7954	0.531	0.9976	8.56248e-23
temporal cortex	Right parahippocampal gyrus	Par_R	YES; TBV	0.0657	0	0.2861	0.232255	0.0074	0	0.1571	0.386542	0.927	0.7102	1	1.12127e-36	0.0806	0	0.4883	0.329583	0.1529	0	0.3622	0.259302	0.7665	0.5074	0.9471	4.40359e-27	0.1573	0	0.4762	0.313882	0.084	0	0.2998	0.247788	0.7587	0.5143	0.9604	7.38901e-31
frontal cortex	Right pars opercularis	Opr_R	YES; TBV	0.0066	0	0.2598	0.418468	0.0334	NA	0.174	0.34322	0.96	0.7371	1	1.22484e-30	0.0023	NA	0.2139	0.456946	0.0111	NA	0.1432	0.475836	0.9867	0.7805	NA	8.39769e-35	0.0185	NA	0.219	0.469807	0.008	NA	0.1226	0.386415	0.9735	0.7808	1	2.81566e-44
frontal cortex	Right pars orbitalis	Orb_R	YES; TBV	0.037	NA	0.305	0.438389	0.0626	0	0.2132	0.355535	0.9004	0.695	1	8.37213e-51	0.0081	NA	0.1623	0.411815	0.0145	NA	0.1187	0.376427	0.9773	0.8289	1	5.77894e-38	0.0386	NA	0.2438	0.296176	0.0197	NA	0.1362	0.441547	0.9417	0.7543	1	4.4093e-47
frontal cortex	Right pars triangularis	Tri_R	YES; TBV	0.1582	0	0.3803	0.168615	0	NA	0.1593	0.5	0.8418	0.6194	0.9883	5.08855e-33	0.0573	0	0.2556	0.23202	0	NA	0.1651	0.5	0.9427	0.7461	1	1.03386e-36	0.2479	0	0.4651	0.0989728	0	NA	0.2007	0.5	0.7521	0.5361	0.9691	2.4661e-33
anterior cingulum	Right rostral anterior cingulate gyrus	ACr_R	YES; TBV	0.0086	NA	0.2918	0.453075	0.0974	0	0.2407	0.190347	0.8939	0.7056	0.9993	1.59741e-33	0.0643	NA	0.3238	0.35929	0.0118	0	0.1487	0.493188	0.9239	0.6692	NA	8.06286e-28	0.089	0	0.3255	0.248947	0.0397	0	0.189	0.234527	0.8713	0.6675	0.9949	9.89806e-39
frontal cortex	Right rostral middle frontal gyrus	rMFG_R	YES; TBV	0.2034	0.0141	0.4105	0.0357333	0.0155	NA	0.1538	0.233603	0.7811	0.5818	0.9585	5.18217e-40	0.0031	NA	0.1895	0.36641	0.0033	NA	0.1156	0.397432	0.9936	0.809	NA	1.80575e-37	0.2385	0.0332	0.4414	0.0157531	0.0086	NA	0.1248	0.348094	0.7529	0.5529	0.9379	5.19523e-41
frontal cortex	Right superior frontal gyrus	SFG_R	YES; TBV	0.0037	NA	0.2896	0.376214	0.0551	0	0.1924	0.288772	0.9412	0.709	1	9.71334e-41	0.0001	NA	0.3278	0.481324	0.0581	0	0.2095	0.288772	0.9418	0.6707	1	8.43938e-24	0.0046	NA	0.1132	0.313451	0.0015	NA	0.0506	0.383448	0.9939	0.8865	NA	5.67147e-38
temporal cortex	Right superior temporal gyrus	STG_R	YES; TBV	0.1047	0.0021	0.308	0.261436	0.0064	0	0.1074	0.378594	0.8889	0.6862	0.992	4.58131e-42	0.0005	NA	0.206	0.495134	0.0243	NA	0.178	0.358019	0.9752	0.7939	NA	1.97183e-49	0.1443	0.0032	0.3859	0.111397	0.0029	0	0.0929	0.395258	0.8528	0.6124	0.9915	6.82574e-31
frontal cortex	Right frontal pole	FP_R	YES; TBV	0.0177	0	0.1634	0.304181	0.012	NA	0.1435	0.464727	0.9703	0.8265	1	4.9991e-51	0.0059	NA	0.181	0.447347	0.0072	NA	0.1181	0.472417	0.9869	0.8194	1	3.03959e-46	0.0033	0	0.1238	0.458038	0.0008	NA	0.0712	0.469647	0.996	0.8764	NA	7.33885e-61
temporal cortex	Right temporal pole	TP_R	YES; TBV	0.1579	0	0.3637	0.0978199	0	NA	0.1432	0.5	0.8421	0.6364	0.9843	1.26394e-36	0.363	0	0.5615	0.0712802	0	NA	0.2575	0.5	0.637	0.4382	0.863	1.34863e-24	0.0308	0	0.1701	0.458738	0	NA	0.0964	0.5	0.9692	0.8293	1	4.19875e-40
temporal cortex	Right transverse temporal gyrus	TTG_R	YES; TBV	0.002	NA	0.1573	0.398639	0.0022	NA	0.1195	0.44835	0.9958	0.839	NA	1.68463e-43	0.1353	0	0.3486	0.103657	0.0002	NA	0.1315	0.493369	0.8645	0.6512	0.9903	4.04463e-33	0.1574	0	0.342	0.145565	0.003	NA	0.1349	0.467255	0.8396	0.6553	0.9836	2.96957e-41
insular cortex	Right insula	Ins_R	YES; TBV	0.0322	NA	0.2406	0.471044	0.0091	NA	0.1131	0.380344	0.9587	0.7572	1	6.09339e-43	0.0036	NA	0.1396	0.417809	0.0021	NA	0.09	0.428692	0.9943	0.8608	NA	2.30075e-43	0.0489	0	0.2438	0.251702	0.0023	NA	0.0767	0.4425	0.9488	0.7566	1	1.20224e-46
white matter FA	Left anterior thalamic radiation	ATR_L	YES; GFA	0.0017	NA	0.0797	0.32035	0	NA	0.0459	0.467868	0.9983	0.9197	NA	0	0.0859	0	0.4995	1.65417e-282	0.2349	0	0.4388	0.0958122	0.6792	0.466	0.8592	1.49695e-78	0.055	0	0.3845	6.20481e-07	0.177	0	0.3349	0.133369	0.768	0.5803	0.9018	4.84465e-159
white matter FA	Right anterior thalamic radiation	ATR_R	YES; GFA	0.0112	0	0.1433	7.98214e-05	0.0294	0	0.1281	2.09108e-292	0.9594	0.8194	1	7.04898e-122	0.1044	0	0.5708	0.0681755	0.2853	0	0.5036	0	0.6103	0.4018	0.7927	0	0.0906	0	0.4526	0.121325	0.2128	0	0.3735	0.0671896	0.6966	0.4967	0.8521	1.358e-204
white matter FA	Left corticospinal tract	CST_L	YES; GFA	0.0268	0	0.2567	0.222339	0.0022	0	0.1599	0	0.9709	0.7414	1	3.45847e-176	0.1877	0	0.4953	0	0.0086	NA	0.206	0	0.8037	0.504	0.9956	6.2636e-232	0.2998	0.0024	0.5241	0	0.0065	NA	0.16	0.385217	0.6937	0.4724	0.9213	0
white matter FA	right corticospinal tract	CST_R	YES; GFA	0.1667	0	0.3824	0	0.0043	NA	0.1466	0	0.8291	0.615	0.9943	0	0.1059	0	0.381	6.66074e-318	0.1596	0	0.3382	0	0.7345	0.5232	0.9184	0	0.3761	0.0218	0.612	0.0268037	0.0737	0	0.2851	0	0.5502	0.3618	0.7799	2.93481e-169
white matter FA	Left cingulum (cingulate gyrus)	CGC_L	YES; GFA	0.1007	0	0.3249	3.11584e-43	0.0898	0	0.2637	0.0959812	0.8095	0.6226	0.9765	1.56547e-238	0.0125	NA	0.4254	4.87085e-169	0.2796	0.0001	0.4517	0	0.7079	0.509	0.8891	1.2874e-202	0.1407	0.0005	0.3957	0	0.1549	0.0163	0.3207	0	0.7044	0.5235	0.8702	1.32756e-250
white matter FA	Right cingulum (cingulate gyrus)	CGC_R	YES; GFA	0	NA	0.2272	2.48818e-43	0.0201	0	0.1716	0	0.9799	0.7738	1	3.72891e-105	0.0126	0	0.3871	2.17431e-104	0.127	0	0.3098	0.154624	0.8605	0.6051	0.9989	0	0.0106	0	0.3606	0.396017	0.1416	0	0.2825	0	0.8479	0.6384	0.9851	0
white matter FA	Left cingulum (hippocampus)	CGH_L	YES; GFA	0.0358	0	0.2989	4.25736e-42	0.0101	NA	0.1579	0.427662	0.9541	0.7002	1	1.061e-229	0.3188	0	0.5764	0.113369	0.0013	0	0.2681	0.461093	0.6799	0.4244	0.9753	3.57234e-140	0.1291	0	0.3856	1.44506e-92	0.0114	NA	0.1816	0.436038	0.8595	0.6142	1	8.3455e-89
white matter FA	Right cingulum (hippocampus)	CGH_R	YES; GFA	0.0225	0	0.2424	0	0.11	0.0062	0.2573	0.0379525	0.8675	0.6772	0.9697	1.0446e-82	0.025	0	0.2682	0	0.2824	0.0832	0.4486	0	0.6926	0.5242	0.8625	0	0.0795	0.003	0.3231	0	0.0349	0	0.1677	0.000593803	0.8856	0.6593	0.985	0
white matter FA	Forceps major	Fmajor	YES; GFA	0.1654	0	0.388	0	0.0036	NA	0.1929	0	0.831	0.6127	0.979	2.0984e-170	0.3016	0	0.6024	0.0341634	0.1174	0	0.4323	0	0.581	0.3832	0.819	1.69409e-105	0.0401	0	0.2765	0	0.0716	0	0.2103	0.138714	0.8883	0.707	0.9958	0
white matter FA	Forceps minor	Fminor	YES; GFA	0.0857	0	0.3388	0	0.0747	0	0.2231	0.080929	0.8396	0.6166	0.9945	2.31549e-81	0.0147	NA	0.3808	0	0.429	0.1187	0.5774	0	0.5563	0.3871	0.7229	1.86244e-126	0.1304	0	0.4791	0	0.1926	0.0148	0.3731	0	0.677	0.4332	0.8785	3.98962e-248
white matter FA	Left inferior fronto-occipital fasciculus	IFOF_L	YES; GFA	0.0067	NA	0.1407	0	0.0246	0	0.122	0	0.9688	0.8471	1	2.99002e-244	0.0495	NA	0.4174	0.403537	0.1256	0	0.3295	0	0.8249	0.5828	1	9.47396e-227	0.0305	0	0.2927	0.434849	0.0478	0	0.1768	0.324577	0.9217	0.7071	1	2.17503e-198
white matter FA	Right inferior fronto-occipital fasciculus	IFOF_R	YES; GFA	0.0064	NA	0.1435	0	0.0109	NA	0.1024	0	0.9827	0.8526	NA	1.15366e-93	0.0859	0	0.4196	0.371856	0.0925	0	0.3265	0.314159	0.8217	0.5814	1	0	0.043	0	0.2861	4.48309e-05	0.0366	0	0.1733	0.37413	0.9204	0.7142	1	0
white matter FA	Left inferior longitudinal fasciculus	ILF_L	YES; GFA	0.0006	NA	0.2198	0	0.0424	0	0.1478	0	0.957	0.7753	0.9999	0	0.0238	0	0.4551	0	0.221	0	0.3922	0	0.7552	0.5135	0.9266	0	0.027	0	0.2294	1.41074e-73	0.0681	0	0.1709	0	0.9049	0.7409	0.9888	3.50972e-159
white matter FA	Right inferior longitudinal fasciculus	ILF_R	YES; GFA	0.0007	NA	0.1933	2.80986e-94	0.0174	0	0.1463	0	0.9819	0.806	1	8.07096e-82	0.112	0.0021	0.4872	3.08195e-80	0.1841	0	0.3772	5.38713e-134	0.7039	0.4791	0.9093	0	0.0803	0.0046	0.2974	0	0.0728	0	0.1842	0	0.8469	0.6734	0.967	0
white matter FA	Left superior longitudinal fasciculus	SLF_L	YES; GFA	0.0048	0	0.2519	0	0.1028	0	0.263	0	0.8924	0.7124	0.9971	0	0.1185	0.0019	0.5654	0	0.3674	0.0175	0.5568	2.68728e-300	0.5141	0.3375	0.6856	2.68906e-302	0.0662	0	0.3538	0	0.2302	0.0421	0.3727	0.0144219	0.7035	0.5297	0.8429	3.90663e-172
white matter FA	Right superior longitudinal fasciculus	SLF_R	YES; GFA	0.0046	0	0.2868	0.318309	0.1993	0.0189	0.3485	0	0.7961	0.6058	0.9374	0	0.0348	0	0.3622	0	0.3576	0.0785	0.5237	1.06003e-220	0.6076	0.4488	0.7764	0	0.0605	0	0.3357	1.00946e-174	0.1869	0.0194	0.3227	0.031202	0.7526	0.5739	0.8947	4.97762e-151
white matter FA	Left uncinate fasciculus	UNC_L	YES; GFA	0.0028	NA	0.0919	2.25299e-235	0	NA	0.0535	0	0.9972	0.9086	NA	0	0.4341	0.0681	0.6546	0.0143694	0	NA	0.1802	0	0.5659	0.3458	0.8375	0	0.3602	0.0723	0.6002	0	0	NA	0.1274	0	0.6398	0.3982	0.8767	1.37e-225
white matter FA	Right uncinate fasciculus	UNC_R	YES; GFA	0.052	0.0008	0.197	3.23896e-267	0.0051	NA	0.0658	6.62976e-255	0.9429	0.8022	0.9964	0	0.017	NA	0.3466	0.164461	0.1611	0	0.3182	0.0784874	0.8219	0.6064	0.9605	1.02415e-85	0.1007	0.0095	0.3092	0	0.0908	0	0.2148	0.0721381	0.8085	0.6547	0.9336	9.09146e-185
white matter FA	Left superior longitudinal fasciculus (temporal part)	SLFtemp_L	YES; GFA	0.0143	0	0.253	7.50603e-130	0.0767	0.0023	0.1849	0	0.909	0.7091	0.9836	0	0.2855	0	0.5324	6.86253e-89	0.0061	NA	0.1962	0.35844	0.7084	0.4664	0.9485	2.91737e-135	0.1636	0	0.3834	0	0.0447	0	0.211	0	0.7917	0.595	0.9644	9.90884e-76
white matter FA	Right superior longitudinal fasciculus (temporal part)	SLFtemp_R	YES; GFA	0.0384	0	0.3769	0.000338668	0.1782	0	0.3353	0	0.7834	0.5883	0.9431	0	0.003	0	0.3723	0.0394415	0.1268	0	0.3085	0.213245	0.8702	0.6215	1	0	0.0202	0	0.4669	0.316592	0.2795	0	0.4144	6.5496e-308	0.7004	0.4884	0.8393	5.14521e-295
white matter MD	Left anterior thalamic radiation	ATR_L	YES; GMD	0.1374	0	0.4642	8.00191e-268	0.4246	0.1604	0.6158	0	0.438	0.3117	0.5916	0	0.0442	0	0.2562	0.0407186	0.3717	0.189	0.5218	0.00214663	0.5841	0.4369	0.741	1.64404e-254	0.1626	0	0.5448	0	0.3034	0	0.5188	0.046602	0.5341	0.3765	0.7144	9.9008e-274
white matter MD	Right anterior thalamic radiation	ATR_R	YES; GMD	0.0789	0	0.3205	0	0.658	0.4485	0.7733	1.4327e-05	0.2631	0.1697	0.3742	0	0.0008	0	0.1712	2.5386e-119	0.5279	0.3509	0.6514	0	0.4713	0.3493	0.6149	0	0.0874	0	0.3942	0	0.4656	0.2183	0.6138	0.00410903	0.447	0.3086	0.5854	0
white matter MD	Left corticospinal tract	CST_L	YES; GMD	0.023	0	0.194	0	0	NA	0.117	0.495176	0.977	0.8059	1	0	0.5745	0.1701	0.7254	2.62582e-45	0	NA	0.2734	0	0.4255	0.2747	0.6378	3.43986e-169	0.4183	0.112	0.5822	0	0	NA	0.2013	0	0.5817	0.4175	0.7686	1.12682e-259
white matter MD	right corticospinal tract	CST_R	YES; GMD	0.0001	NA	0.2174	0	0	NA	0.1265	0.170341	0.9999	0.7837	NA	2.33727e-148	0.616	0.282	0.7491	0	0	NA	0.2399	0	0.384	0.251	0.5728	1.27475e-77	0.533	0.2591	0.693	0	0	NA	0.1668	0	0.467	0.3055	0.6616	3.17527e-146
white matter MD	Left cingulum (cingulate gyrus)	CGC_L	YES; GMD	0.0406	0	0.3665	0.181363	0.1348	0	0.2974	0.162736	0.8246	0.6193	0.9697	6.51569e-103	0.3634	0.0342	0.5942	0.0358948	0.079	0	0.327	0.147251	0.5576	0.3806	0.7806	8.45823e-99	0.4202	0.0597	0.6151	0.0399846	0.0114	0	0.2364	0.358853	0.5684	0.3839	0.7859	3.02684e-110
white matter MD	Right cingulum (cingulate gyrus)	CGC_R	YES; GMD	0.3398	0	0.5806	0.1422	0.0431	0	0.3707	1.91211e-88	0.6171	0.4194	0.8659	0	0.1226	0	0.4181	0	0.1147	0	0.3312	0.124628	0.7626	0.5559	0.9492	1.30613e-173	0.0763	0	0.337	4.98323e-211	0.1102	0	0.2522	1.4359e-252	0.8135	0.6253	0.9526	1.62364e-140
white matter MD	Left cingulum (hippocampus)	CGH_L	YES; GMD	0.4336	0	0.6333	0	0.0015	0	0.2984	0.00116976	0.5649	0.3665	0.8049	1.16314e-79	0.088	0	0.4341	0.0872852	0.1339	0	0.3324	0	0.7781	0.5452	0.9612	7.71571e-125	0.1367	0	0.3862	0.0860351	0.0885	0	0.2618	0.133431	0.7748	0.593	0.9342	2.74725e-132
white matter MD	Right cingulum (hippocampus)	CGH_R	YES; GMD	0.1444	0	0.4608	0.118903	0.1013	0	0.2973	4.59863e-07	0.7543	0.5203	0.9401	1.6086e-105	0.0292	0	0.4971	0.199852	0.2839	0.0137	0.434	0.0465882	0.6869	0.4655	0.8585	2.83863e-65	0.2102	0	0.4638	2.04332e-107	0.0478	0	0.226	0.143096	0.742	0.5203	0.9469	0
white matter MD	Forceps major	Fmajor	YES; GMD	0.2007	0.0405	0.4006	0.00434606	0.1513	0.033	0.3187	0	0.648	0.4823	0.8138	2.29003e-105	0.1892	0	0.497	0	0.1526	0	0.3848	0.106457	0.6582	0.4624	0.8681	2.72737e-122	0.4026	0.038	0.6331	0	0.0515	0	0.2788	0	0.5459	0.3546	0.7857	1.60295e-66
white matter MD	Forceps minor	Fminor	YES; GMD	0.0406	0.0004	0.1958	0.00844658	0.7411	0.6034	0.817	2.9385e-08	0.2183	0.153	0.2967	0	0.003	0	0.2827	0	0.3801	0.1559	0.5232	0	0.6169	0.4596	0.7717	1.06875e-231	0.0226	0	0.4124	8.58546e-118	0.3344	0.0823	0.4658	1.10882e-05	0.643	0.4488	0.7776	3.05765e-255
white matter MD	Left inferior fronto-occipital fasciculus	IFOF_L	YES; GMD	0.217	0.0136	0.4622	0.00608859	0.5936	0.3647	0.7603	0	0.1894	0.1211	0.293	0	0.0051	0	0.3168	0.349421	0.4023	0.1582	0.5416	0.0012061	0.5926	0.4328	0.7437	0	0.2386	0.0193	0.5717	9.04919e-238	0.1791	0	0.3921	2.00324e-08	0.5823	0.4146	0.7485	1.12258e-303
white matter MD	Right inferior fronto-occipital fasciculus	IFOF_R	YES; GMD	0.3046	0.095	0.5857	0.00026568	0.3716	0.1151	0.5714	0	0.3239	0.2268	0.4459	0	0.1612	0	0.4192	0.0850138	0.2185	0.0379	0.4355	5.26027e-78	0.6203	0.4468	0.8066	0	0.5222	0.0566	0.6746	0	0.0095	NA	0.3352	0.307848	0.4682	0.3206	0.6907	1.69539e-141
white matter MD	Left inferior longitudinal fasciculus	ILF_L	YES; GMD	0.1953	0.0082	0.5443	0	0.3835	0.0991	0.5861	0.0065836	0.4212	0.2817	0.5848	2.97897e-150	0.1767	0	0.5478	0.0467668	0.371	0.0804	0.5951	0.000563675	0.4523	0.2818	0.662	6.93777e-88	0.2098	0.0029	0.4898	0.0292647	0.0685	0	0.2812	0.410084	0.7217	0.5048	0.9215	0
white matter MD	Right inferior longitudinal fasciculus	ILF_R	YES; GMD	0.327	0.0788	0.5575	0	0.0641	0	0.2827	0.244075	0.6088	0.4356	0.7946	0	0.2295	0	0.5987	9.81692e-41	0.154	0	0.4125	0	0.6165	0.3995	0.85	1.82772e-55	0.3509	0.0041	0.5805	0.0206698	0.0357	0	0.2832	0	0.6134	0.4175	0.8558	1.03847e-163
white matter MD	Left superior longitudinal fasciculus	SLF_L	YES; GMD	0.0813	0	0.4248	0.0531253	0.146	0	0.3025	0	0.7727	0.5424	0.9292	1.31942e-181	0.6662	0.2029	0.8018	0.00940199	0.0151	0	0.3455	0	0.3187	0.1983	0.5269	0	0.4241	0.0812	0.6372	0.00582274	0.0551	0	0.3001	0.186879	0.5209	0.3574	0.714	0
white matter MD	Right superior longitudinal fasciculus	SLF_R	YES; GMD	0.0712	0	0.2623	6.36155e-51	0.092	0.0028	0.2359	4.89665e-93	0.8368	0.6532	0.9908	6.32598e-76	0.2664	0.0107	0.572	0	0.2268	0.0026	0.4533	0.0392448	0.5068	0.3477	0.6978	0	0.4427	0.0781	0.6579	0	0.0578	0	0.2673	0.113739	0.4995	0.3236	0.7307	0
white matter MD	Left uncinate fasciculus	UNC_L	YES; GMD	0.0713	0	0.4687	0.122682	0.4527	0.1371	0.5961	0.0107922	0.476	0.3185	0.6148	0	0.3801	0	0.6822	0	0.1519	0	0.4561	0.22749	0.468	0.2926	0.7149	0	0.4576	0.0001	0.7083	0	0.1233	0	0.4436	0	0.4191	0.2765	0.6421	1.87724e-74
white matter MD	Right uncinate fasciculus	UNC_R	YES; GMD	0.2796	0	0.6345	0.0647066	0.2746	0.0049	0.5088	0	0.4459	0.2857	0.6472	0	0.0449	0	0.2249	0	0.0942	0	0.2748	0.0995919	0.8609	0.6743	0.9855	2.89564e-138	0.3536	0.0099	0.539	0	0.0233	0	0.2859	0.314709	0.6231	0.4555	0.8194	2.40464e-210
white matter MD	Left superior longitudinal fasciculus (temporal part)	SLFtemp_L	YES; GMD	0.215	0	0.627	0.180405	0.311	0.0131	0.5539	0	0.474	0.285	0.6892	0	0.148	0	0.5545	0	0.3262	0.0128	0.5563	0	0.5258	0.3448	0.7277	6.57054e-207	0.1463	0	0.3506	0	0.0281	0	0.2417	0	0.8257	0.6444	0.984	0
white matter MD	Right superior longitudinal fasciculus (temporal part)	SLFtemp_R	YES; GMD	0.0155	0	0.3685	0	0.214	0.0012	0.3658	0.0334514	0.7705	0.5676	0.9274	0	0.0904	0	0.4243	1.03141e-128	0.2644	0.0613	0.419	0	0.6453	0.4314	0.8273	0	0.0364	0	0.451	1.24776e-253	0.2044	0	0.3436	0	0.7592	0.5376	0.8979	4.5042e-139
